# Supplementary material for: Assembly of isoxazol-5-one with 2-unsubstituted imidazole N-oxides and aldehydes
Source: Royal Society of Chemistry journal article supplement (doi:10.1039/d2ob02157a), 2022-12-19
Supplement: d2ob02157a1.pdf [file d2ob02157a1.pdf]

# Organic & Biomolecular Chemistry

## Supporting Information

### Assembly of isoxazol-5-one with 2-unsustituted imidazole *N*-oxides and aldehydes

Ekaterina S. Uvarova<sup>[a]</sup>, Anton V. Kutasevich<sup>[a]</sup>, Egor S. Lipatov<sup>[b],[c]</sup>, and Vitaly S. Mityanov<sup>[a],\*</sup>

<sup>[a]</sup>Department of Fine Organic Synthesis and Chemistry of Dyes, Mendeleev University of Chemical Technology, Miusskaya Sq., 9, Moscow 125047, Russian Federation.

<sup>[b]</sup>A.N. Nesmeyanov Institute of Organoelement compounds Russian Academy of Sciences, Vavilov str. 28/1, 119334 Moscow, Russian Federation.

<sup>[c]</sup>Higher Chemical College of Russian Academy of Sciences, D.I. Mendeleev University of Chemical Technology of Russia, Miusskaya pl. 9, 125047, Moscow, Russian Federation.

e-mail: [mityanovvs@yandex.ru](mailto:mityanovvs@yandex.ru), [mitianov.v.s@muctr.ru](mailto:mitianov.v.s@muctr.ru)

## Table of Contents

|                                                                                          |         |
|------------------------------------------------------------------------------------------|---------|
| Copies of $^1\text{H}$ and $^{13}\text{C}$ NMR spectra                                   | S3-S54  |
| X-Ray Crystallographic Data of products <b>3c</b> , <b>3h</b> , <b>3j</b> , and <b>5</b> | S55-S57 |
| References                                                                               | S58     |

<sup>1</sup>H NMR (400 MHz, DMSO-d<sub>6</sub>) of **3a**

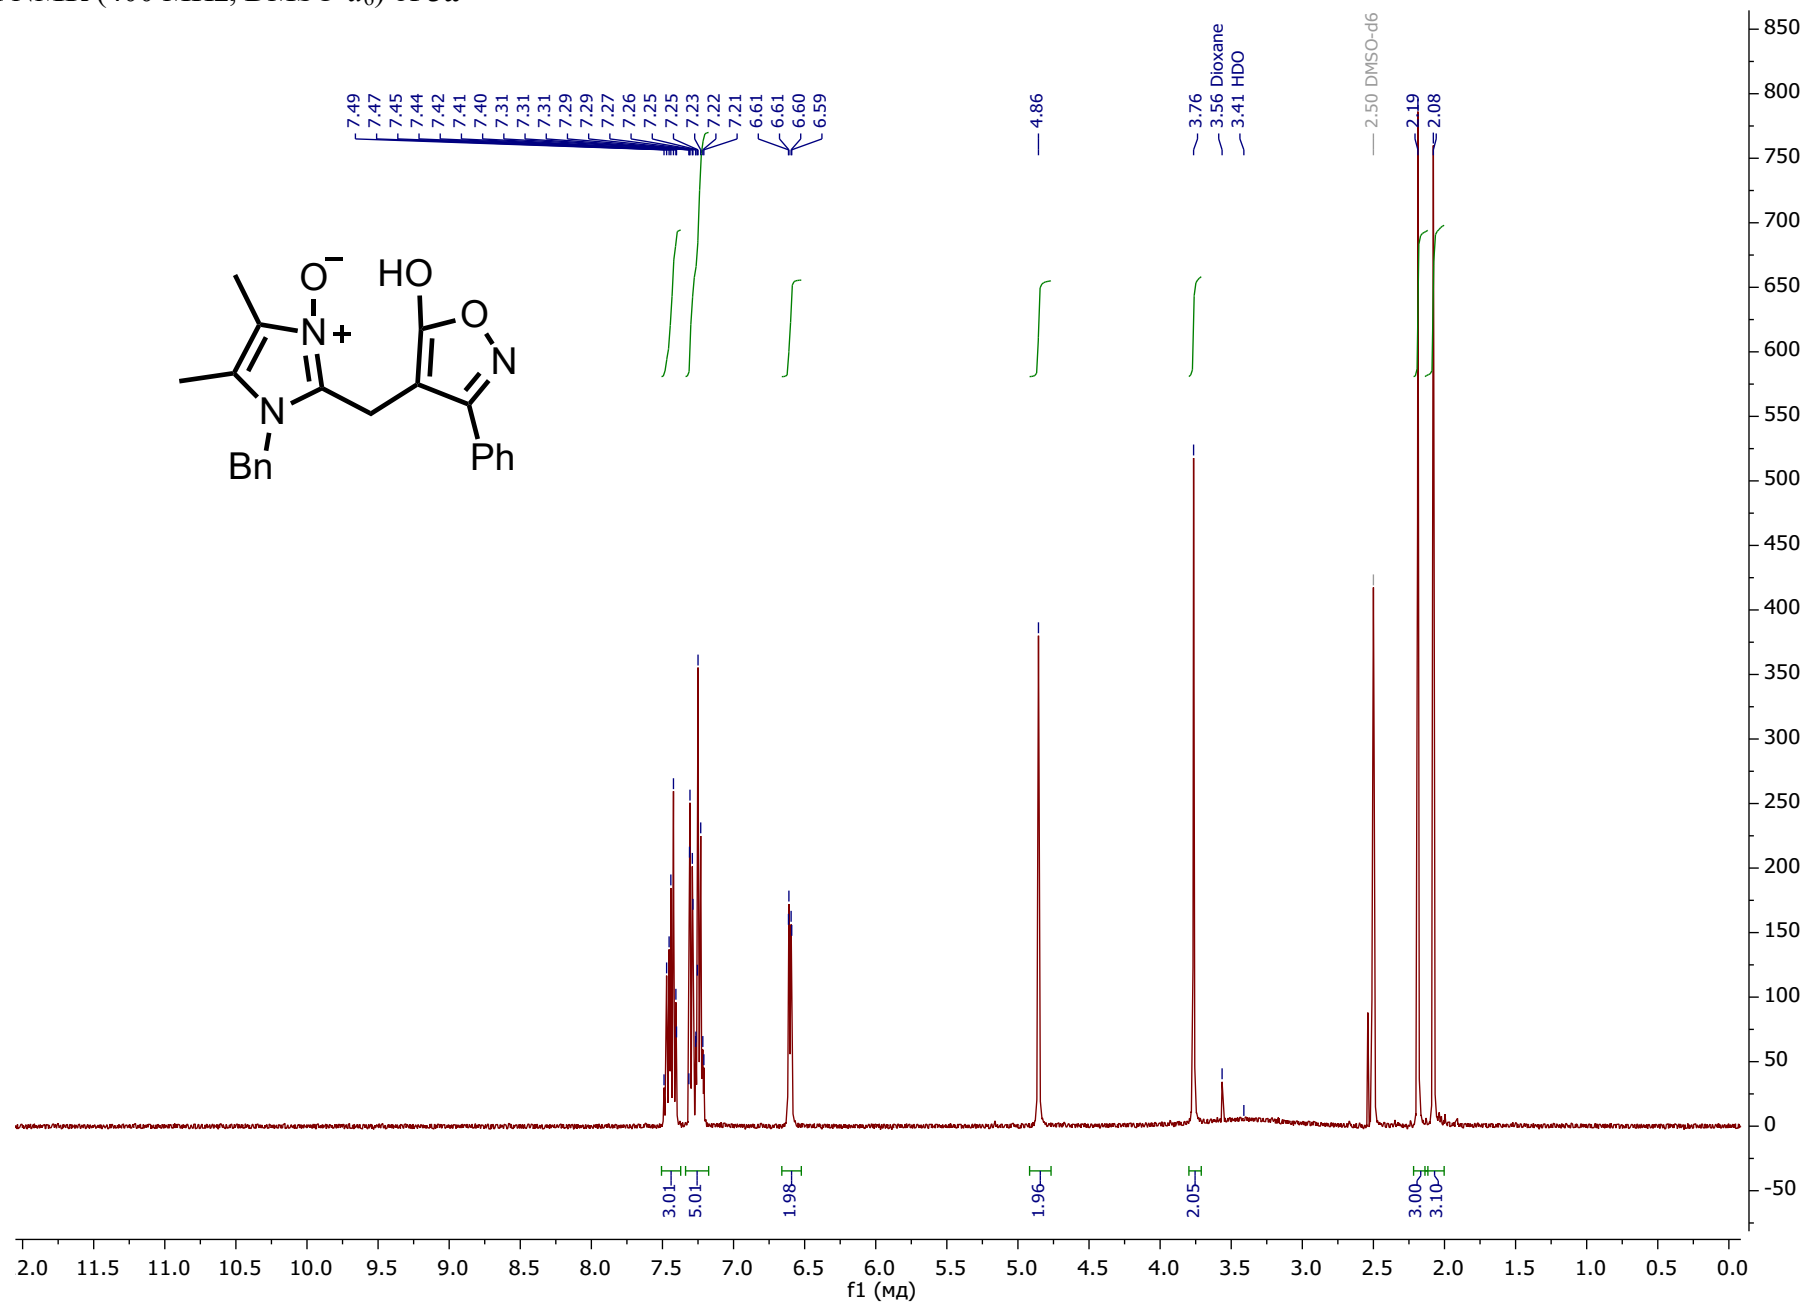

$^{13}\text{C}\{^1\text{H}\}$  NMR (151 MHz,  $\text{DMSO-}d_6$ ) of **3a**

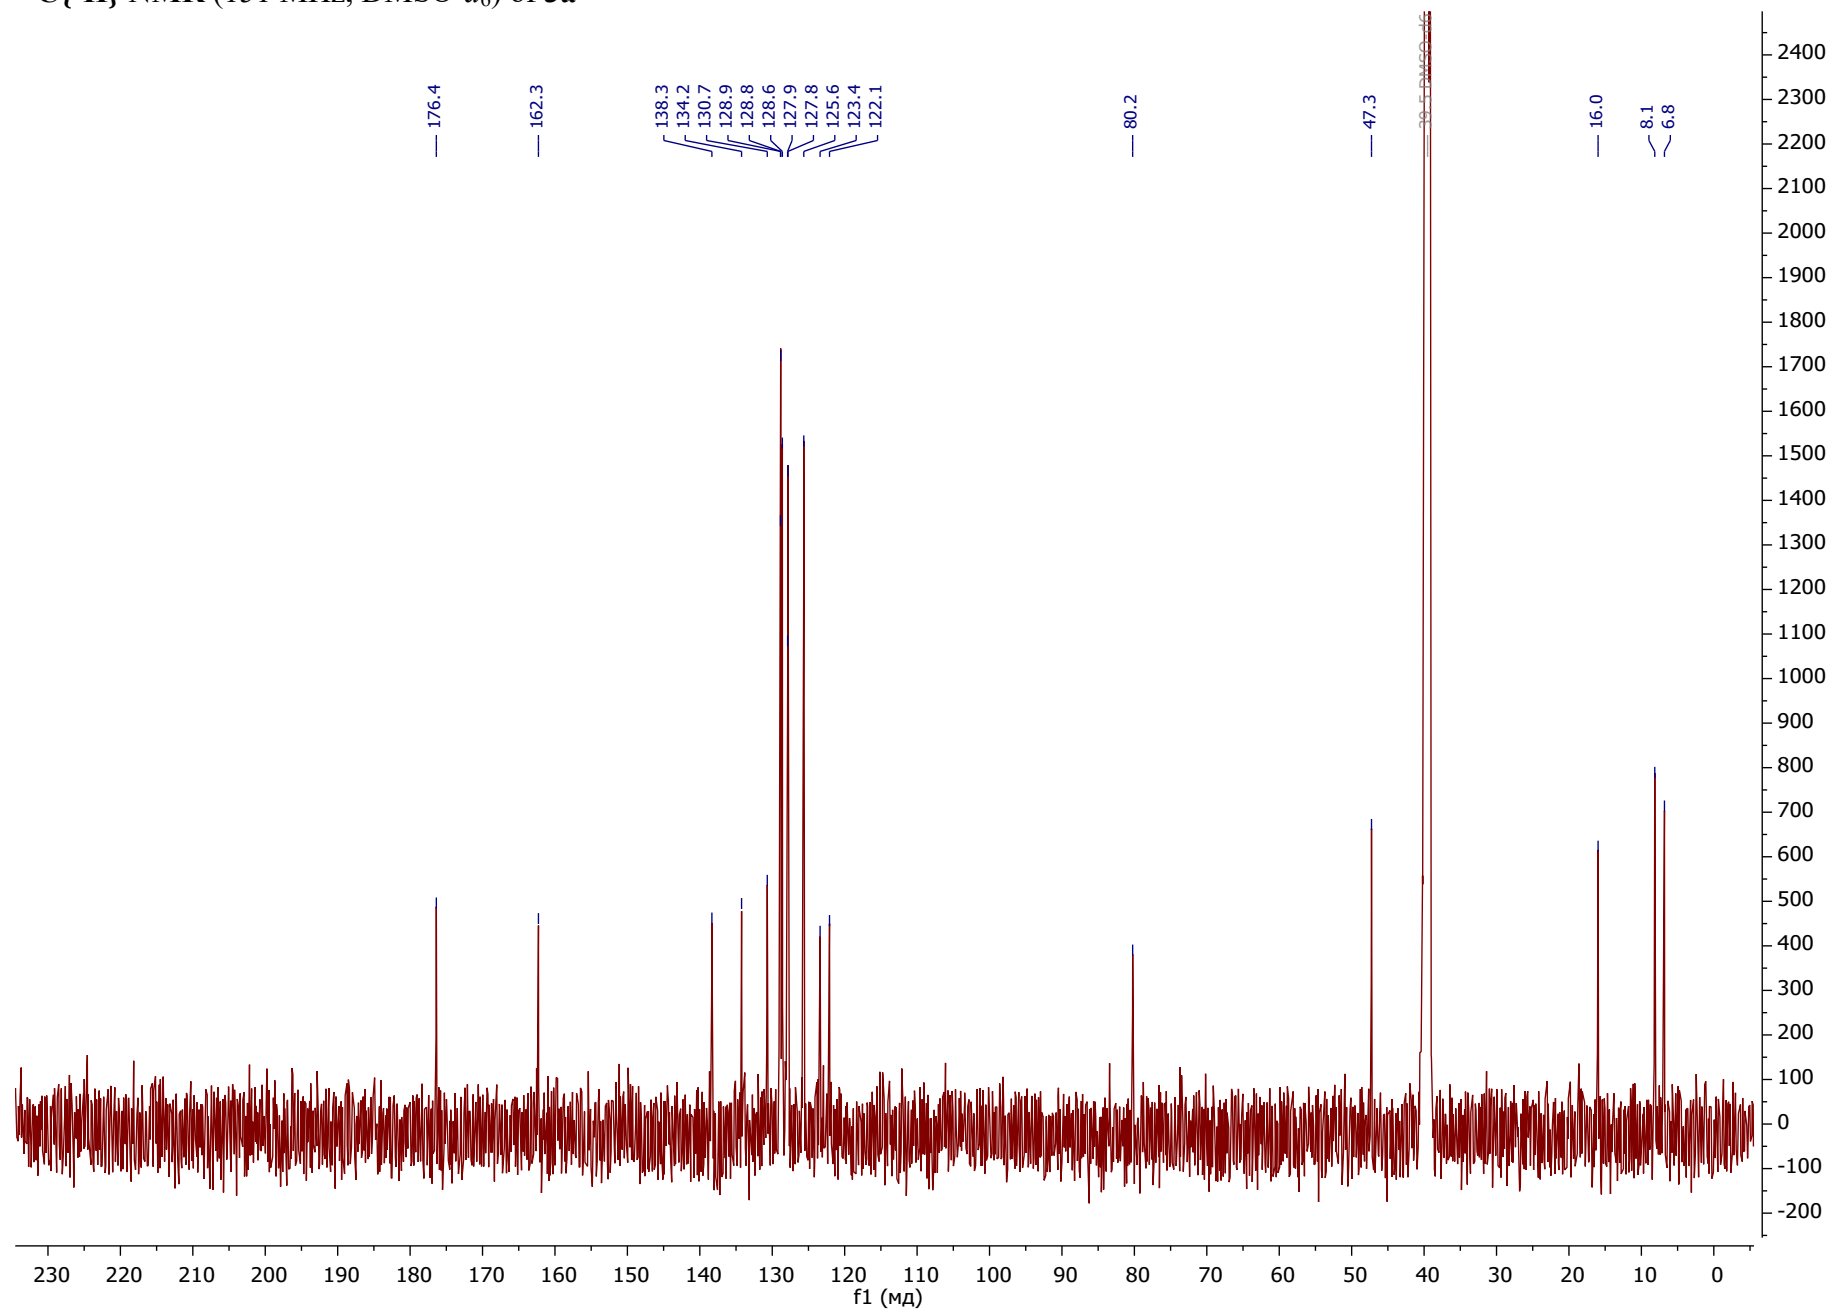

<sup>1</sup>H NMR (400 MHz, DMSO-d<sub>6</sub>) of **3b**

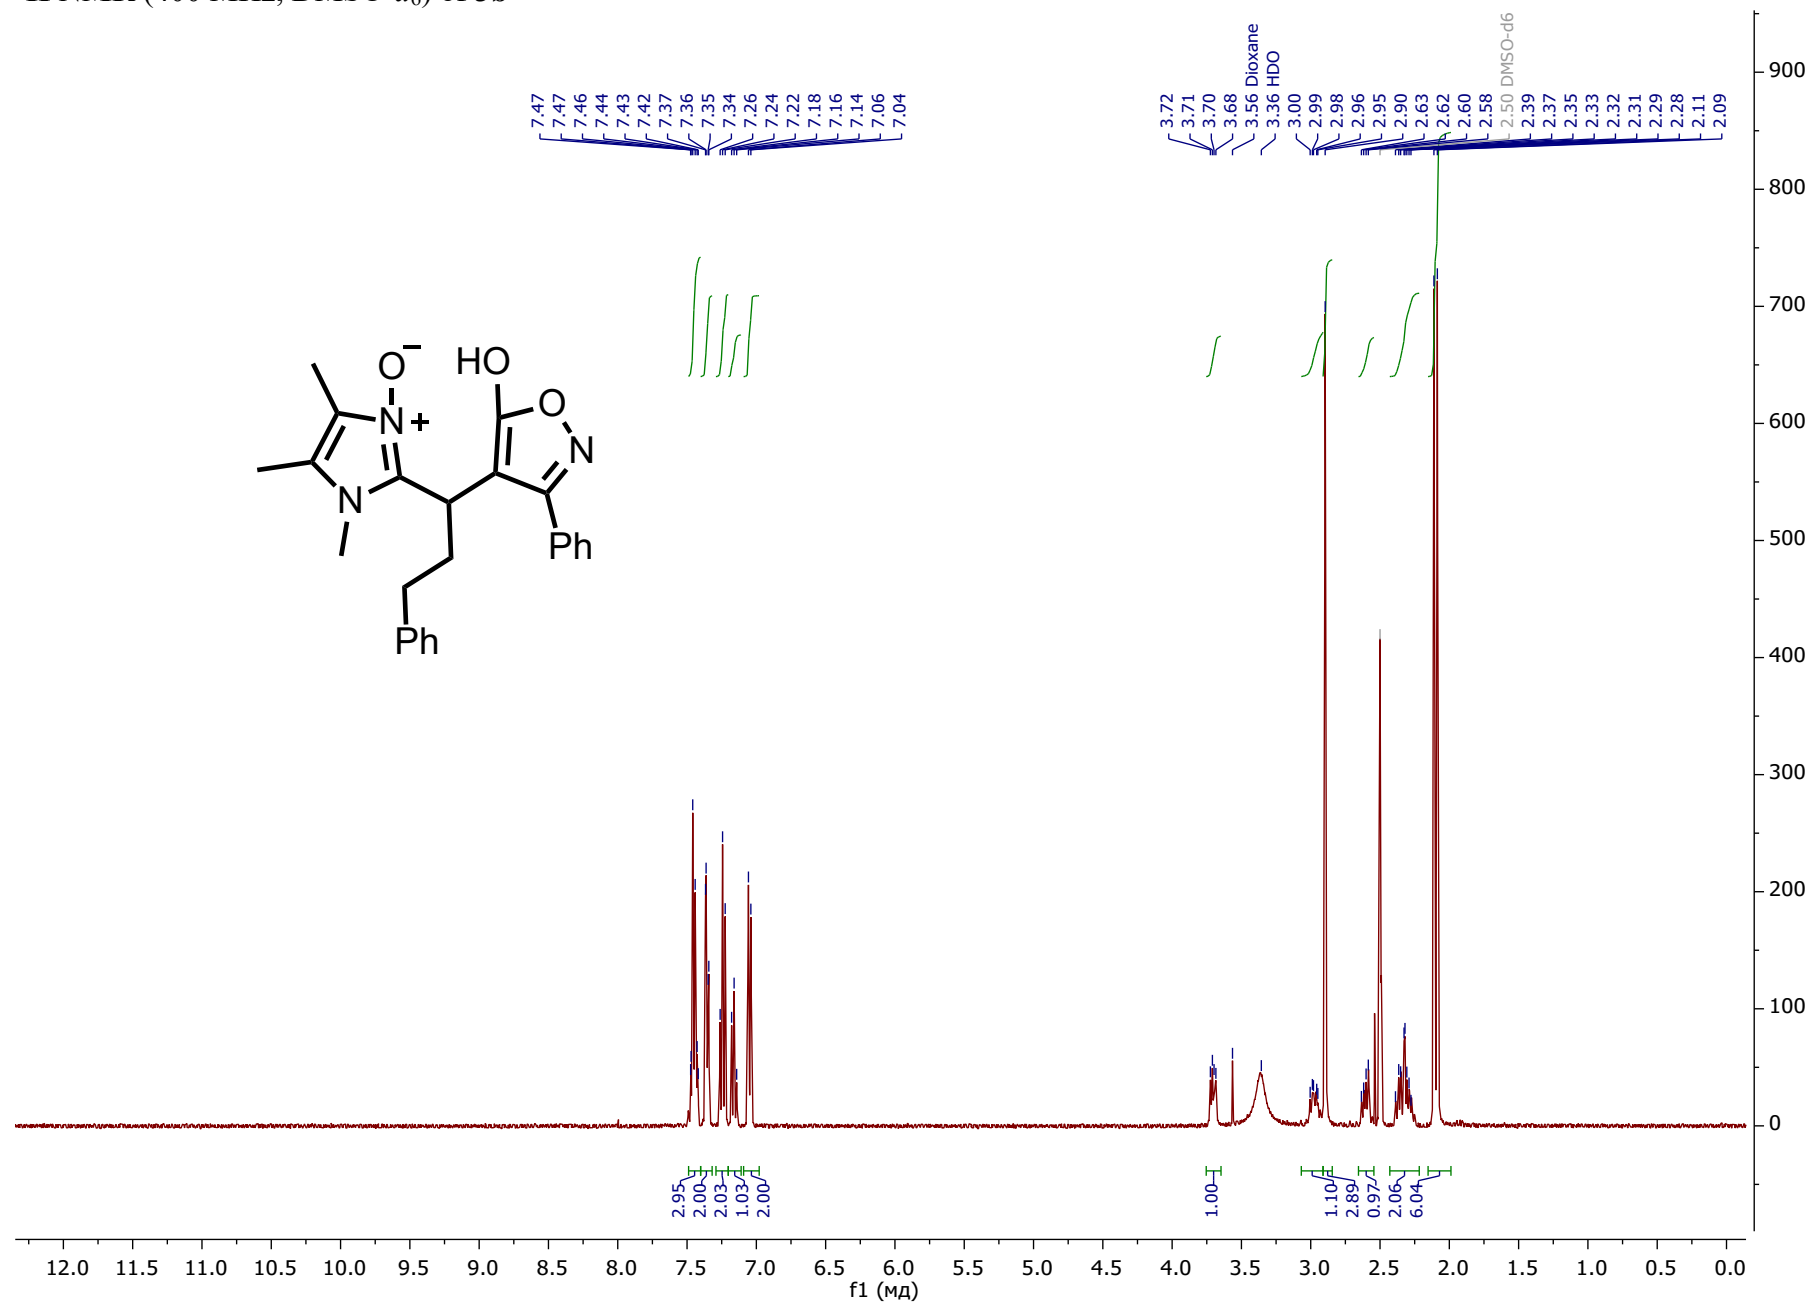

$^{13}\text{C}\{^1\text{H}\}$  NMR (101 MHz, DMSO- $d_6$ ) of **3b**

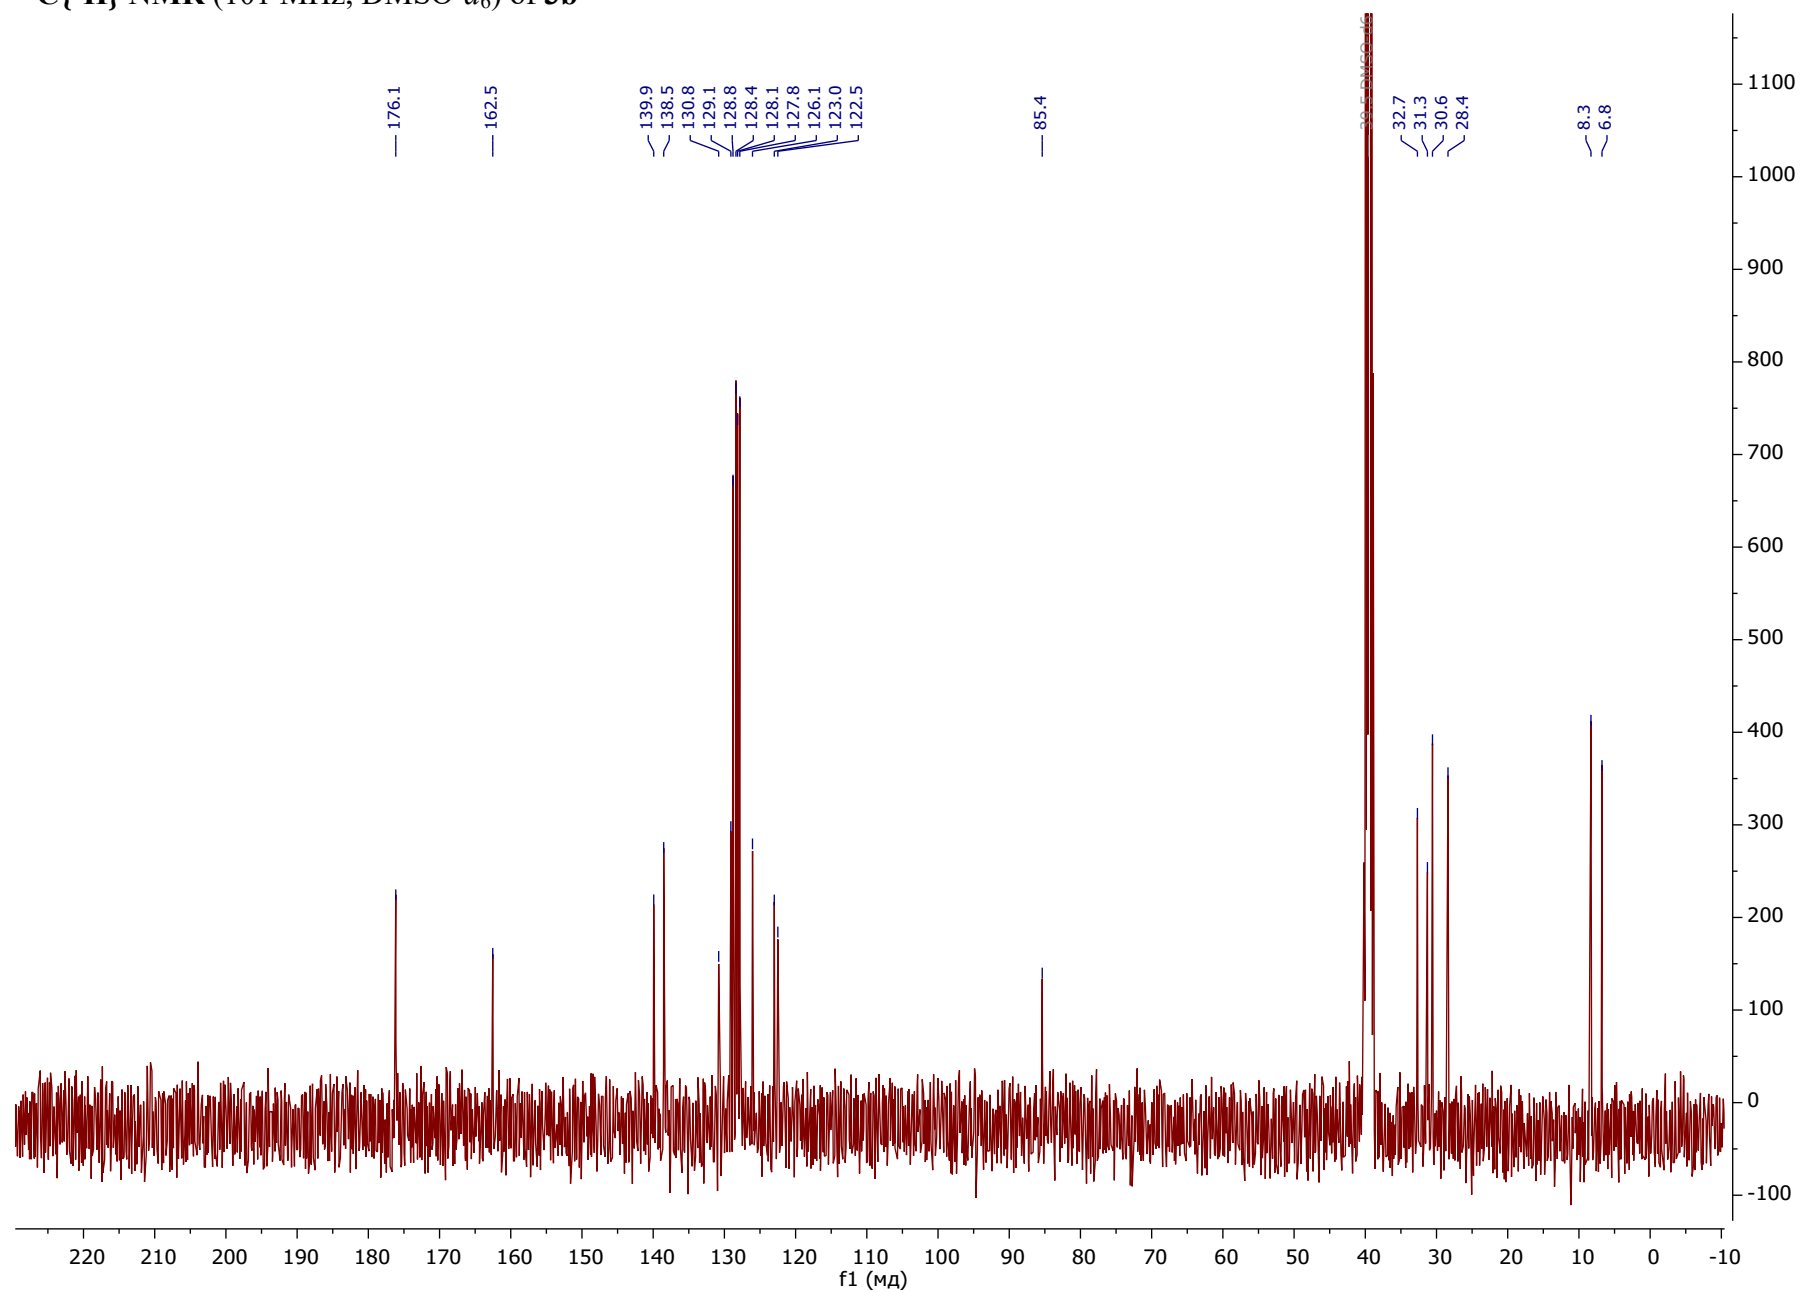

$^1\text{H}$  NMR (600 MHz,  $\text{DMSO-}d_6$ ) of **3c**

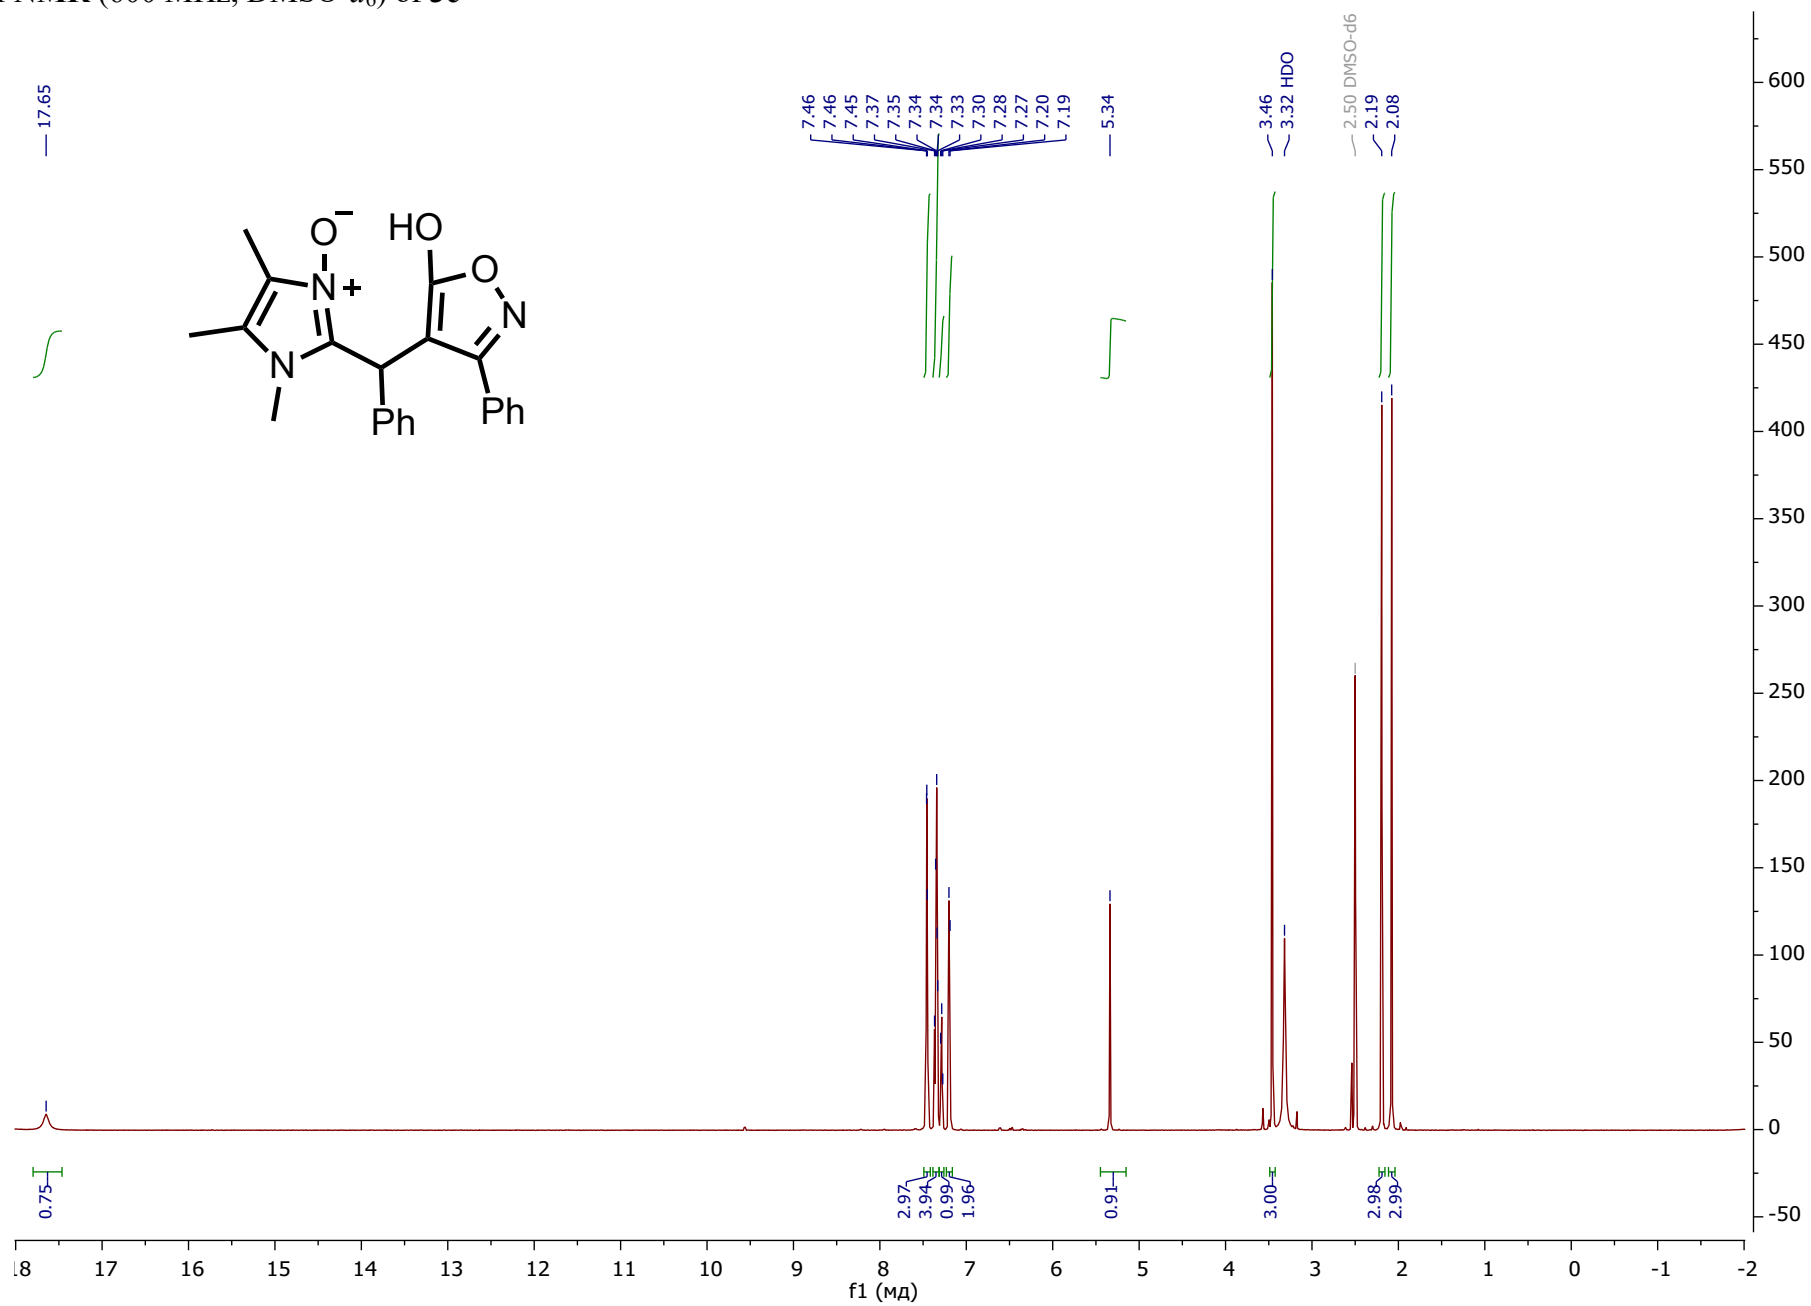

$^{13}\text{C}\{^1\text{H}\}$  NMR (151 MHz, DMSO- $d_6$ ) of **3c**

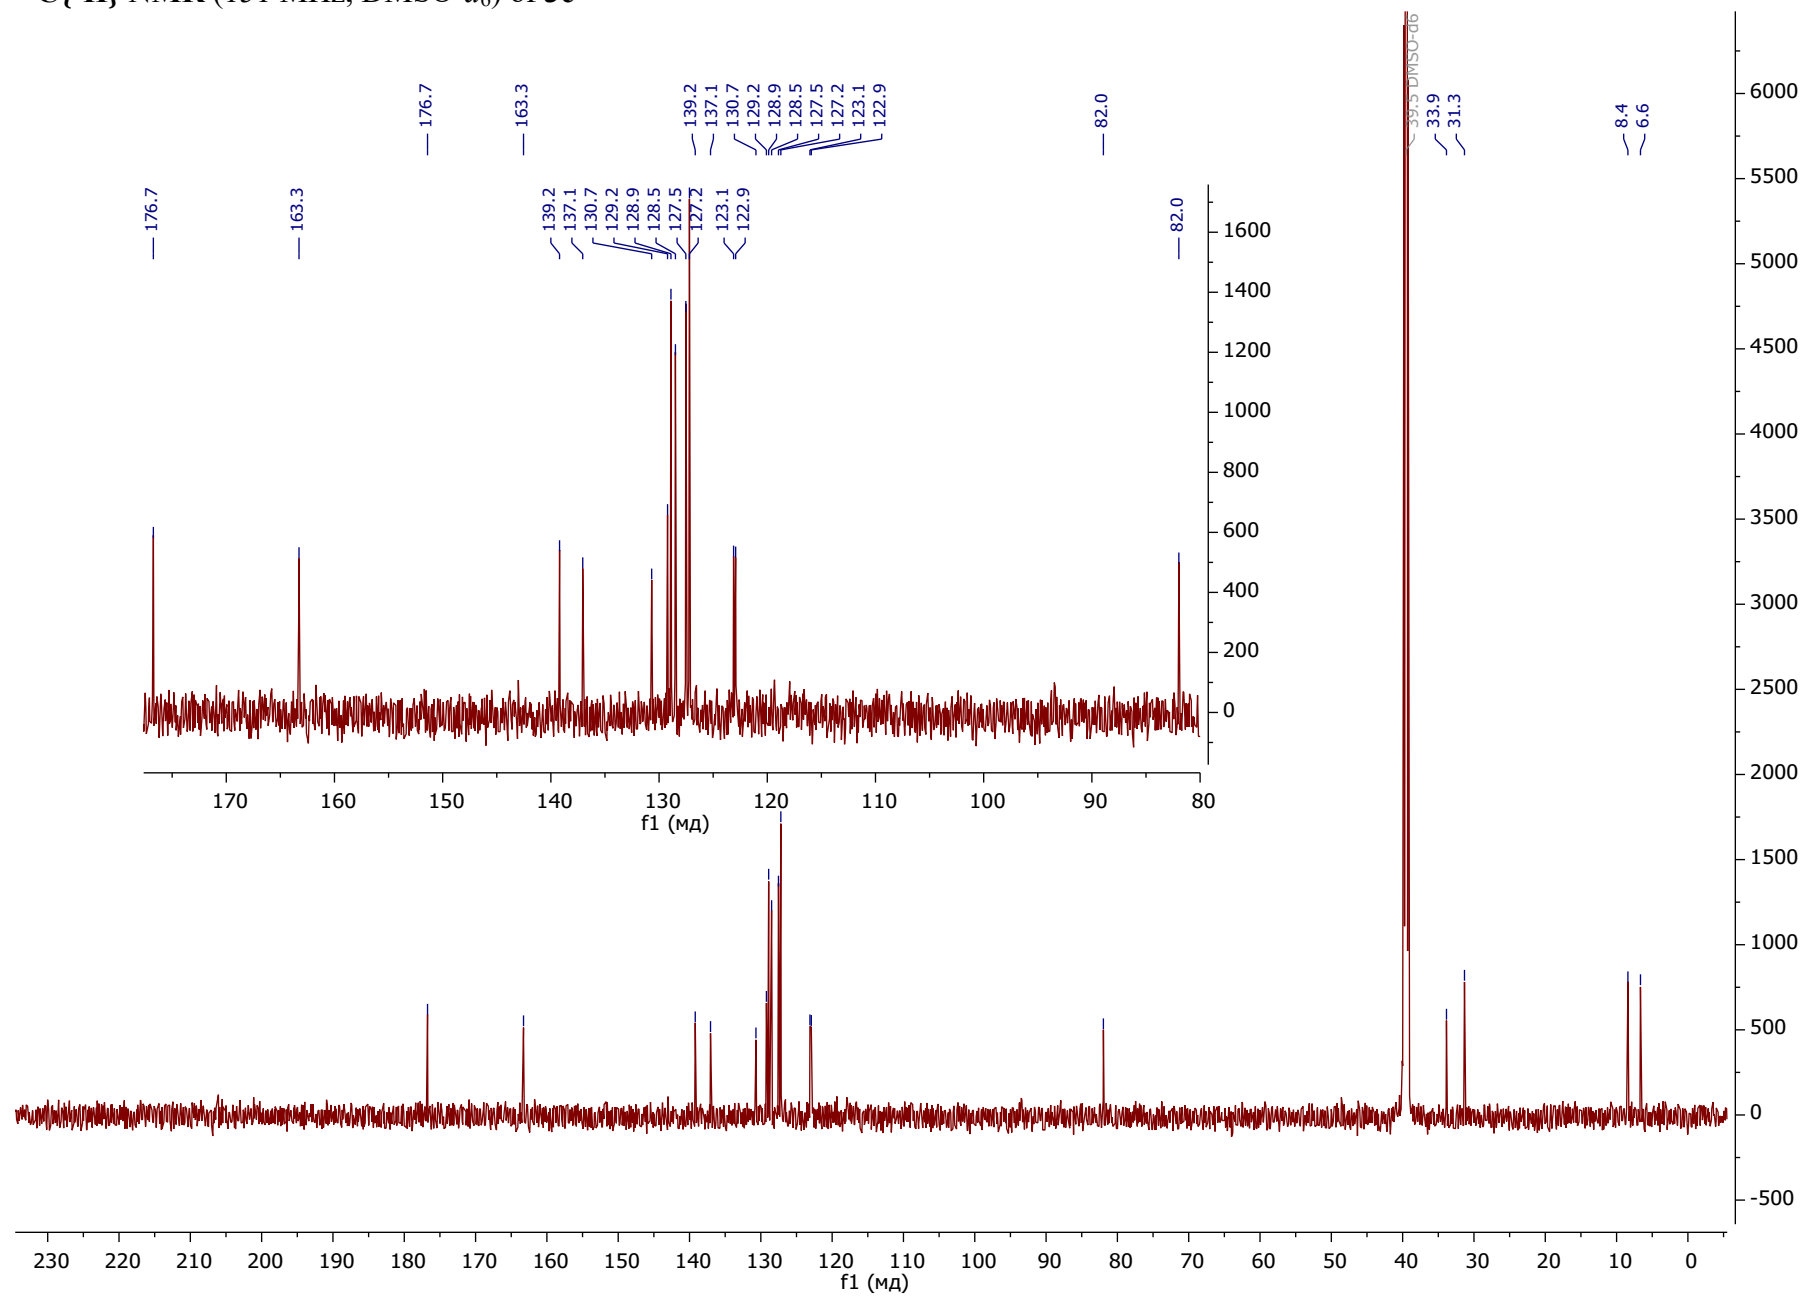



<sup>1</sup>H NMR (300 MHz, DMSO-d<sub>6</sub>) of **3d**

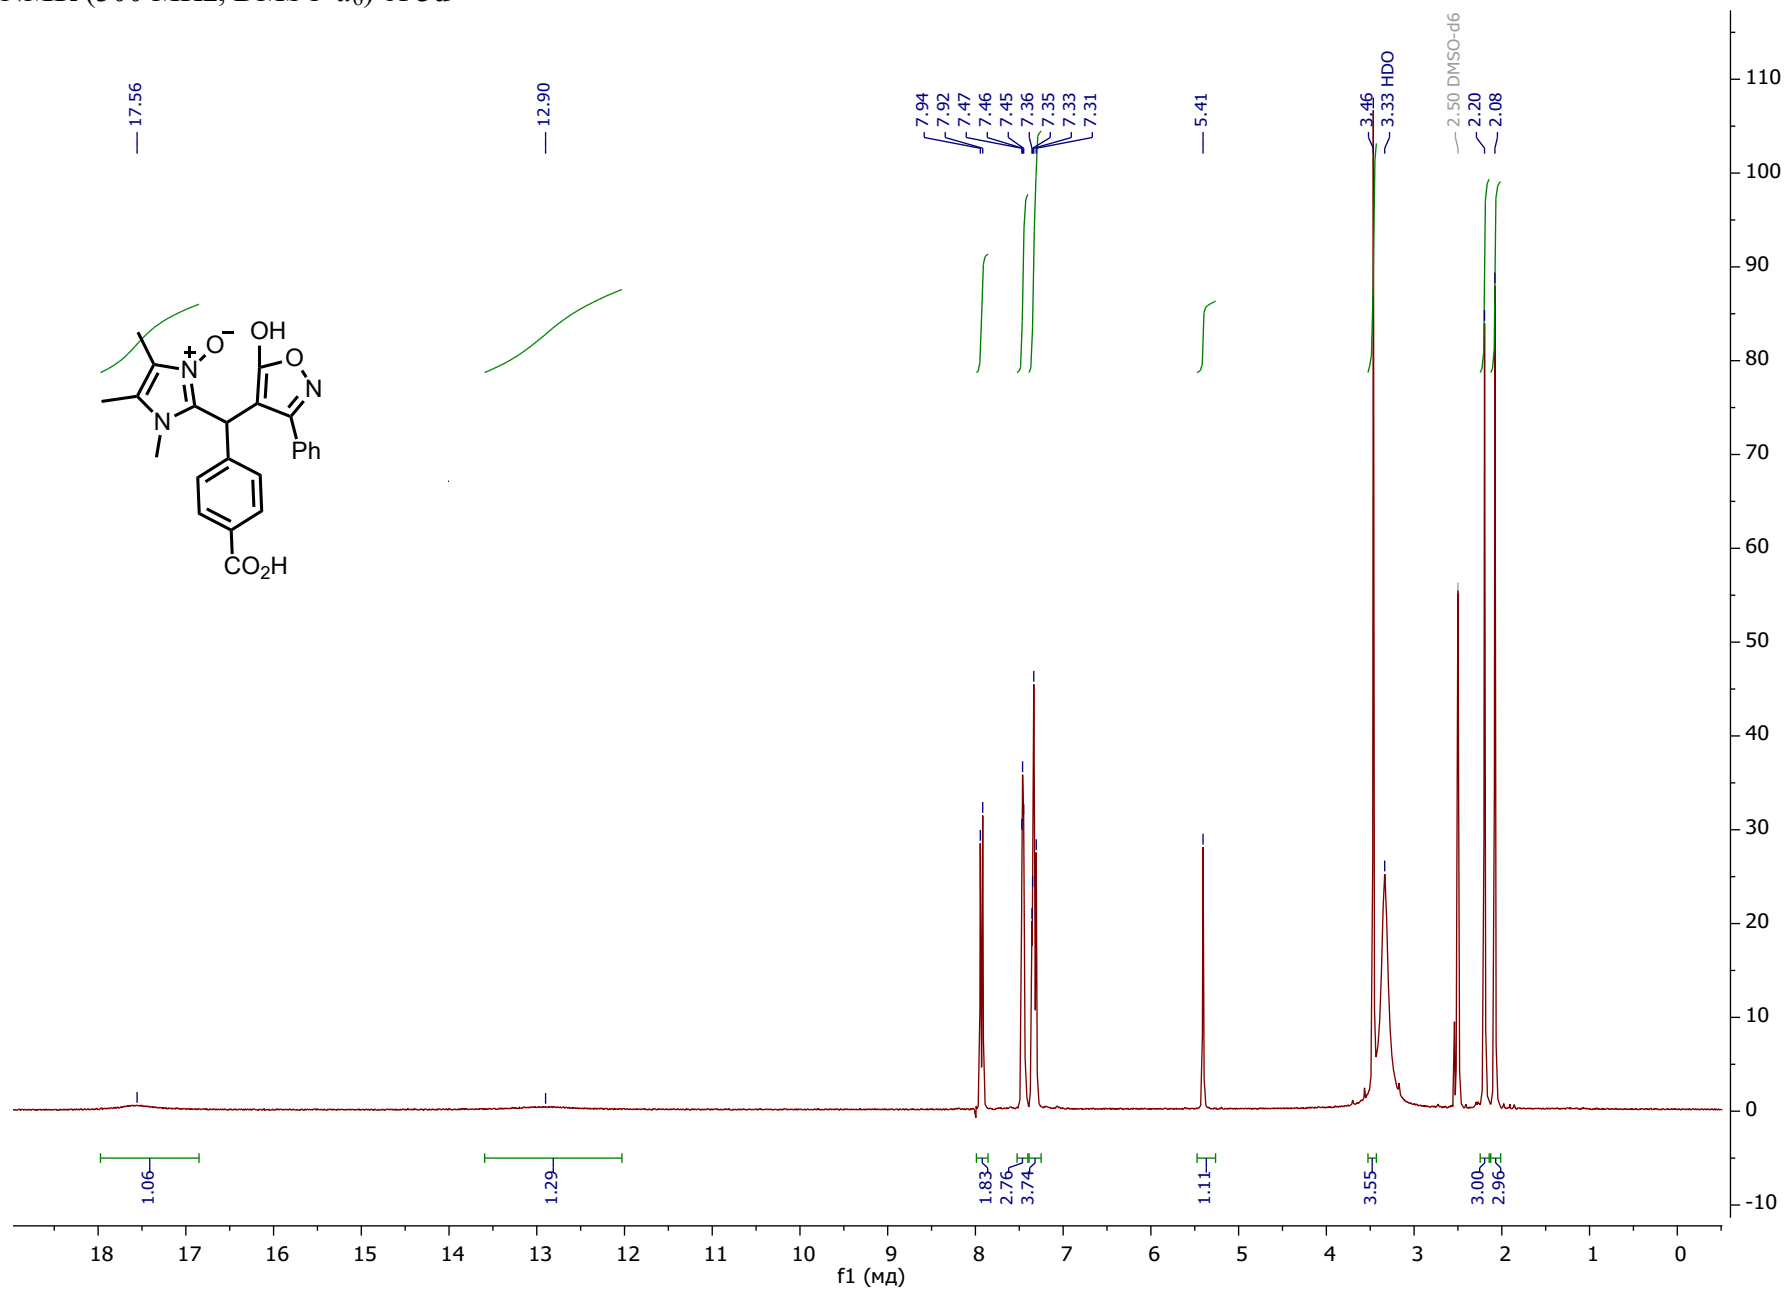

$^{13}\text{C}\{^1\text{H}\}$  NMR (151 MHz,  $\text{DMSO-}d_6$ ) of **3d**

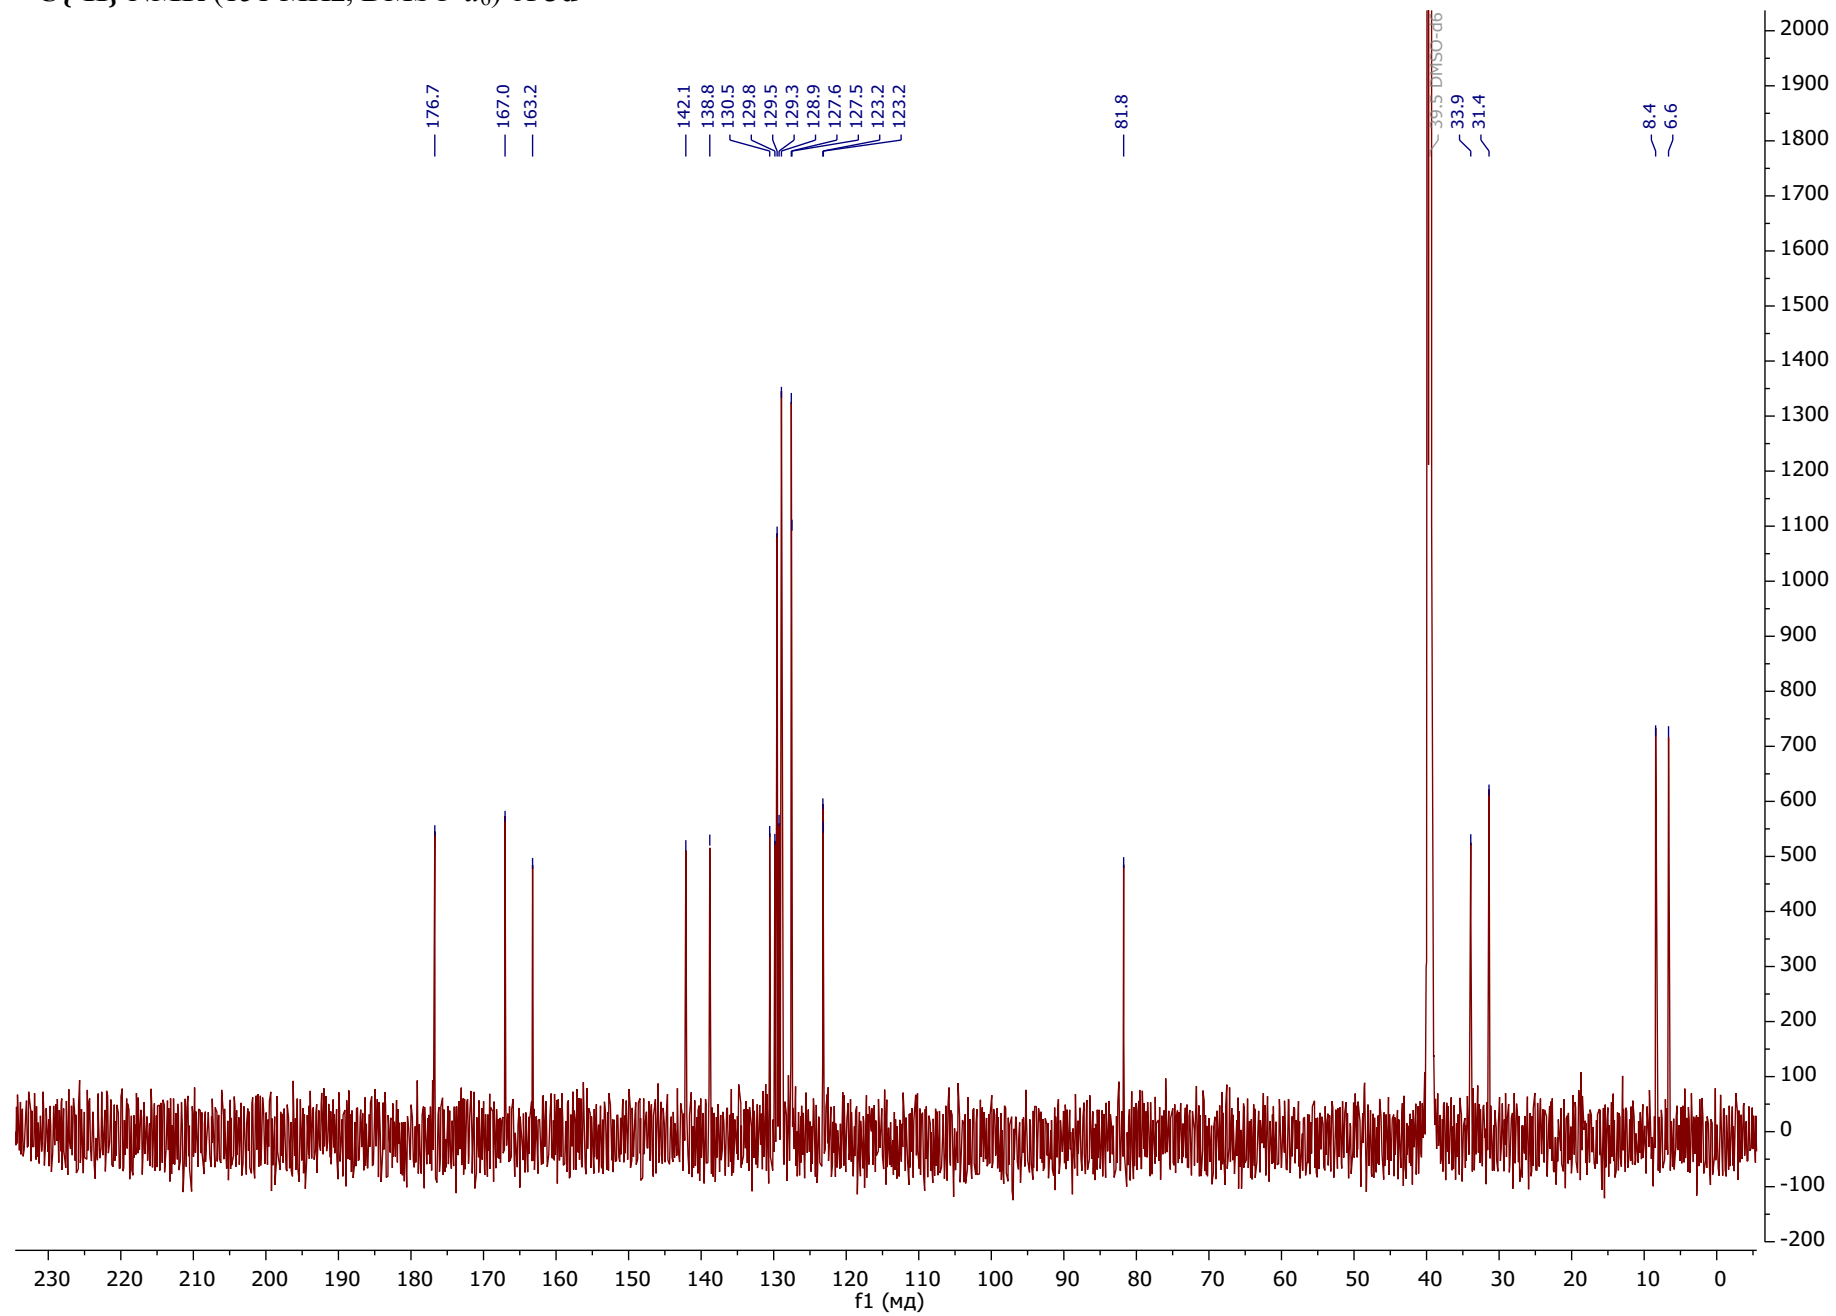

S10

<sup>1</sup>H NMR (400 MHz, DMSO-d<sub>6</sub>) of 3e

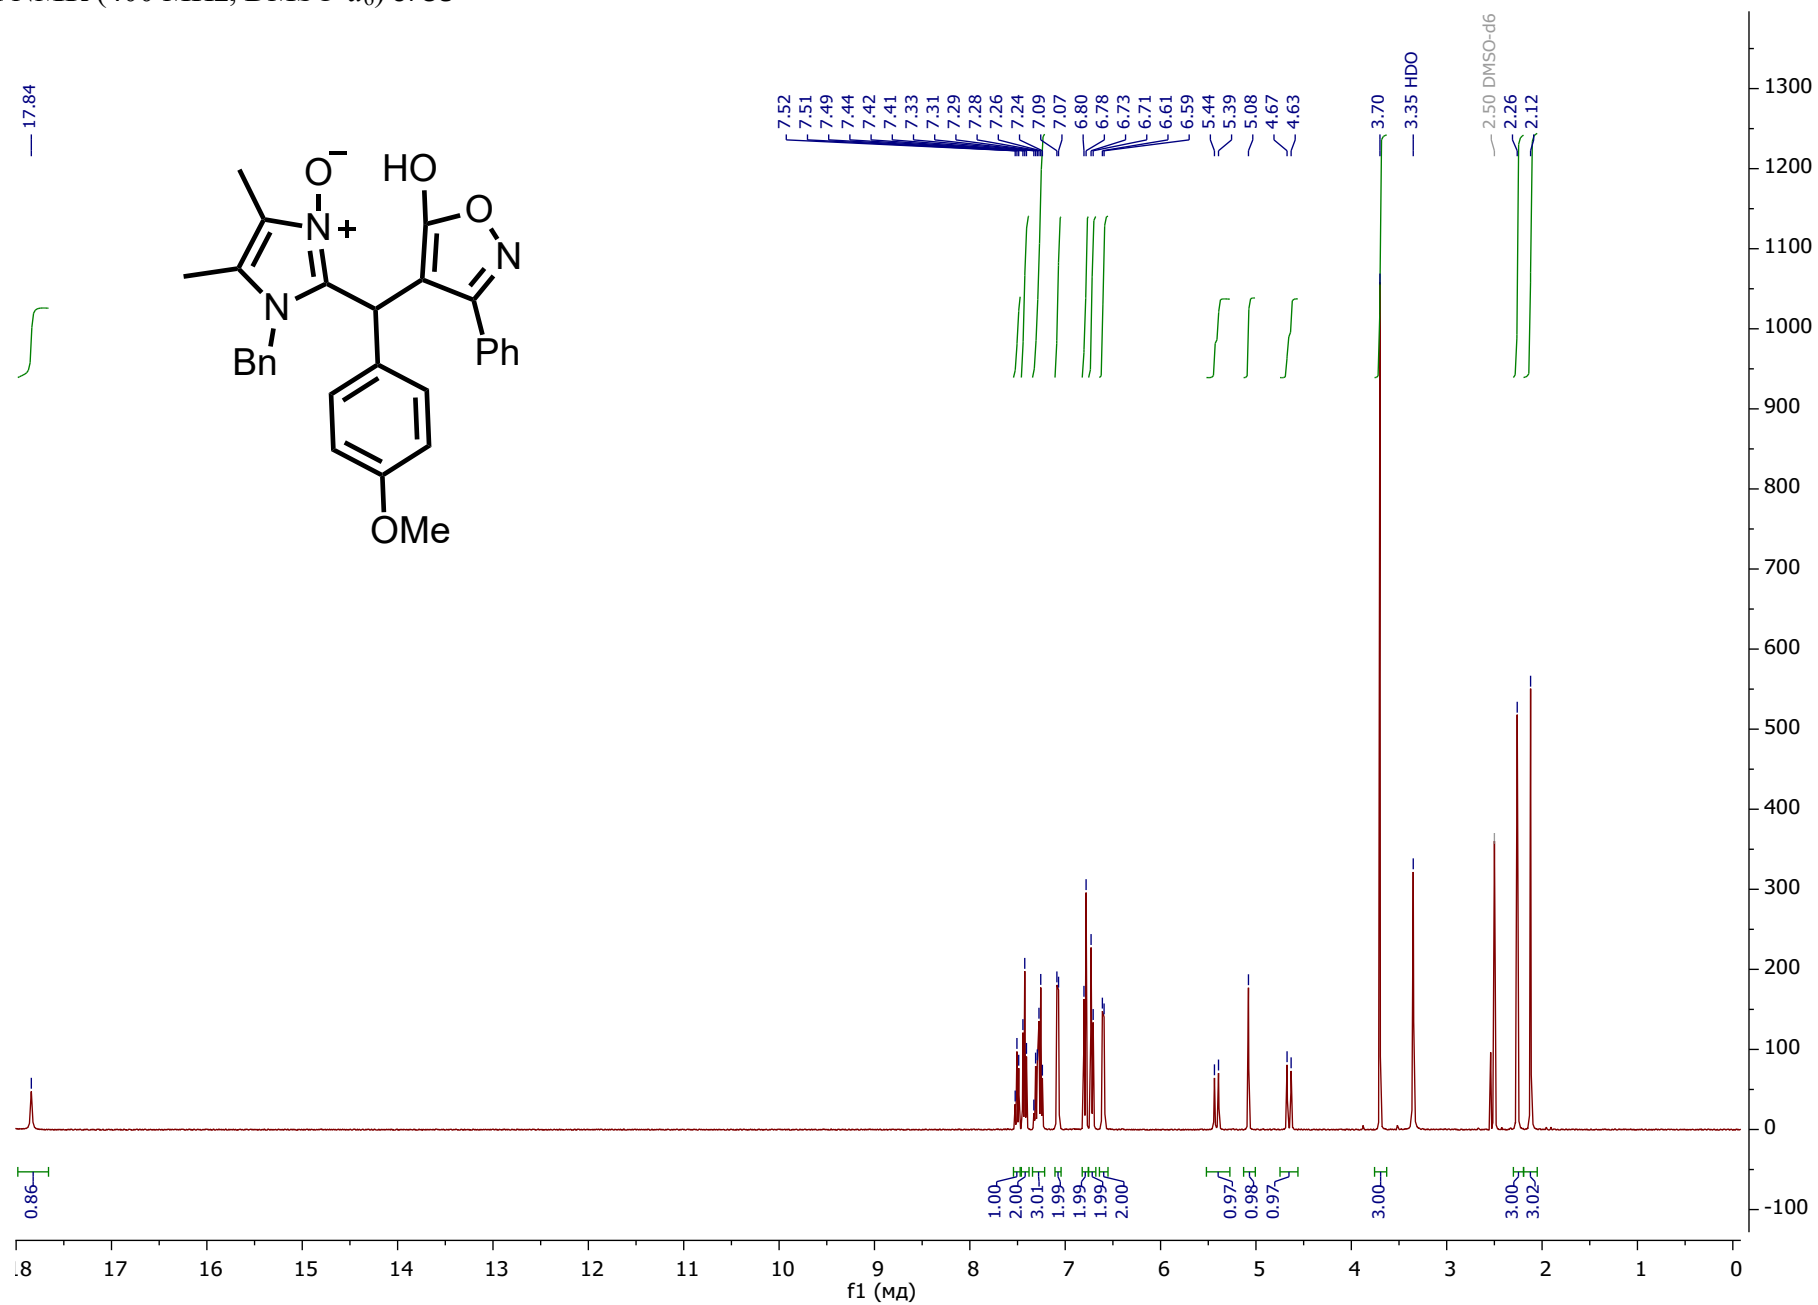

S11

$^{13}\text{C}\{^1\text{H}\}$  NMR (101 MHz,  $\text{DMSO-}d_6$ ) of **3e**

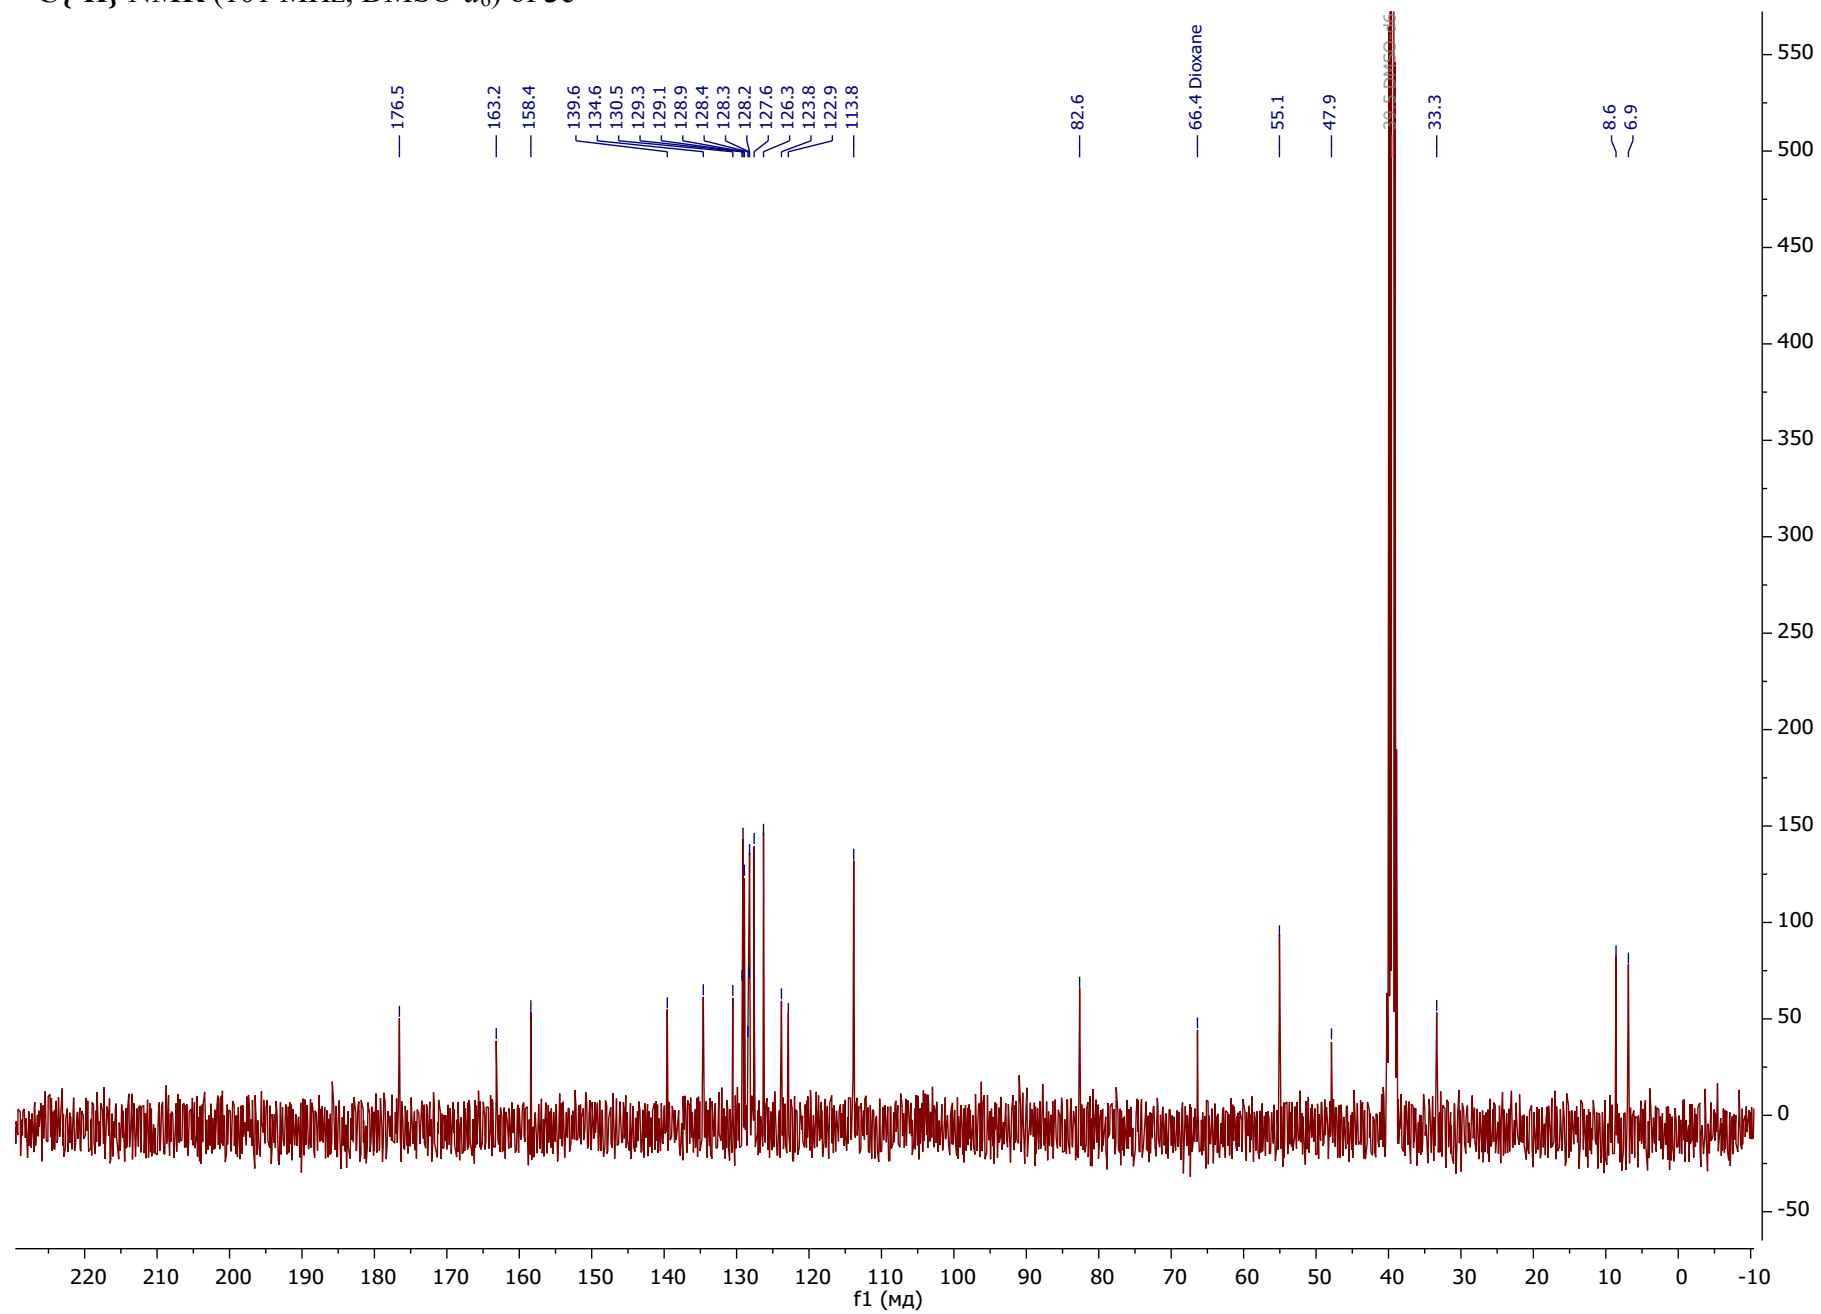

<sup>1</sup>H NMR (400 MHz, DMSO-d<sub>6</sub>) of **3f**

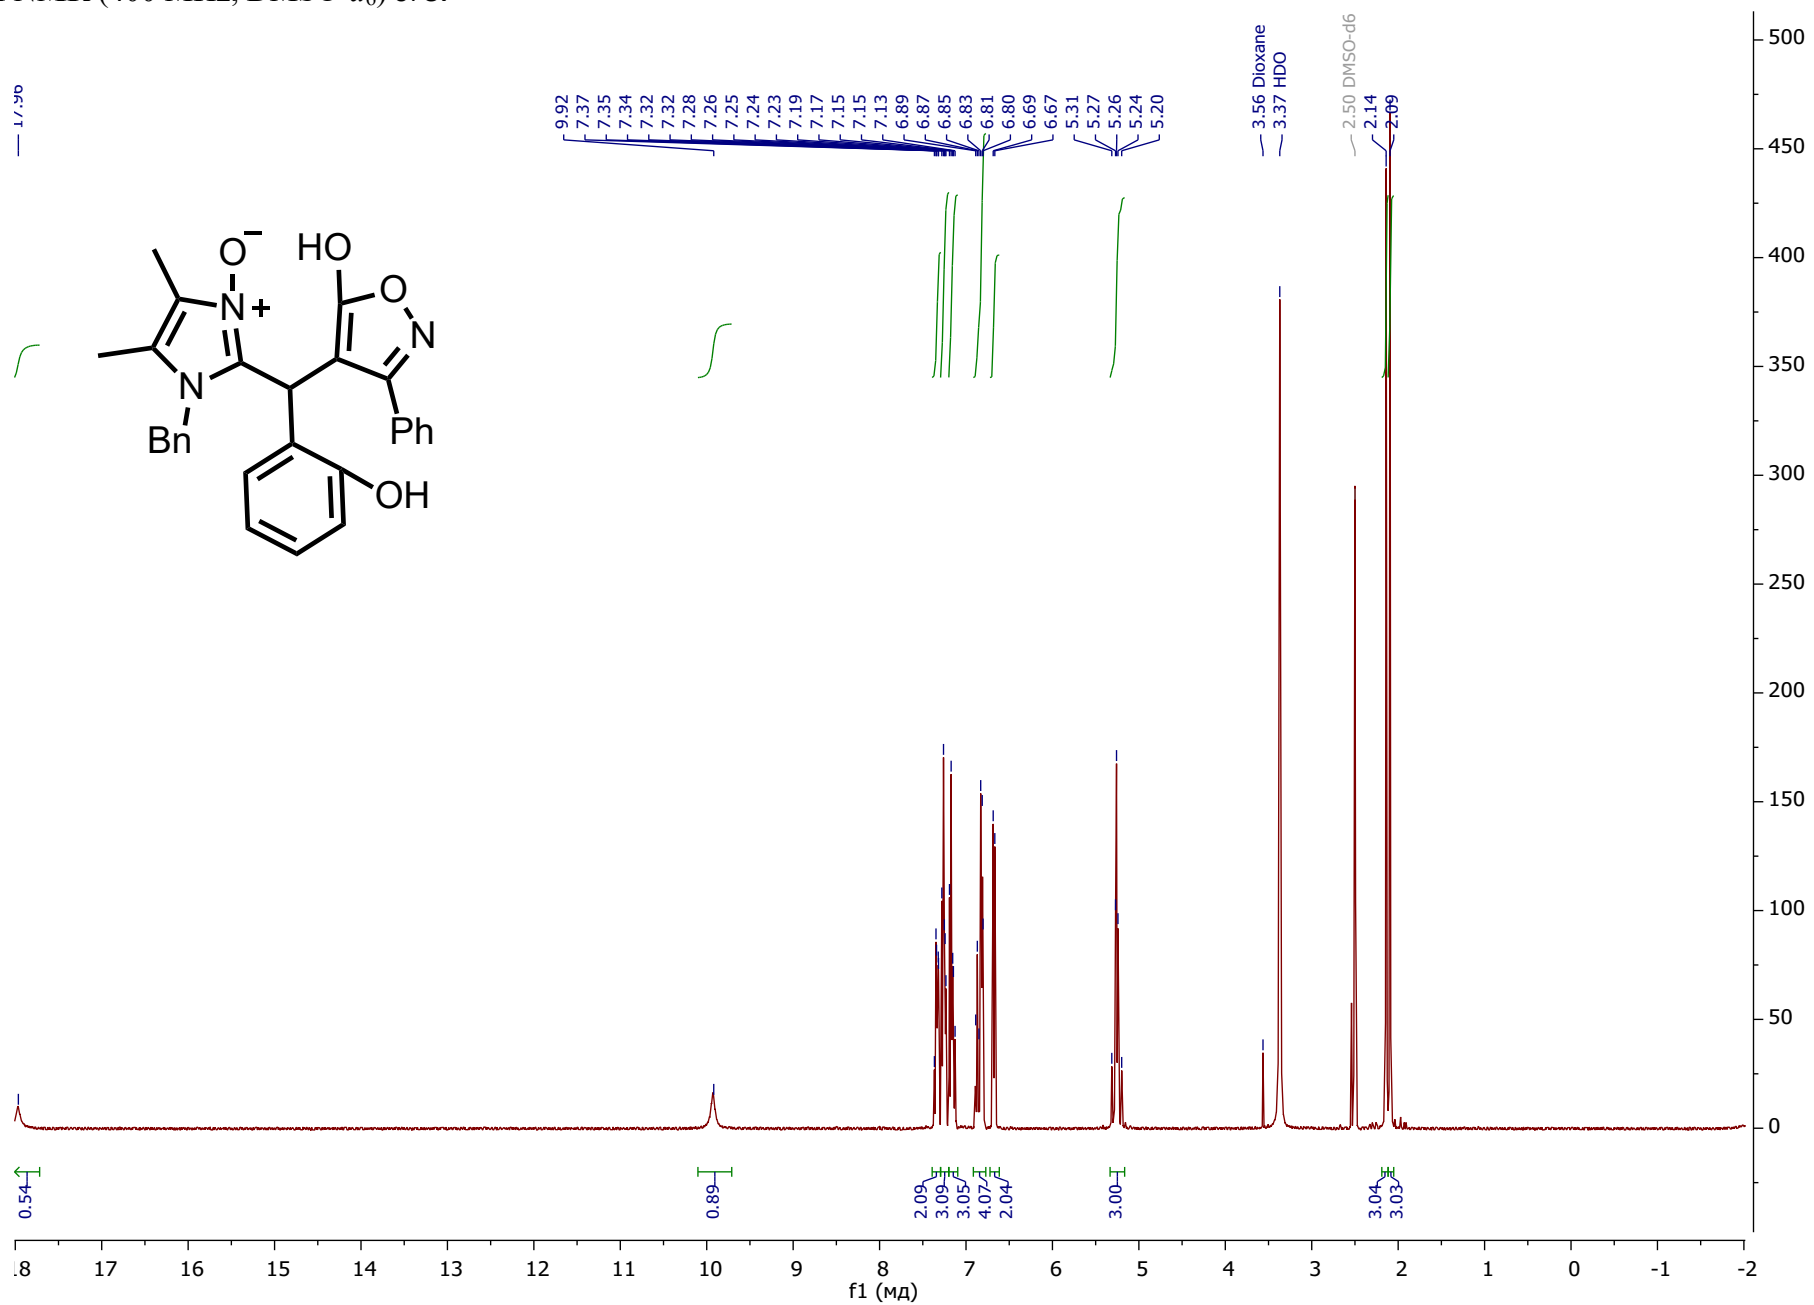

$^{13}\text{C}\{^1\text{H}\}$  NMR (151 MHz,  $\text{DMSO-}d_6$ ) of **3f**

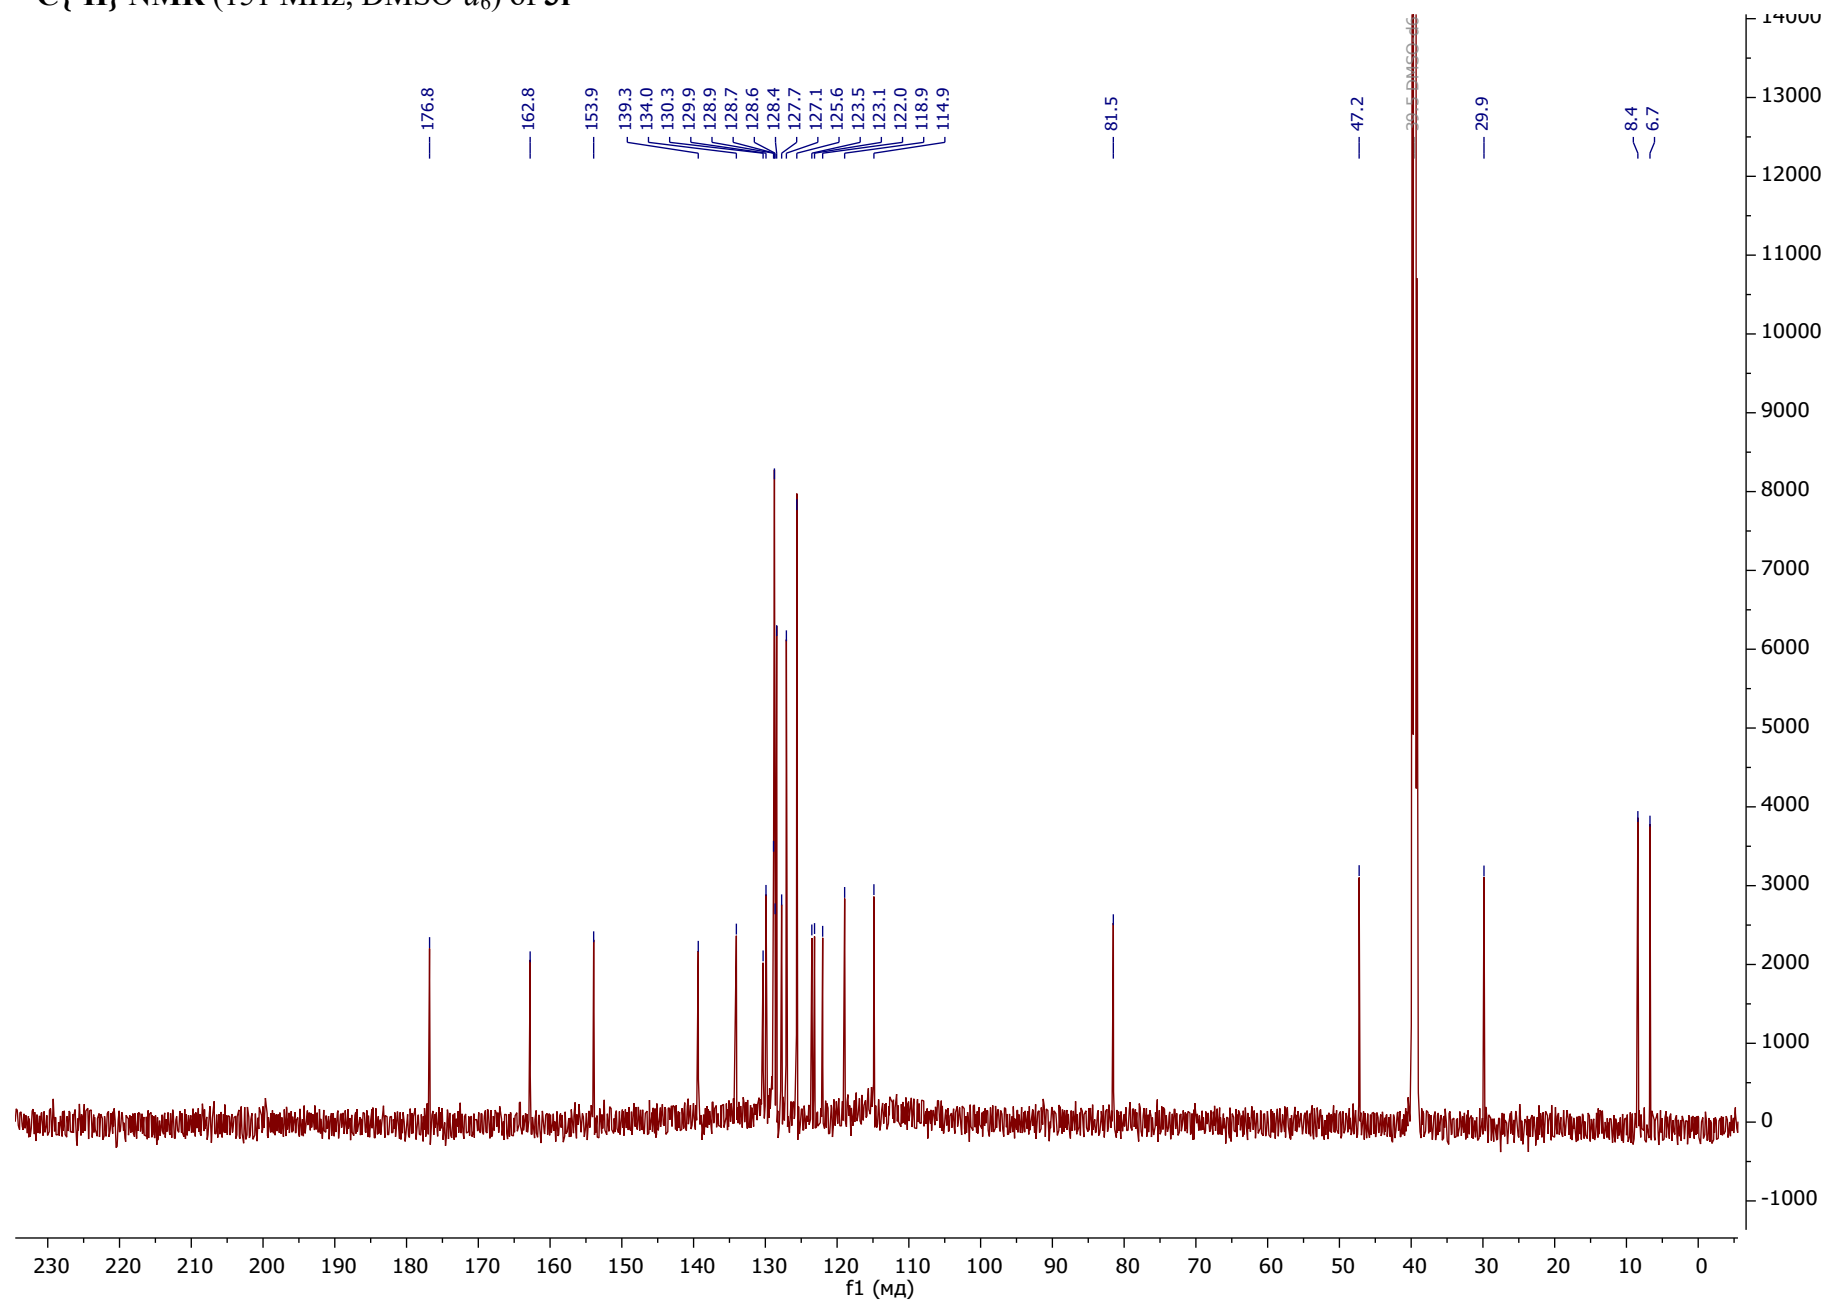

<sup>1</sup>H NMR (400 MHz, DMSO-d<sub>6</sub>) of **3g**

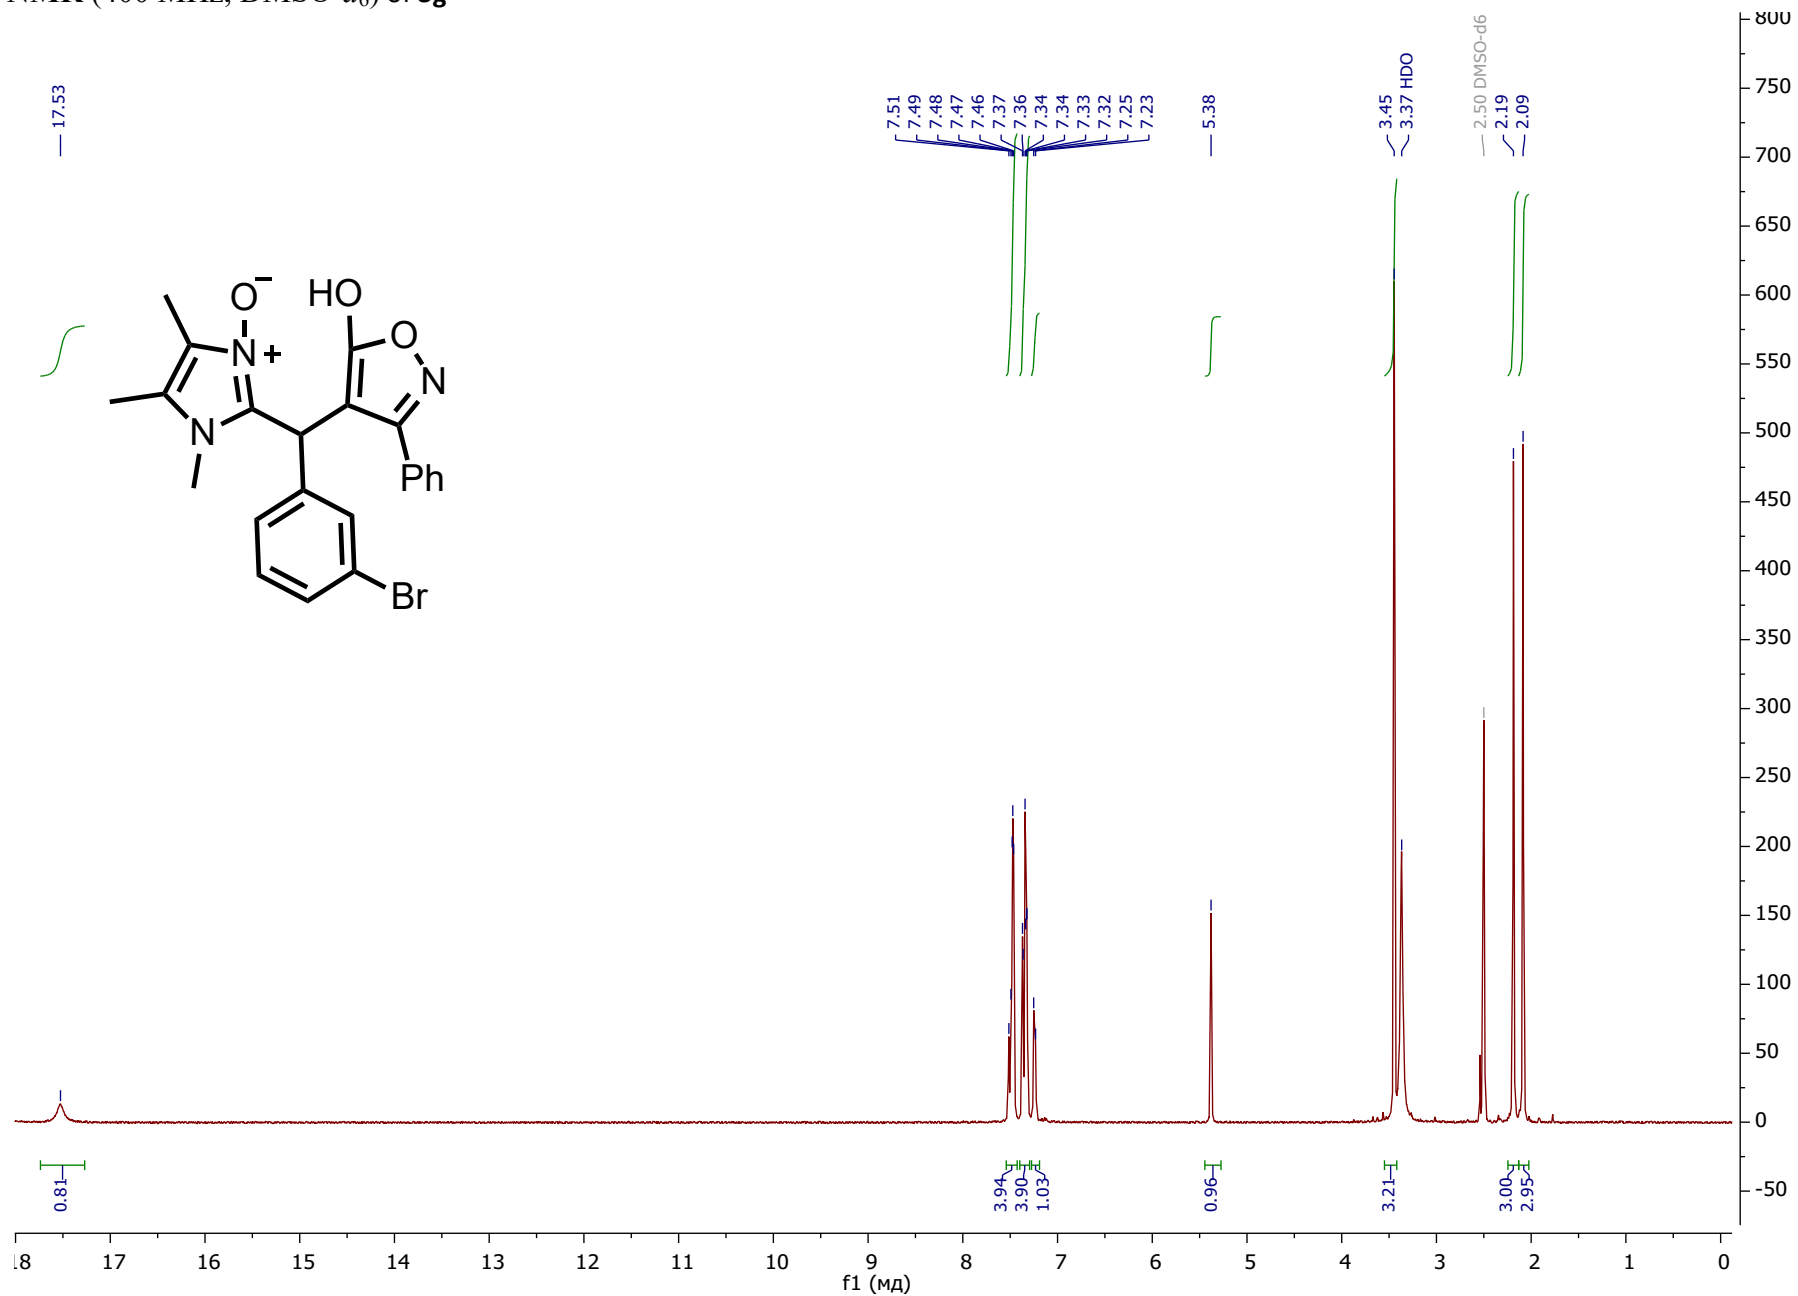

$^{13}\text{C}\{^1\text{H}\}$  NMR (151 MHz, DMSO- $d_6$ ) of **3g**

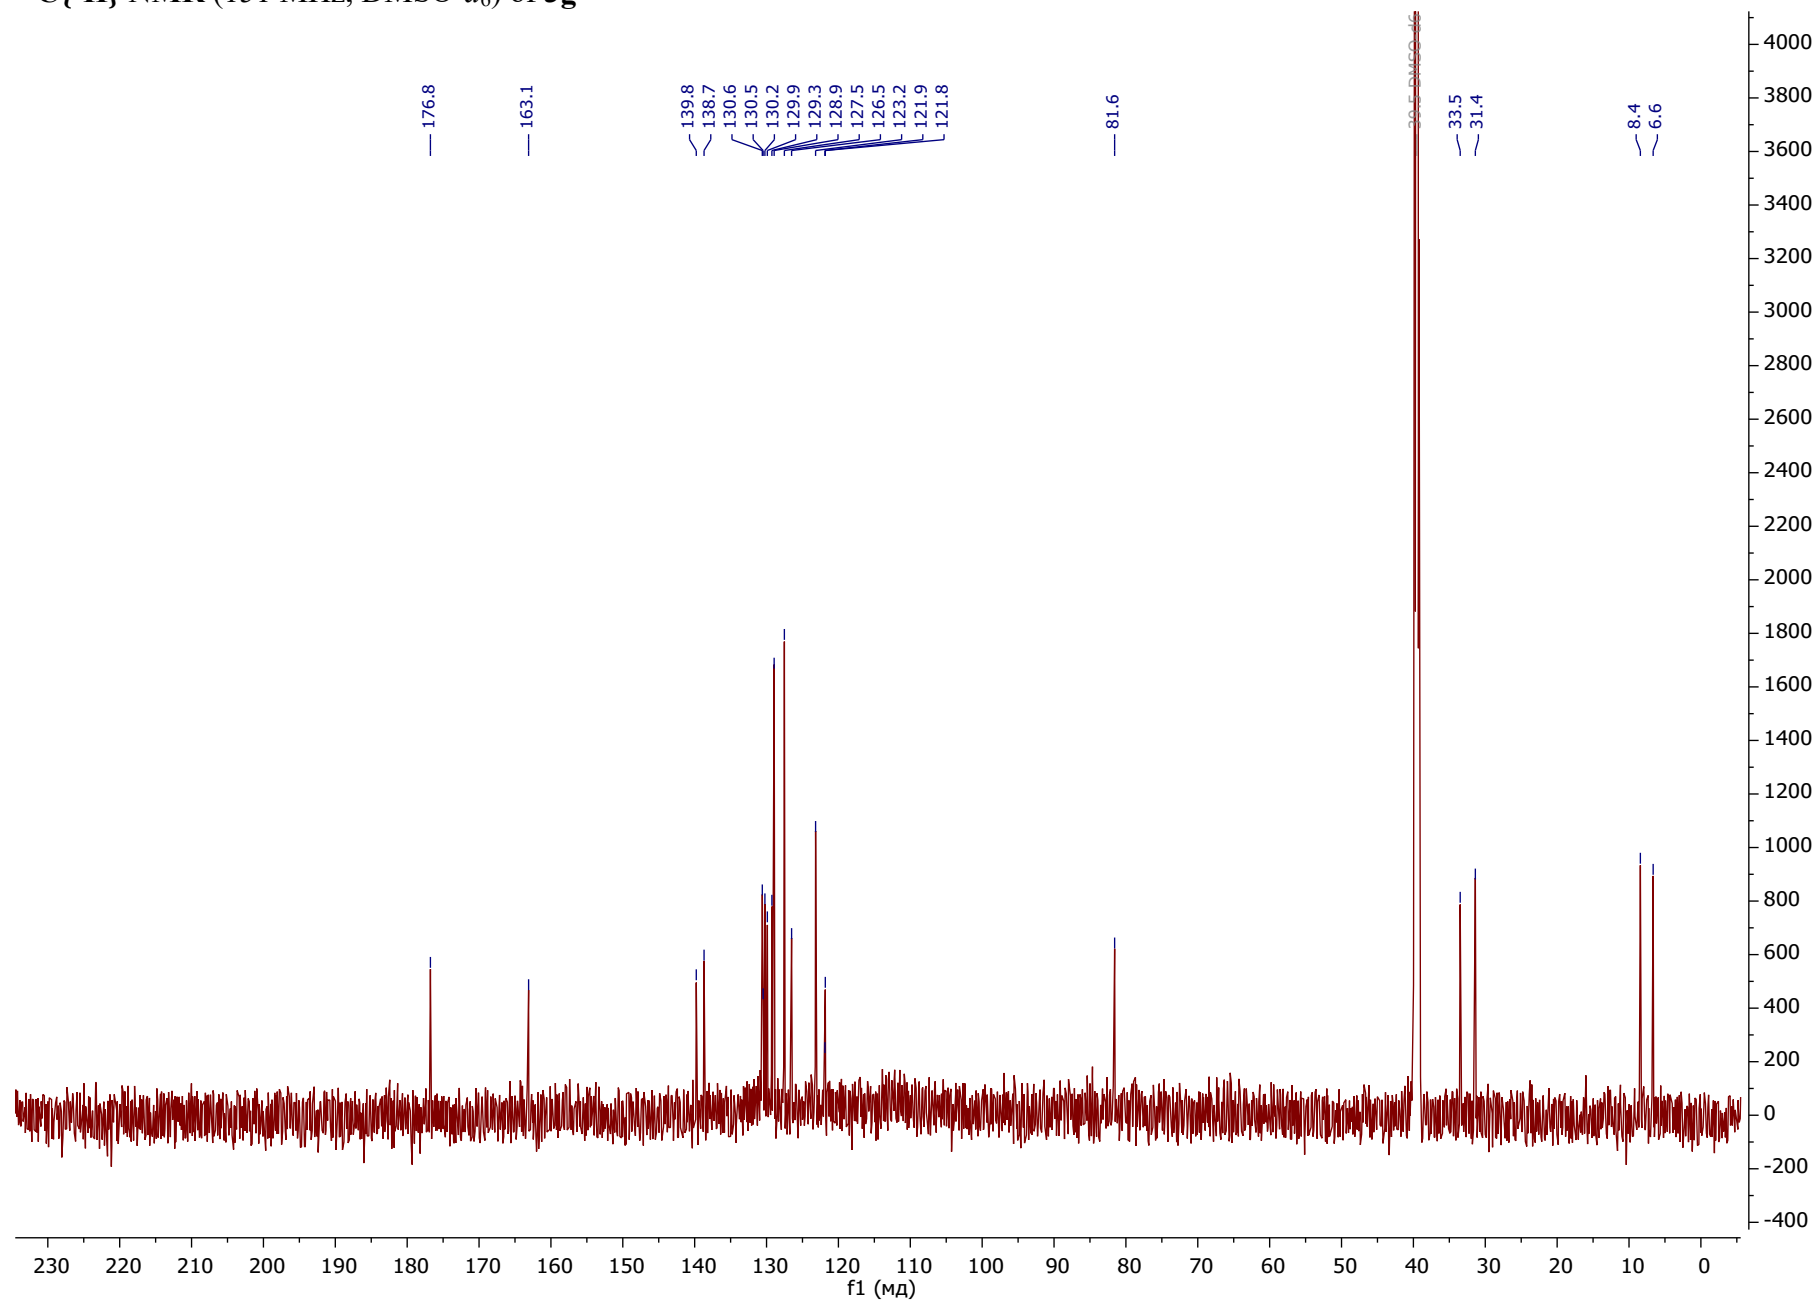



<sup>1</sup>H NMR (300 MHz, DMSO-d<sub>6</sub>) of **3h**

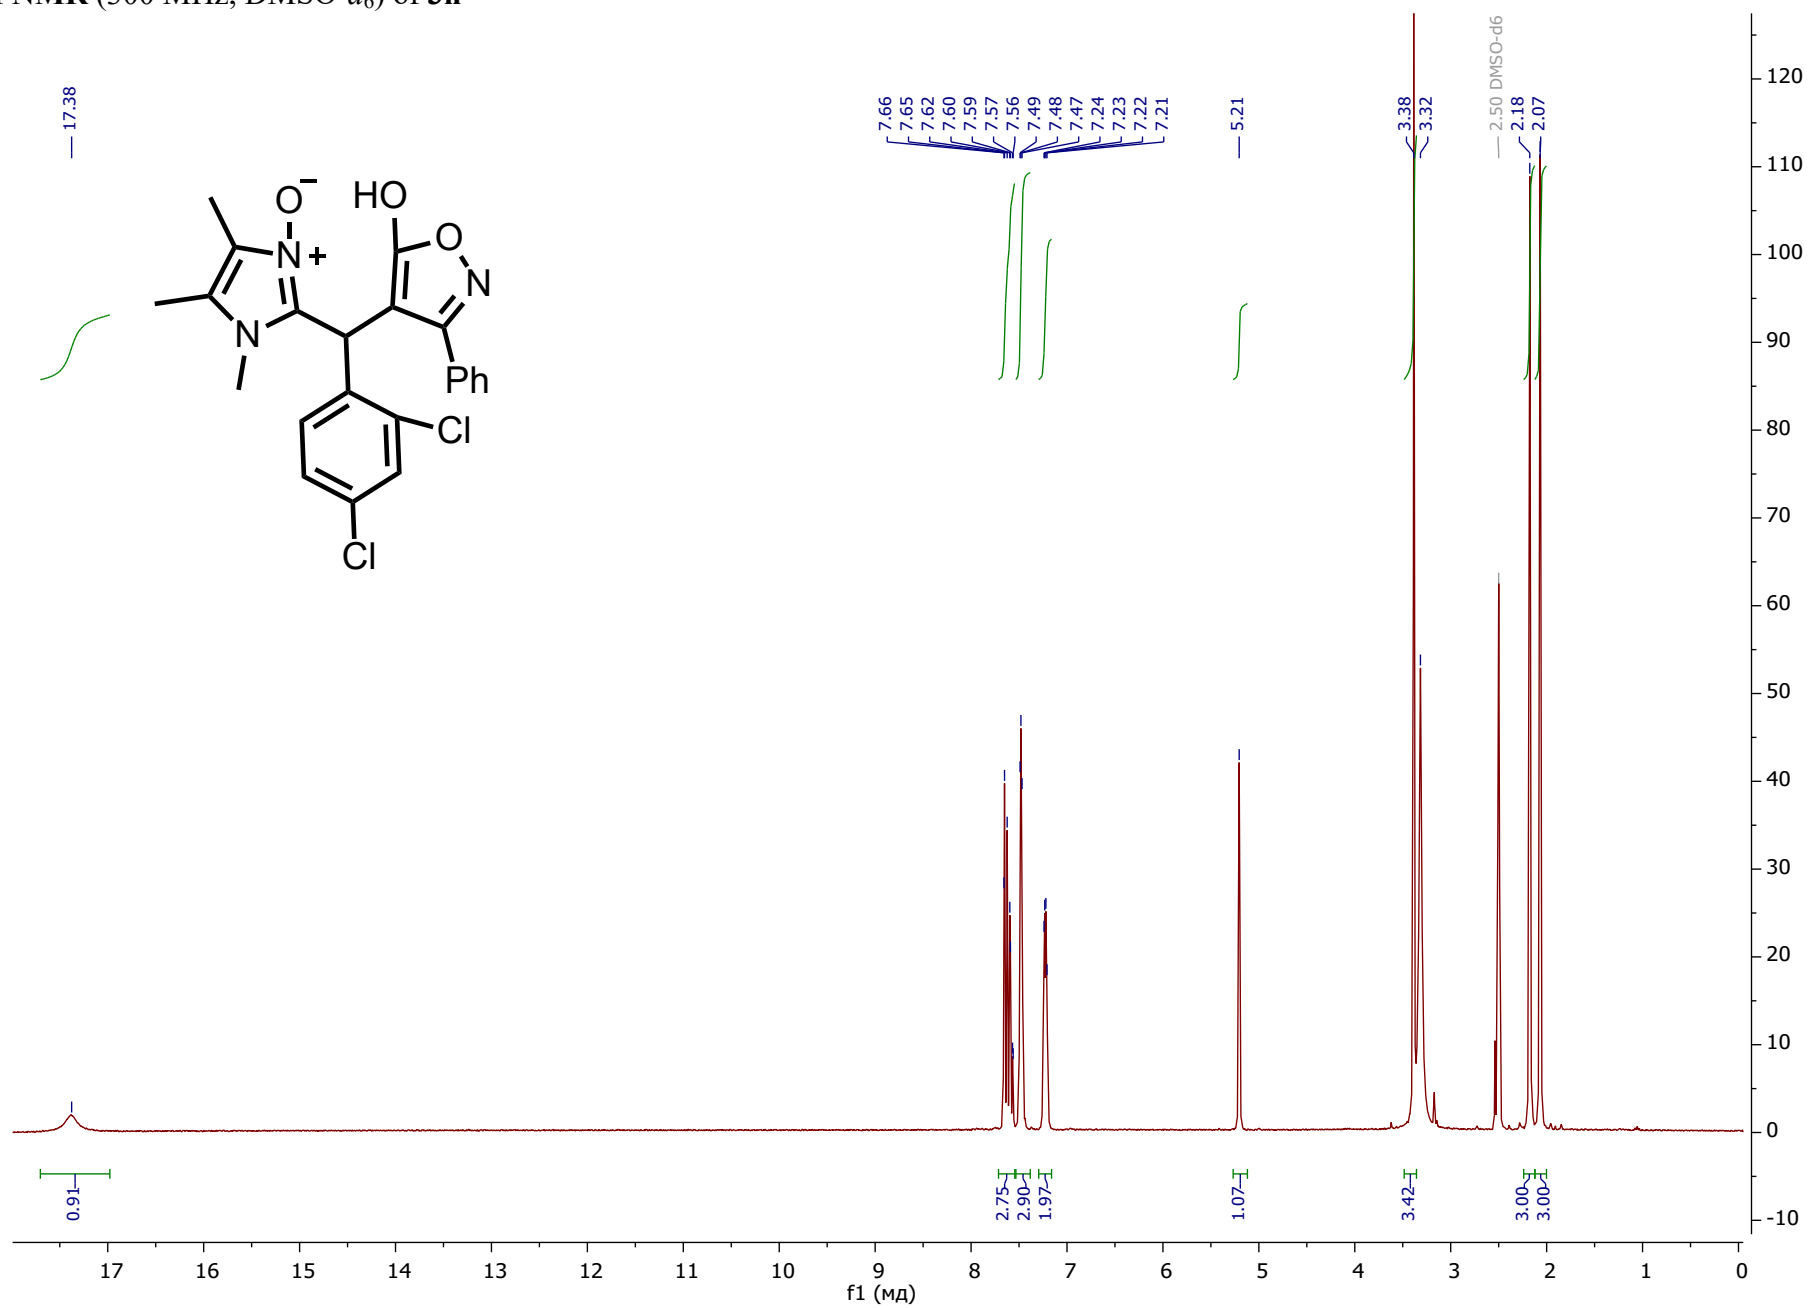

$^{13}\text{C}\{^1\text{H}\}$  NMR (151 MHz, DMSO- $d_6$ ) of **3h**

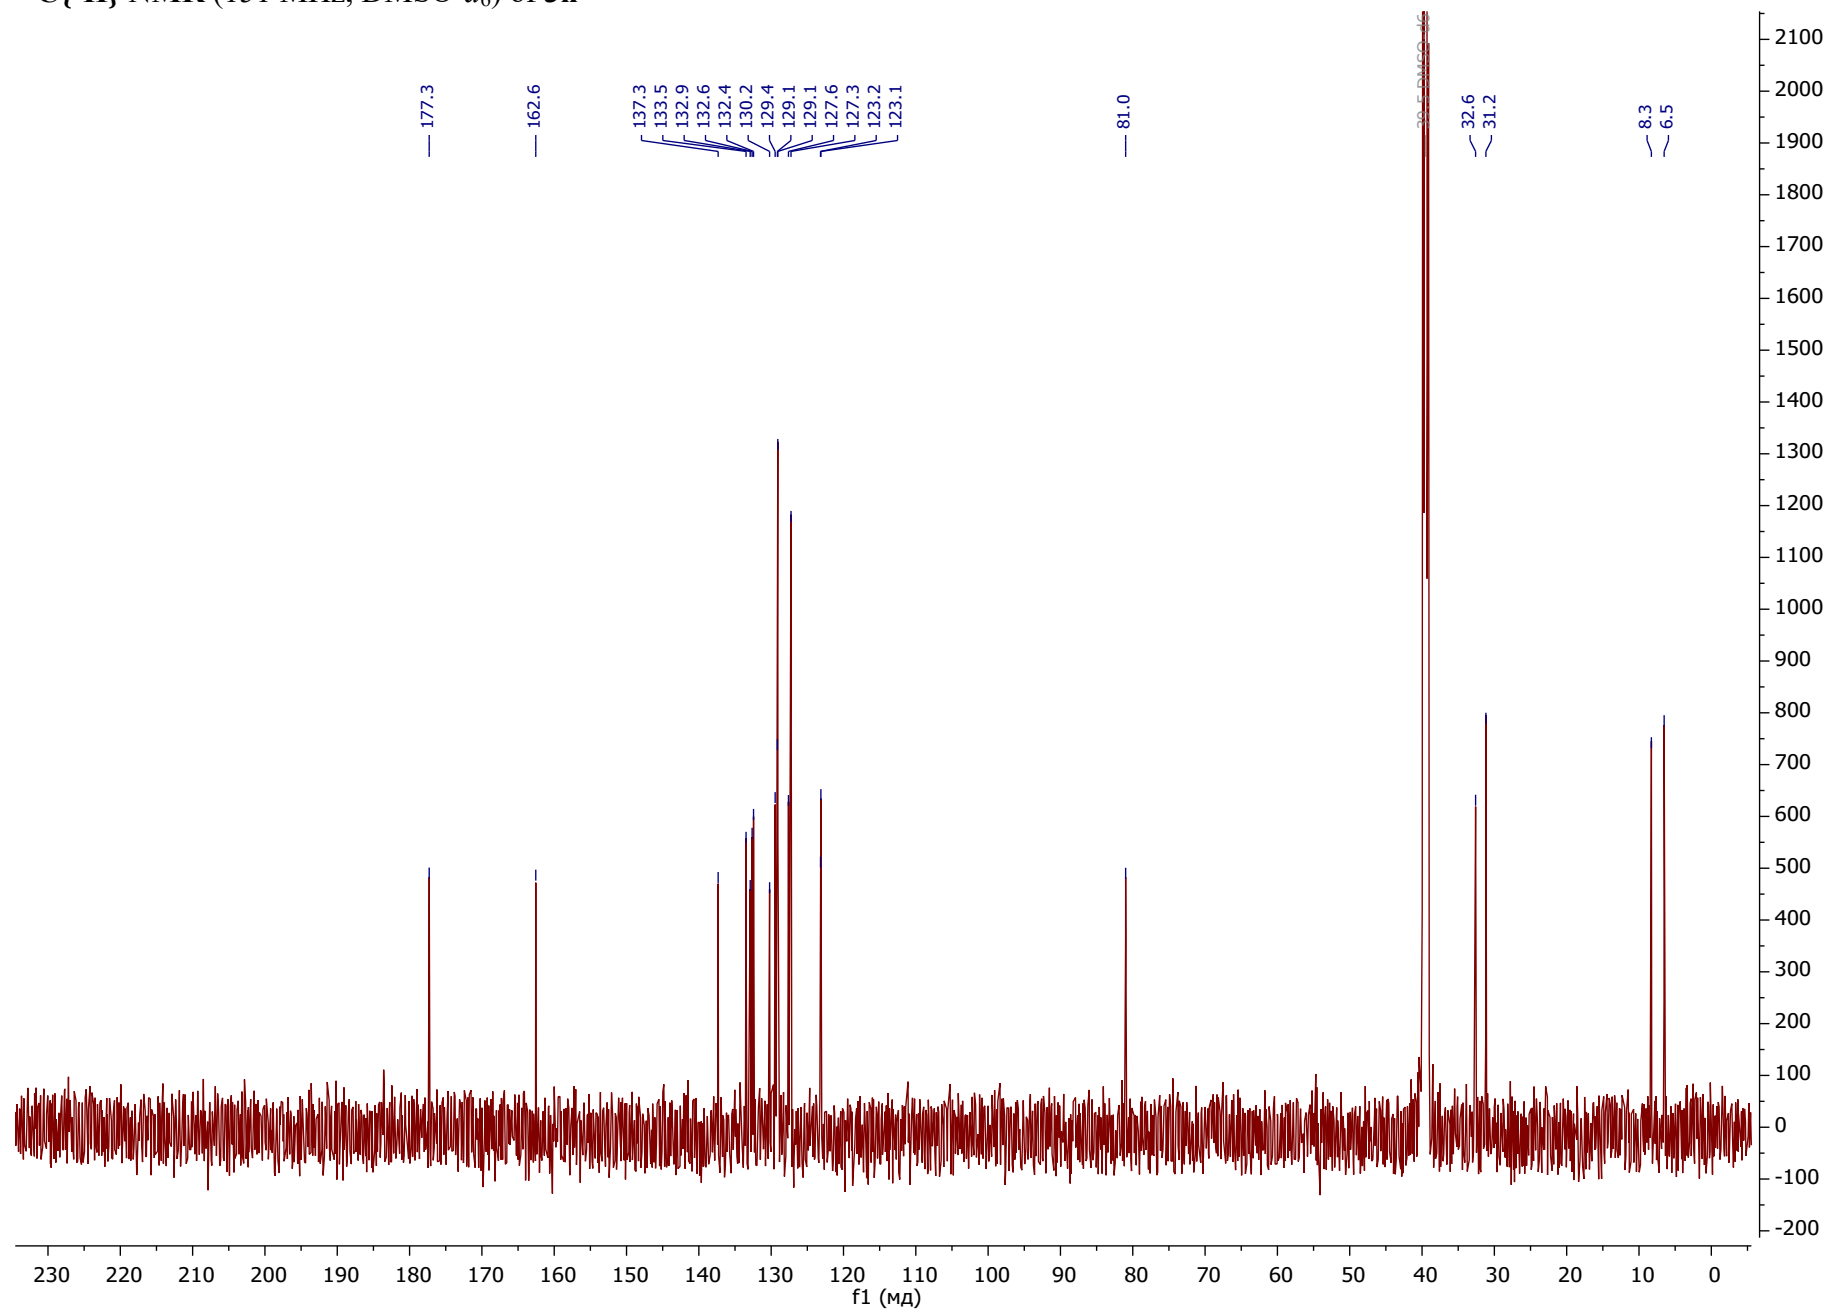

<sup>1</sup>H NMR (400 MHz, DMSO-d<sub>6</sub>) of 3i

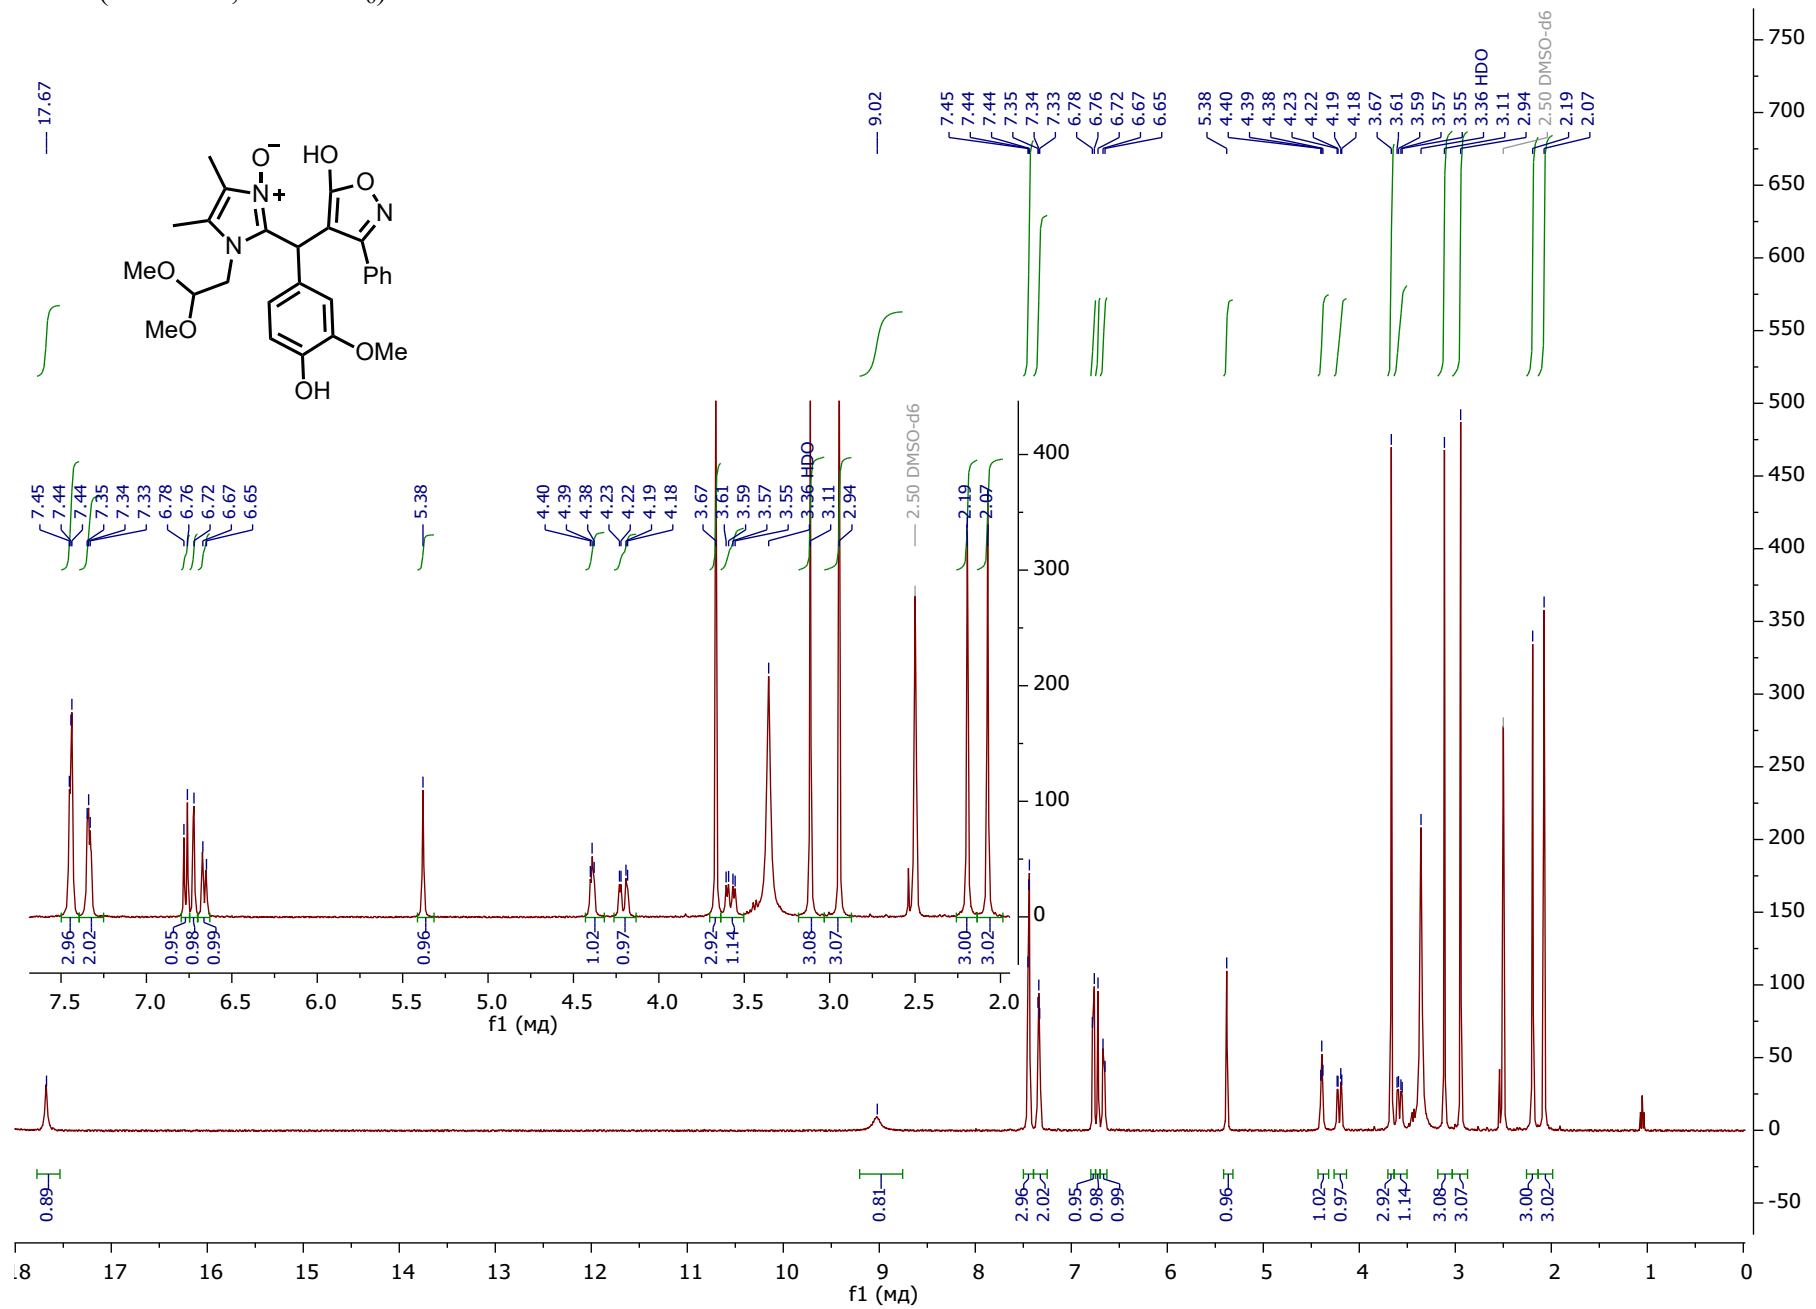

$^{13}\text{C}\{^1\text{H}\}$  NMR (151 MHz,  $\text{DMSO-}d_6$ ) of **3i**

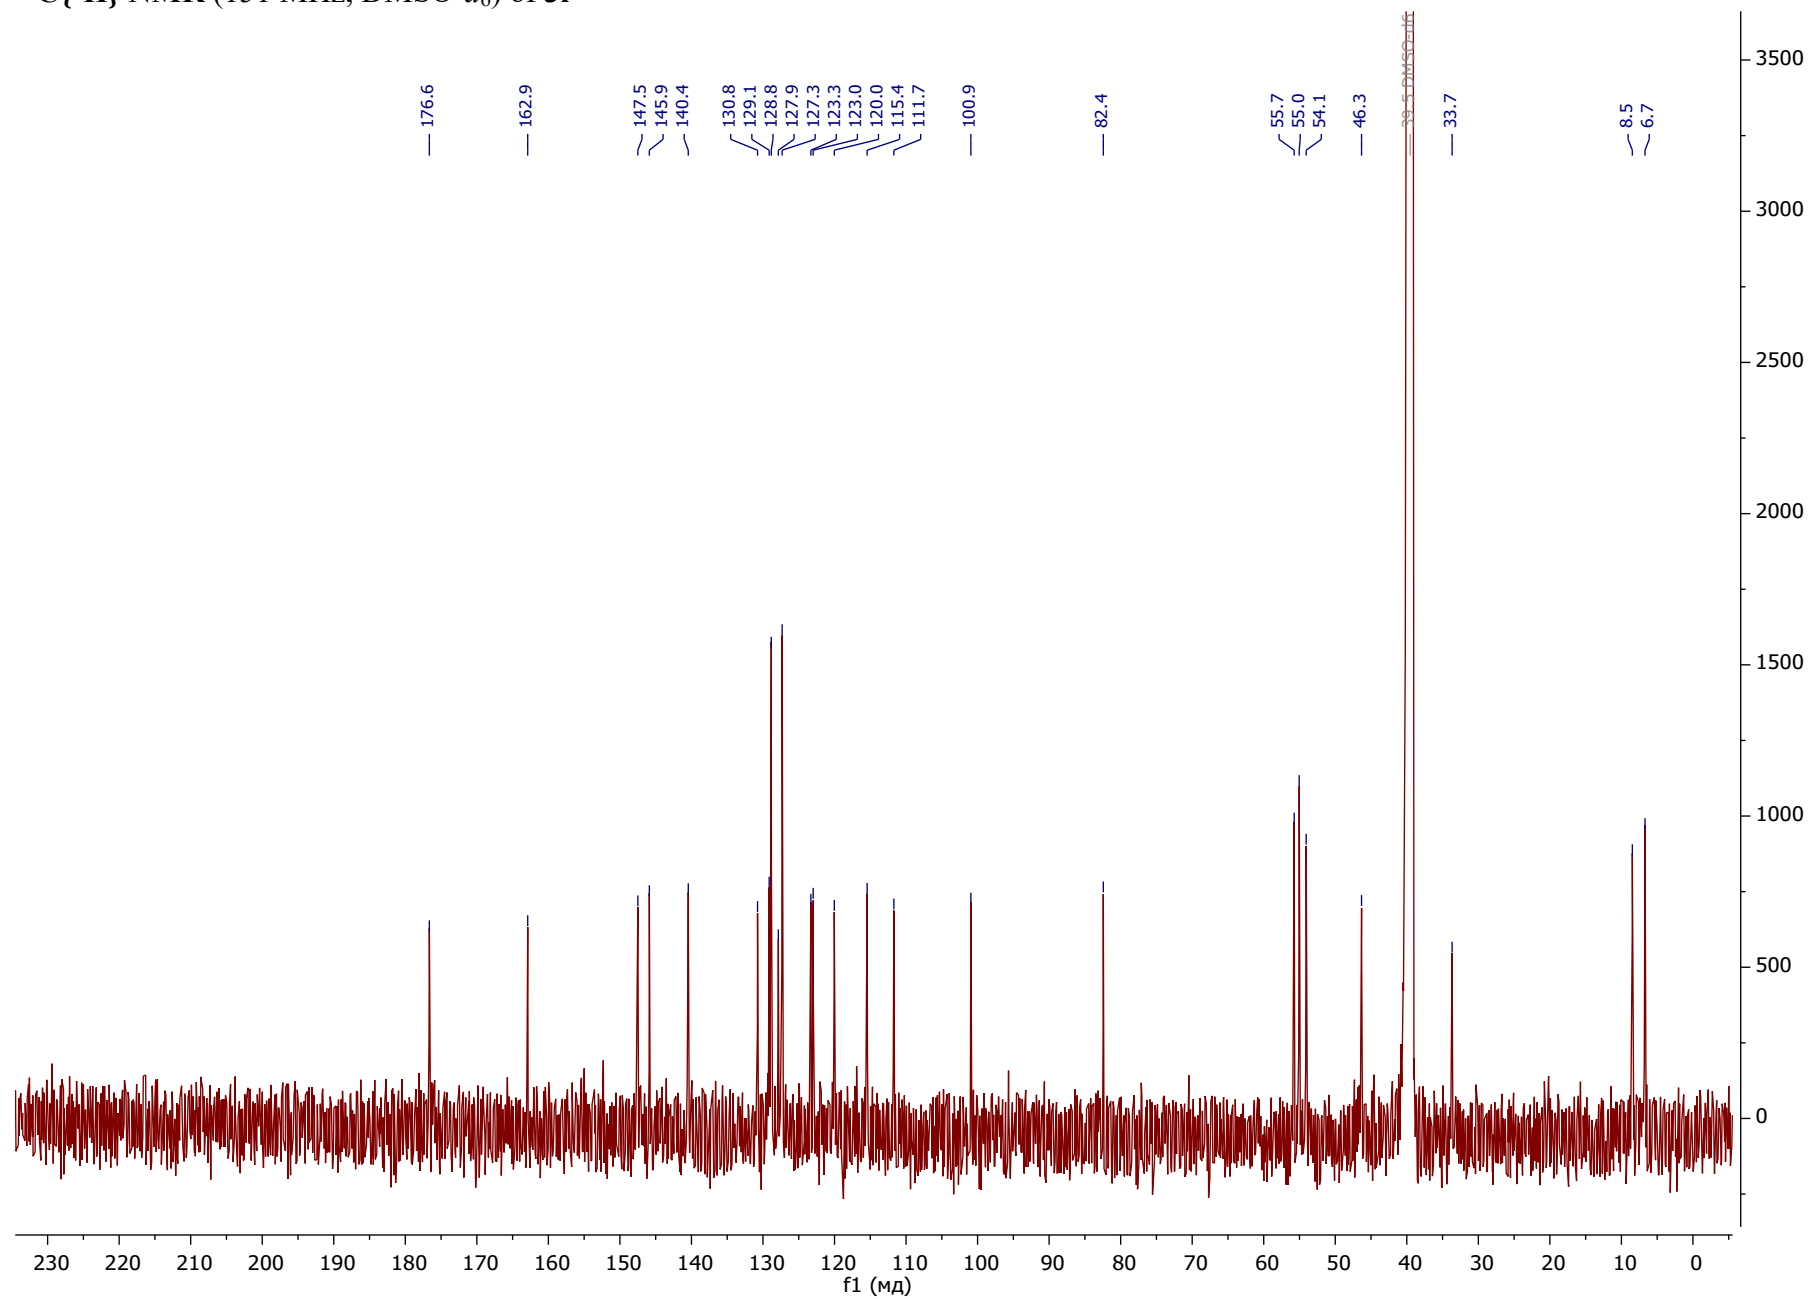

<sup>1</sup>H NMR (400 MHz, DMSO-d<sub>6</sub>) of **3j**

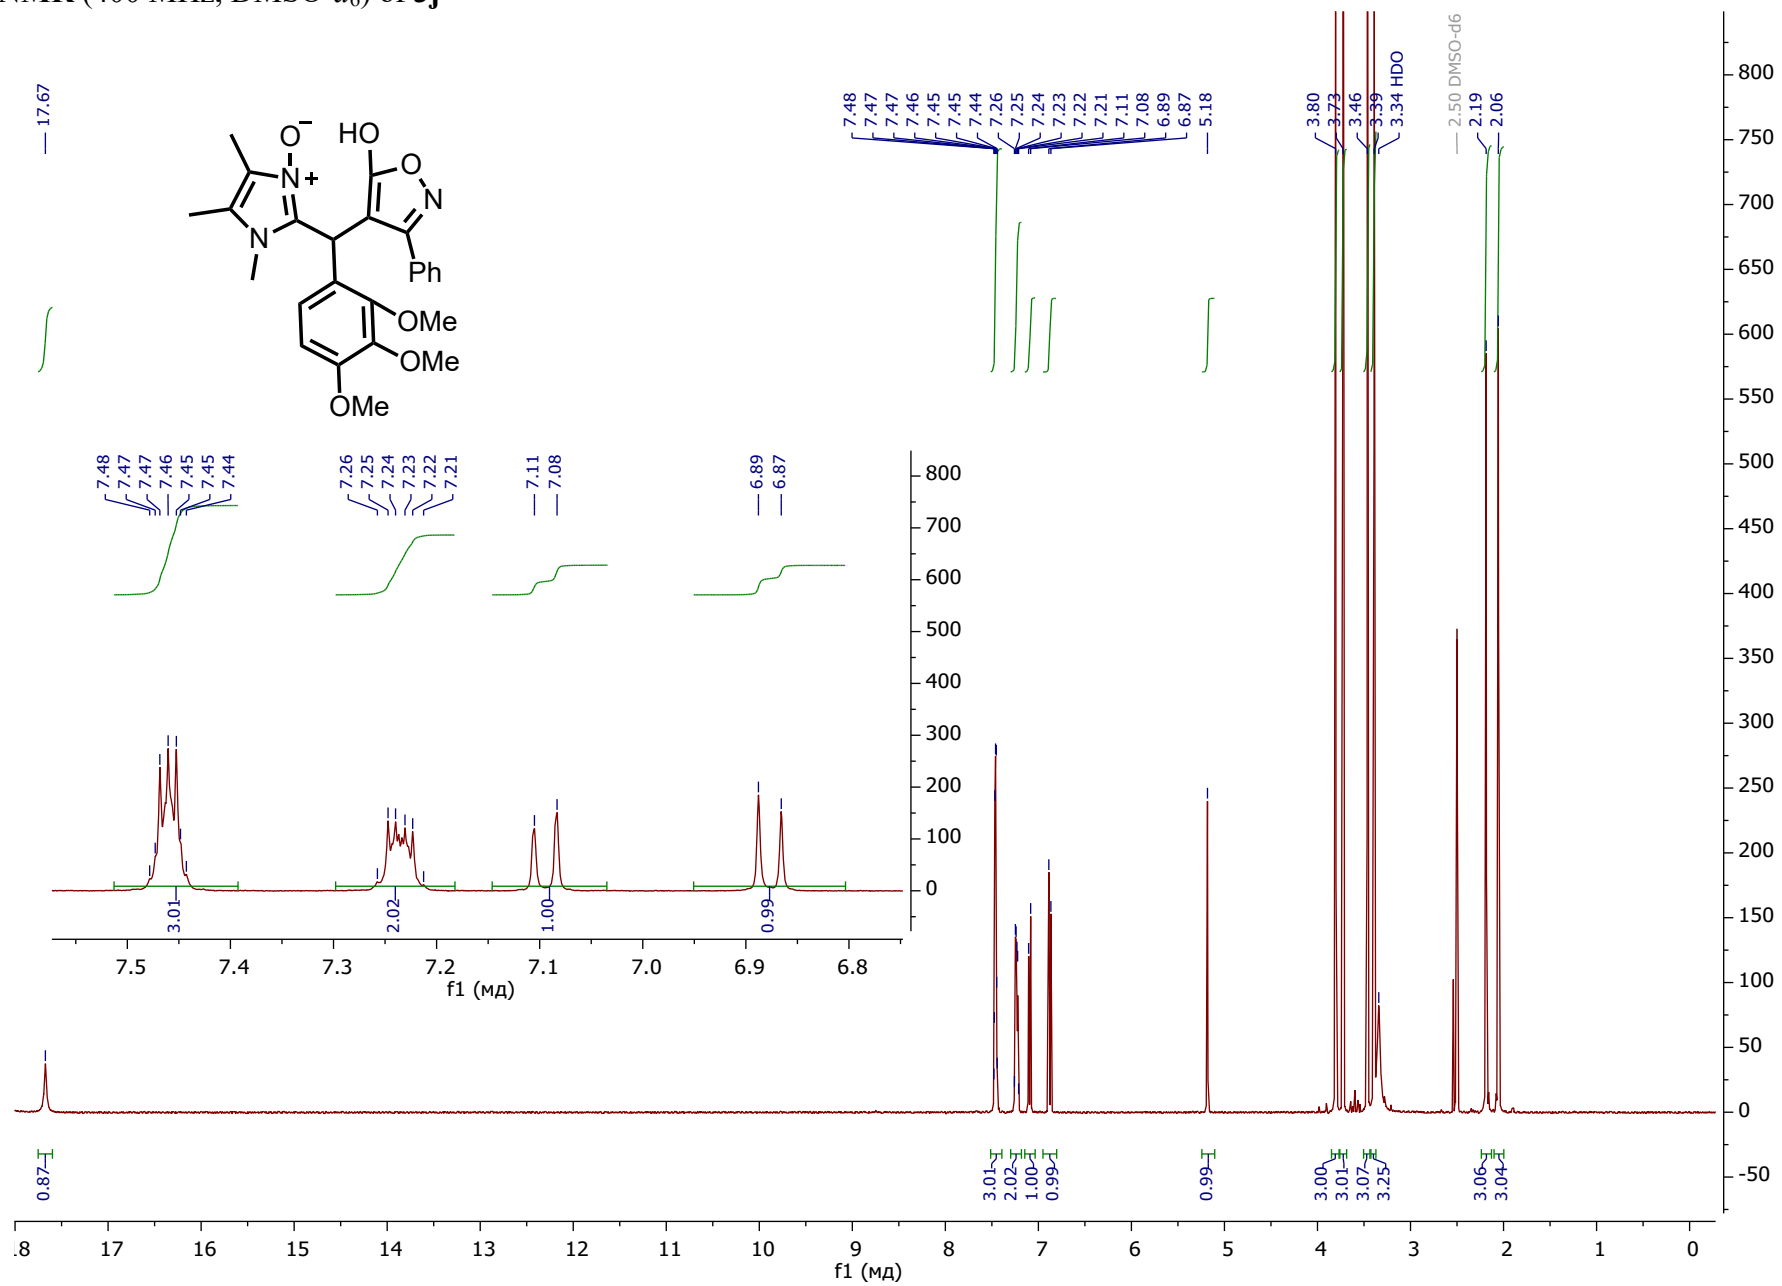

$^{13}\text{C}\{^1\text{H}\}$  NMR (101 MHz, DMSO- $d_6$ ) of **3j**

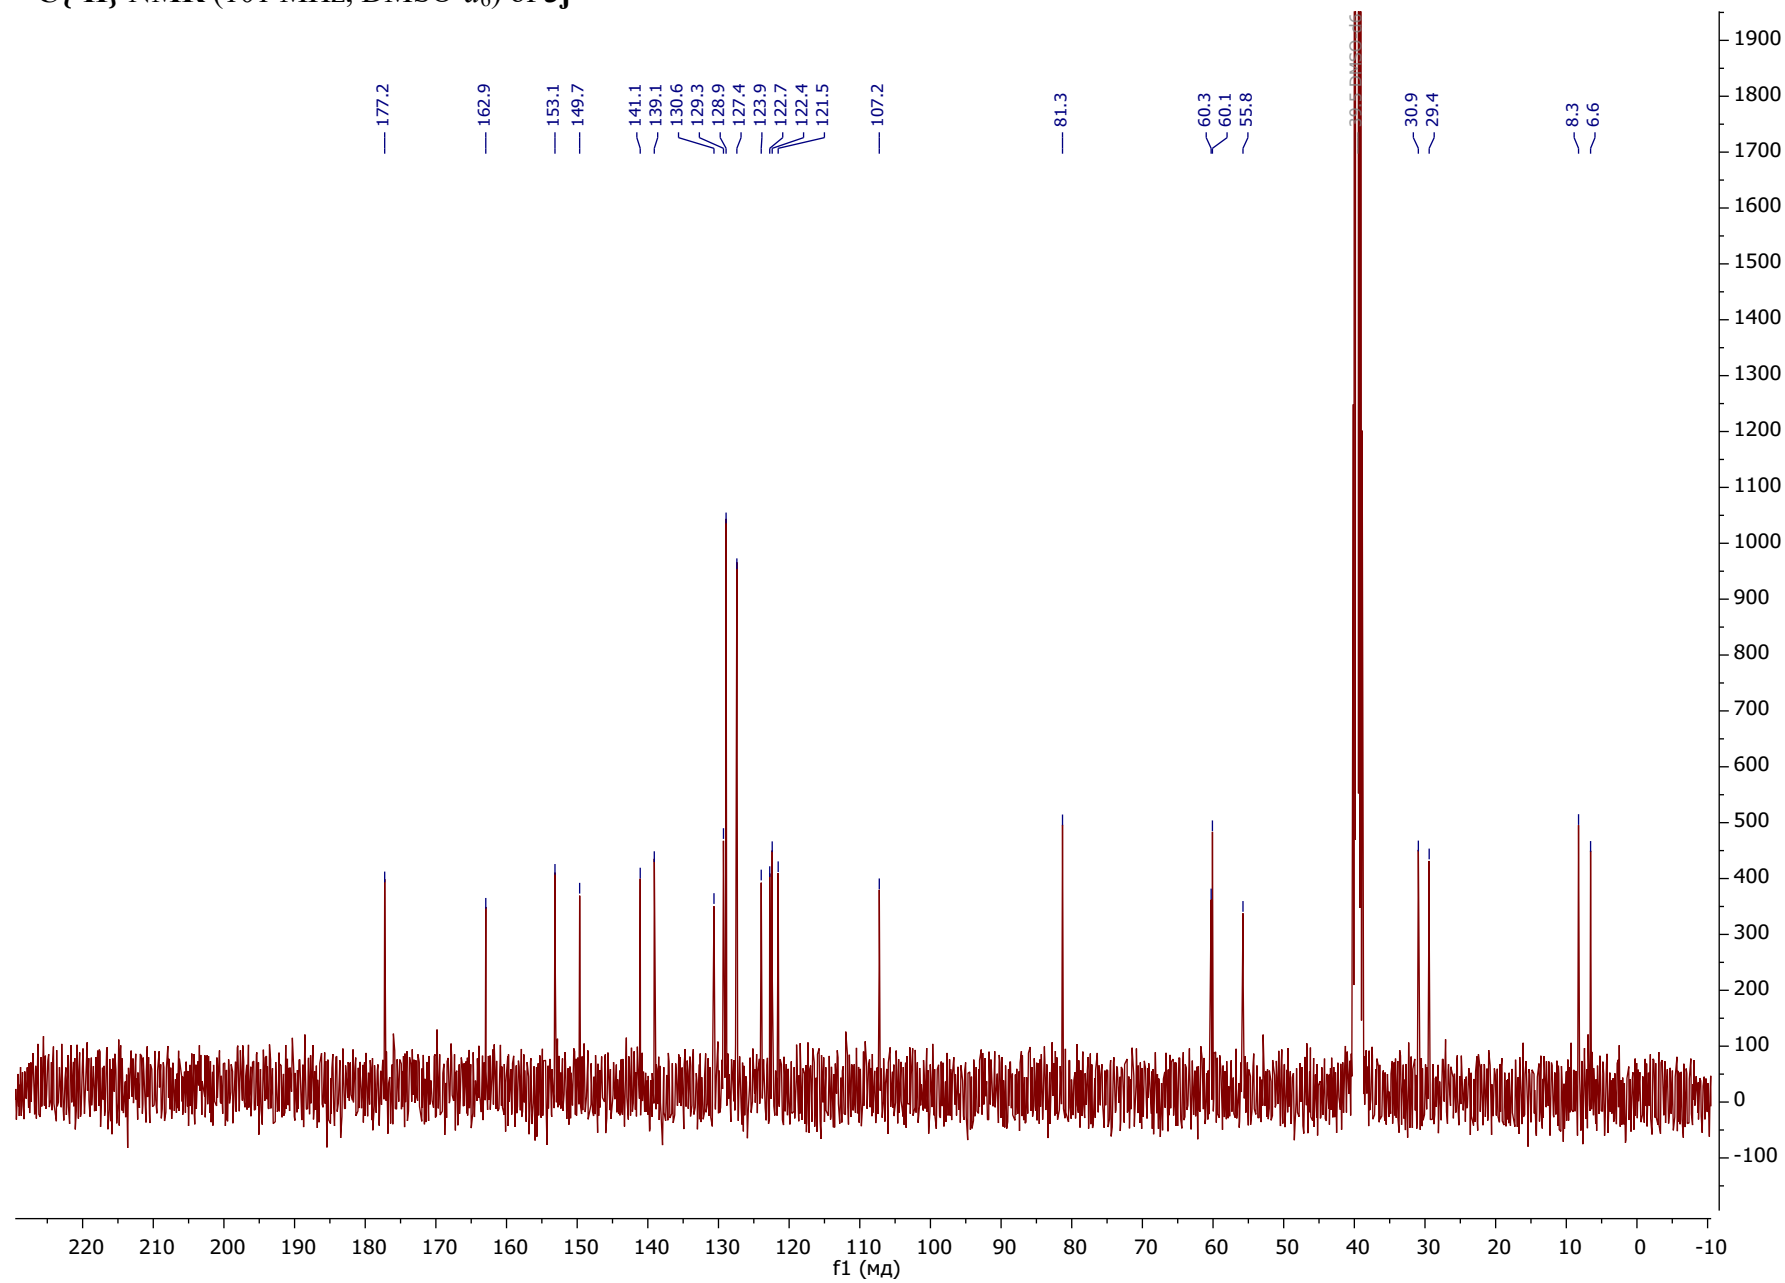

<sup>1</sup>H NMR (600 MHz, DMSO-d<sub>6</sub>) of **3k**

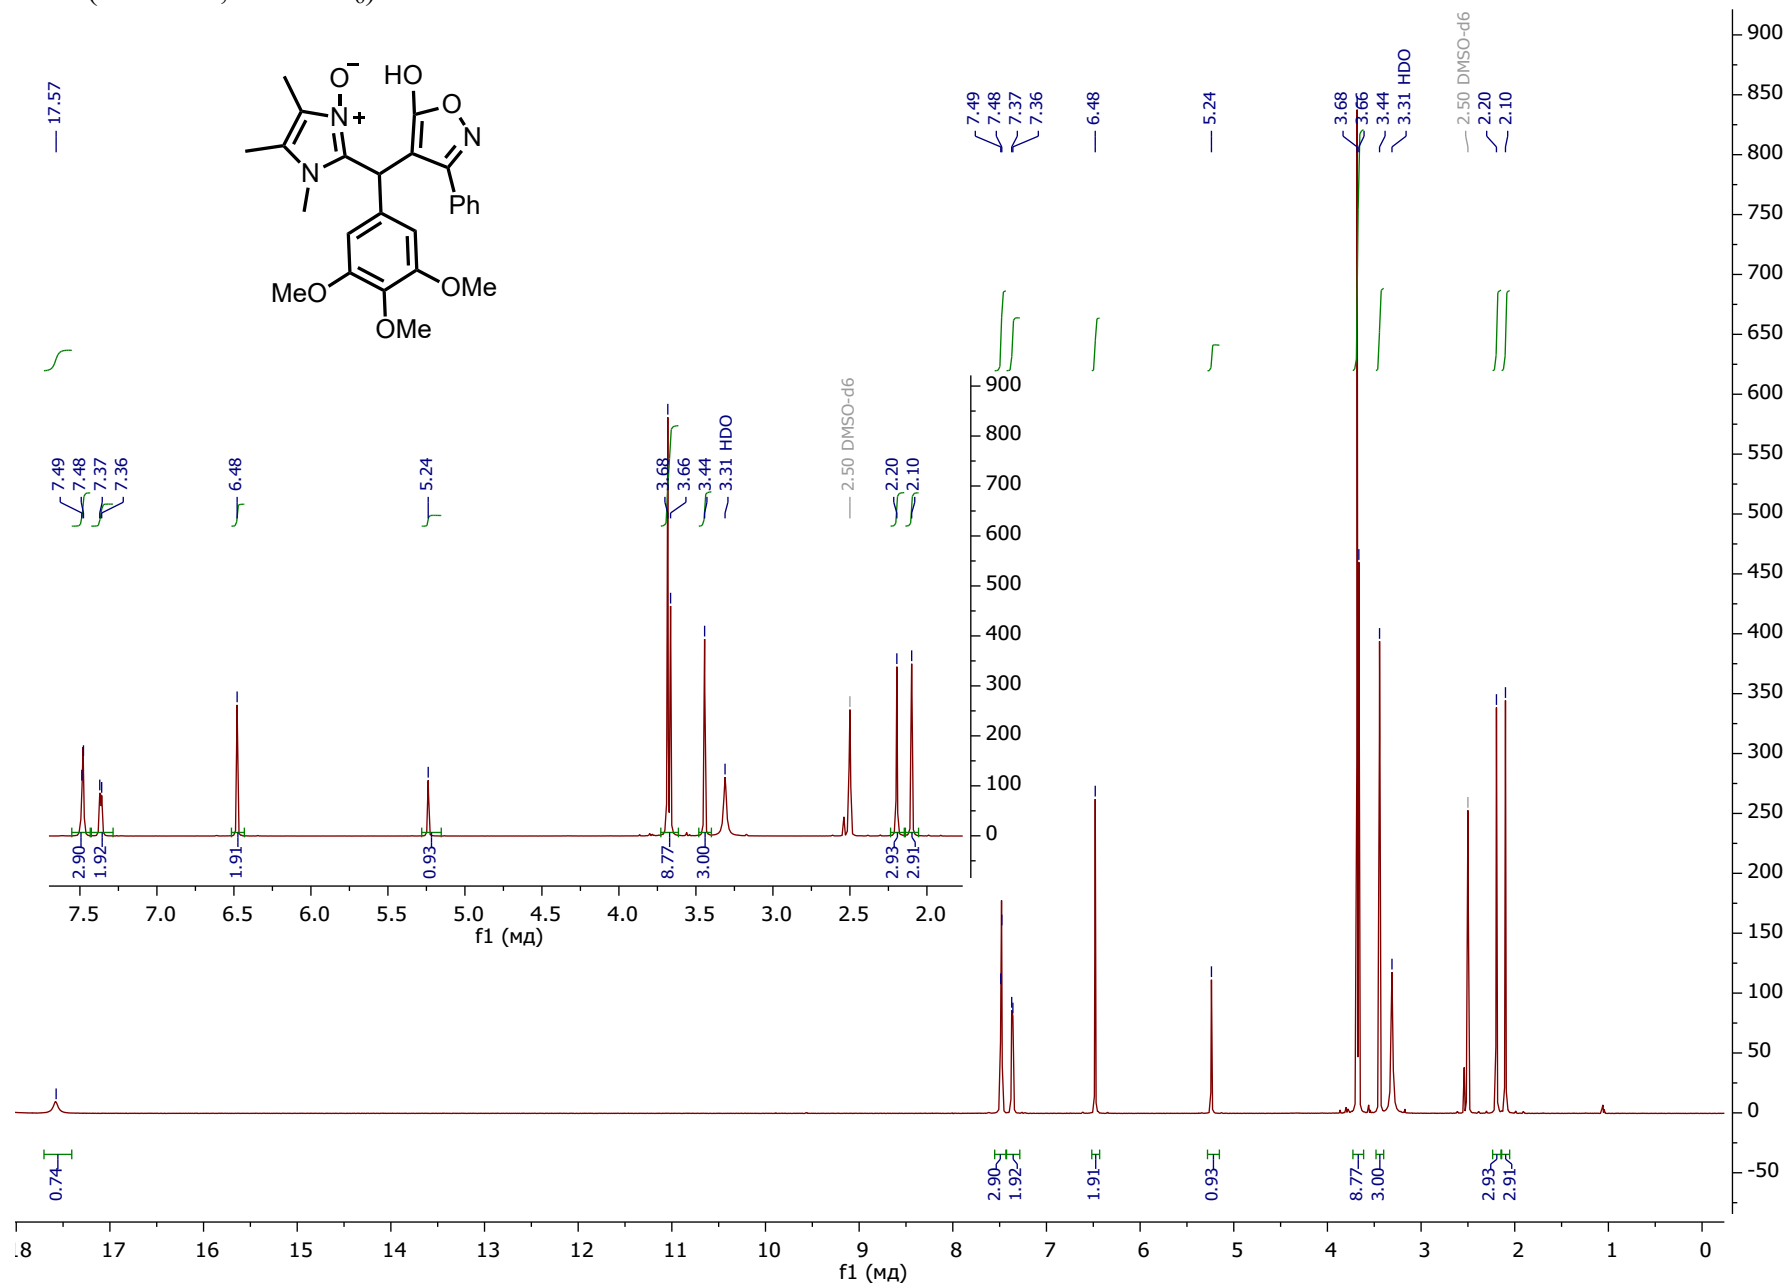

$^{13}\text{C}\{^1\text{H}\}$  NMR (151 MHz, DMSO- $d_6$ ) of **3k**

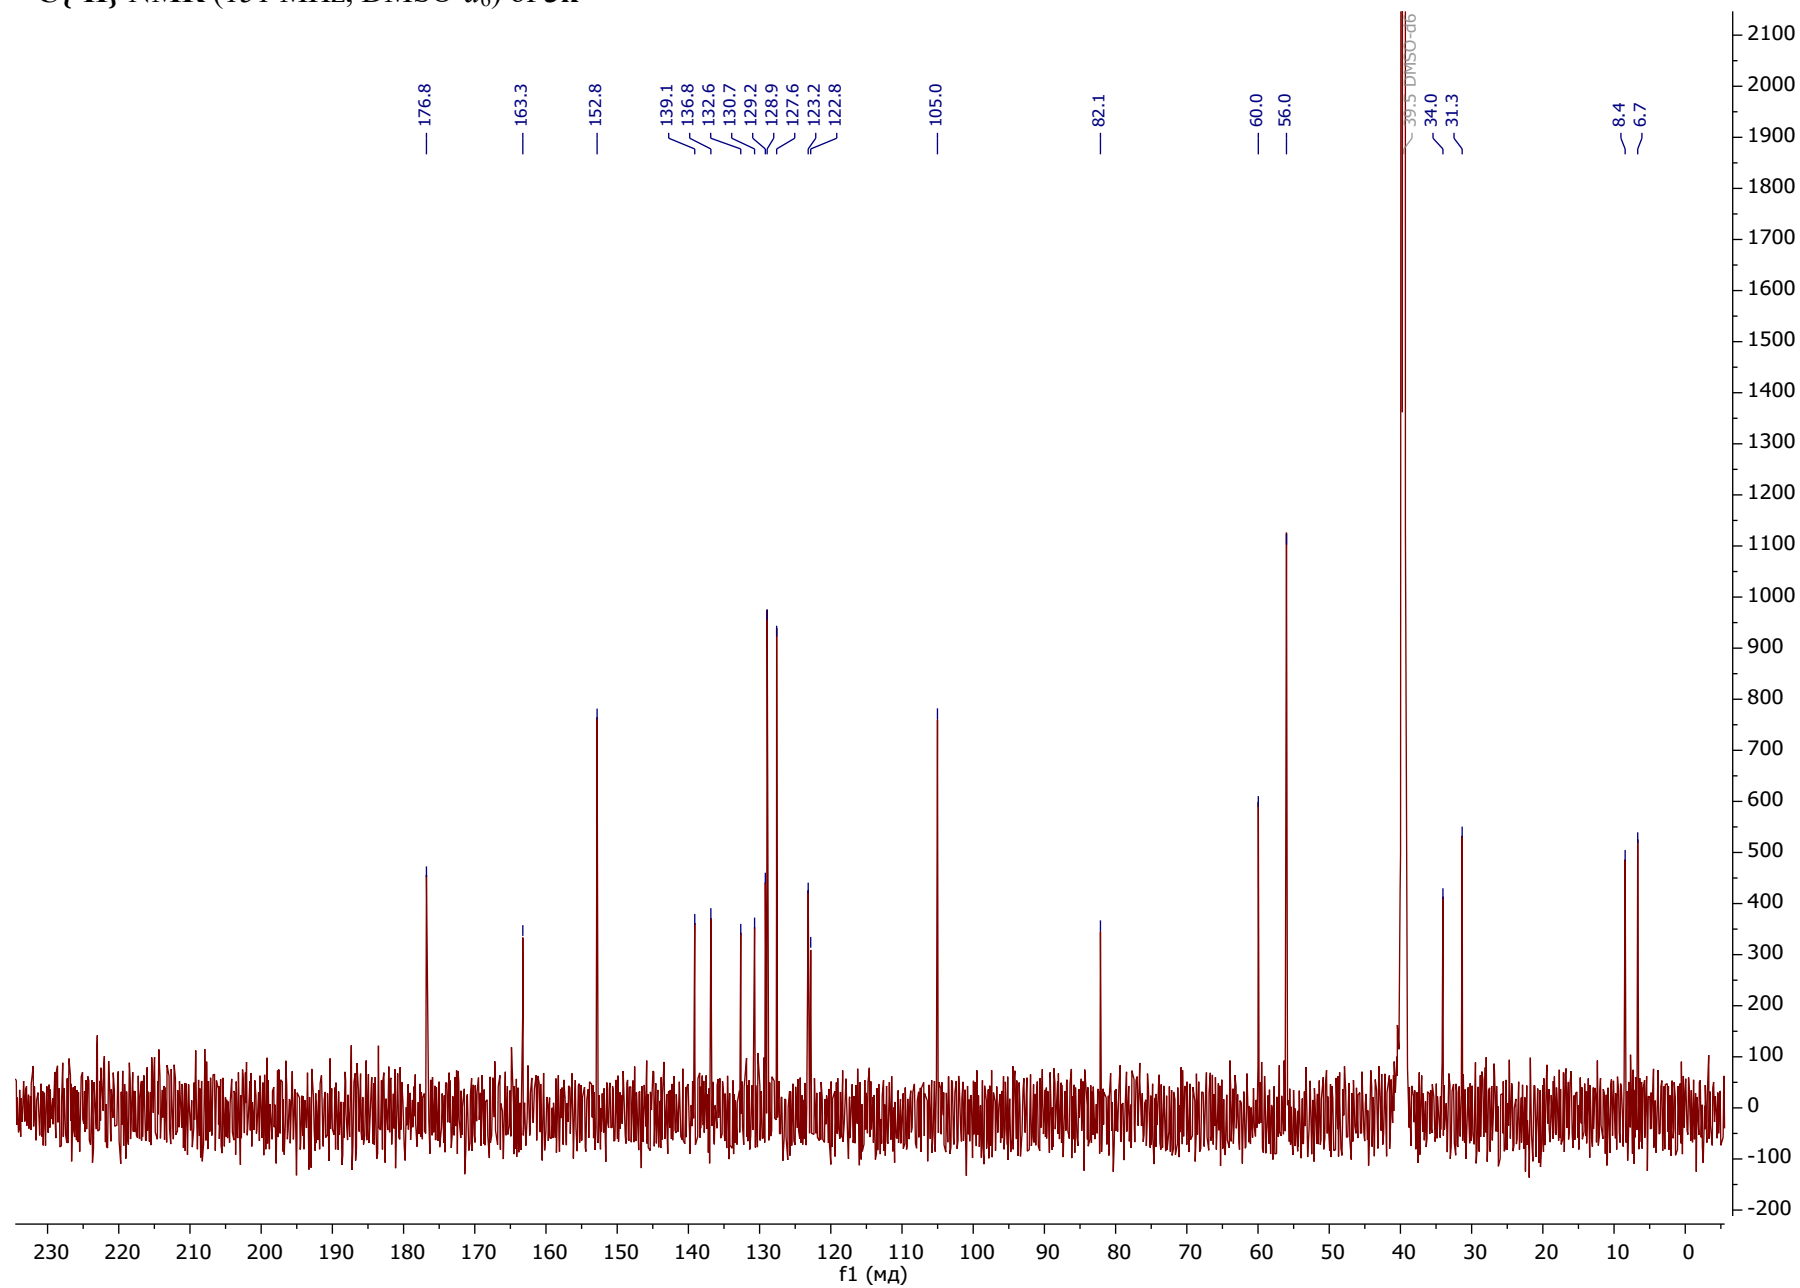



<sup>1</sup>H NMR (600 MHz, DMSO-d<sub>6</sub>) of **31**

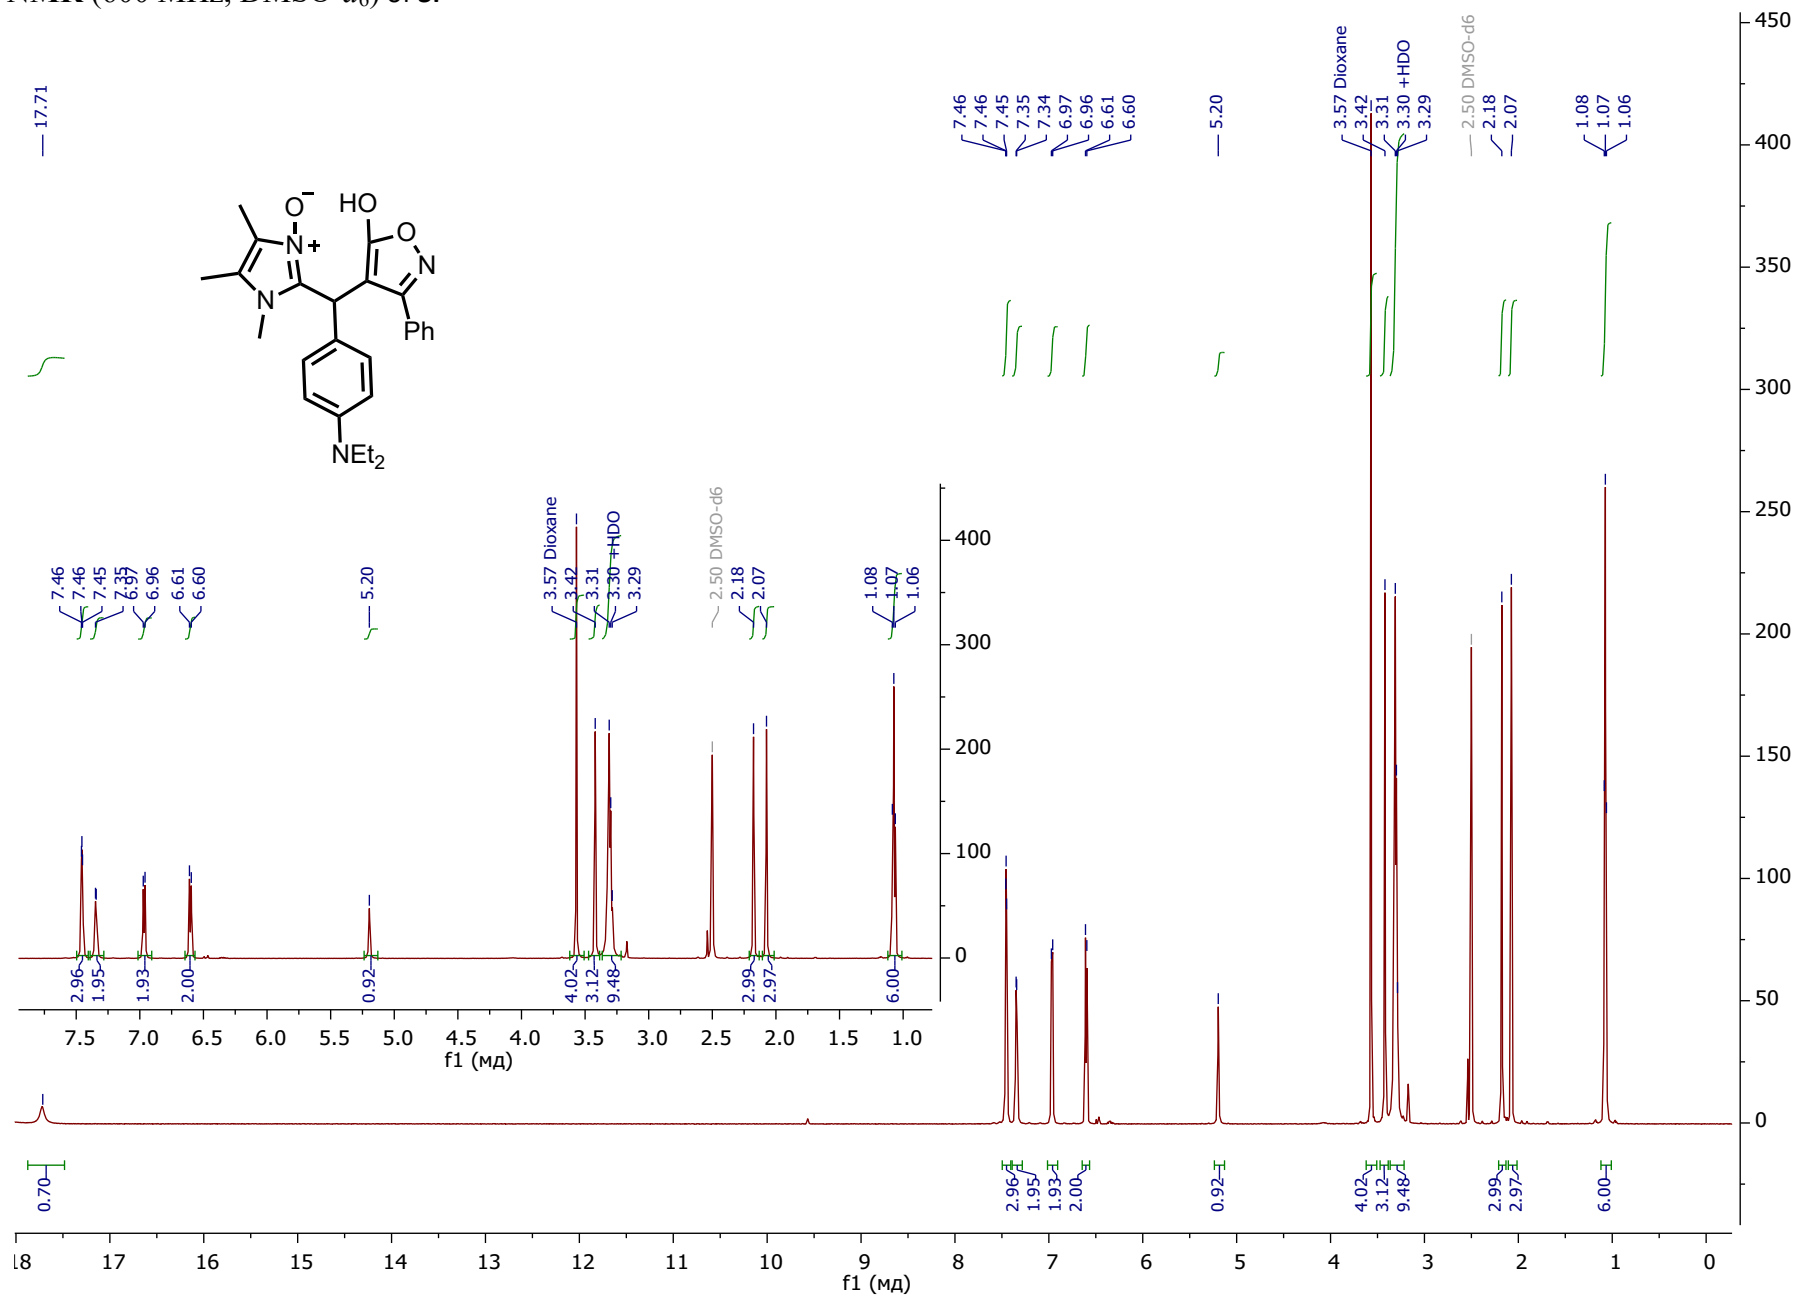

$^{13}\text{C}\{^1\text{H}\}$  NMR (151 MHz, DMSO- $d_6$ ) of **31**

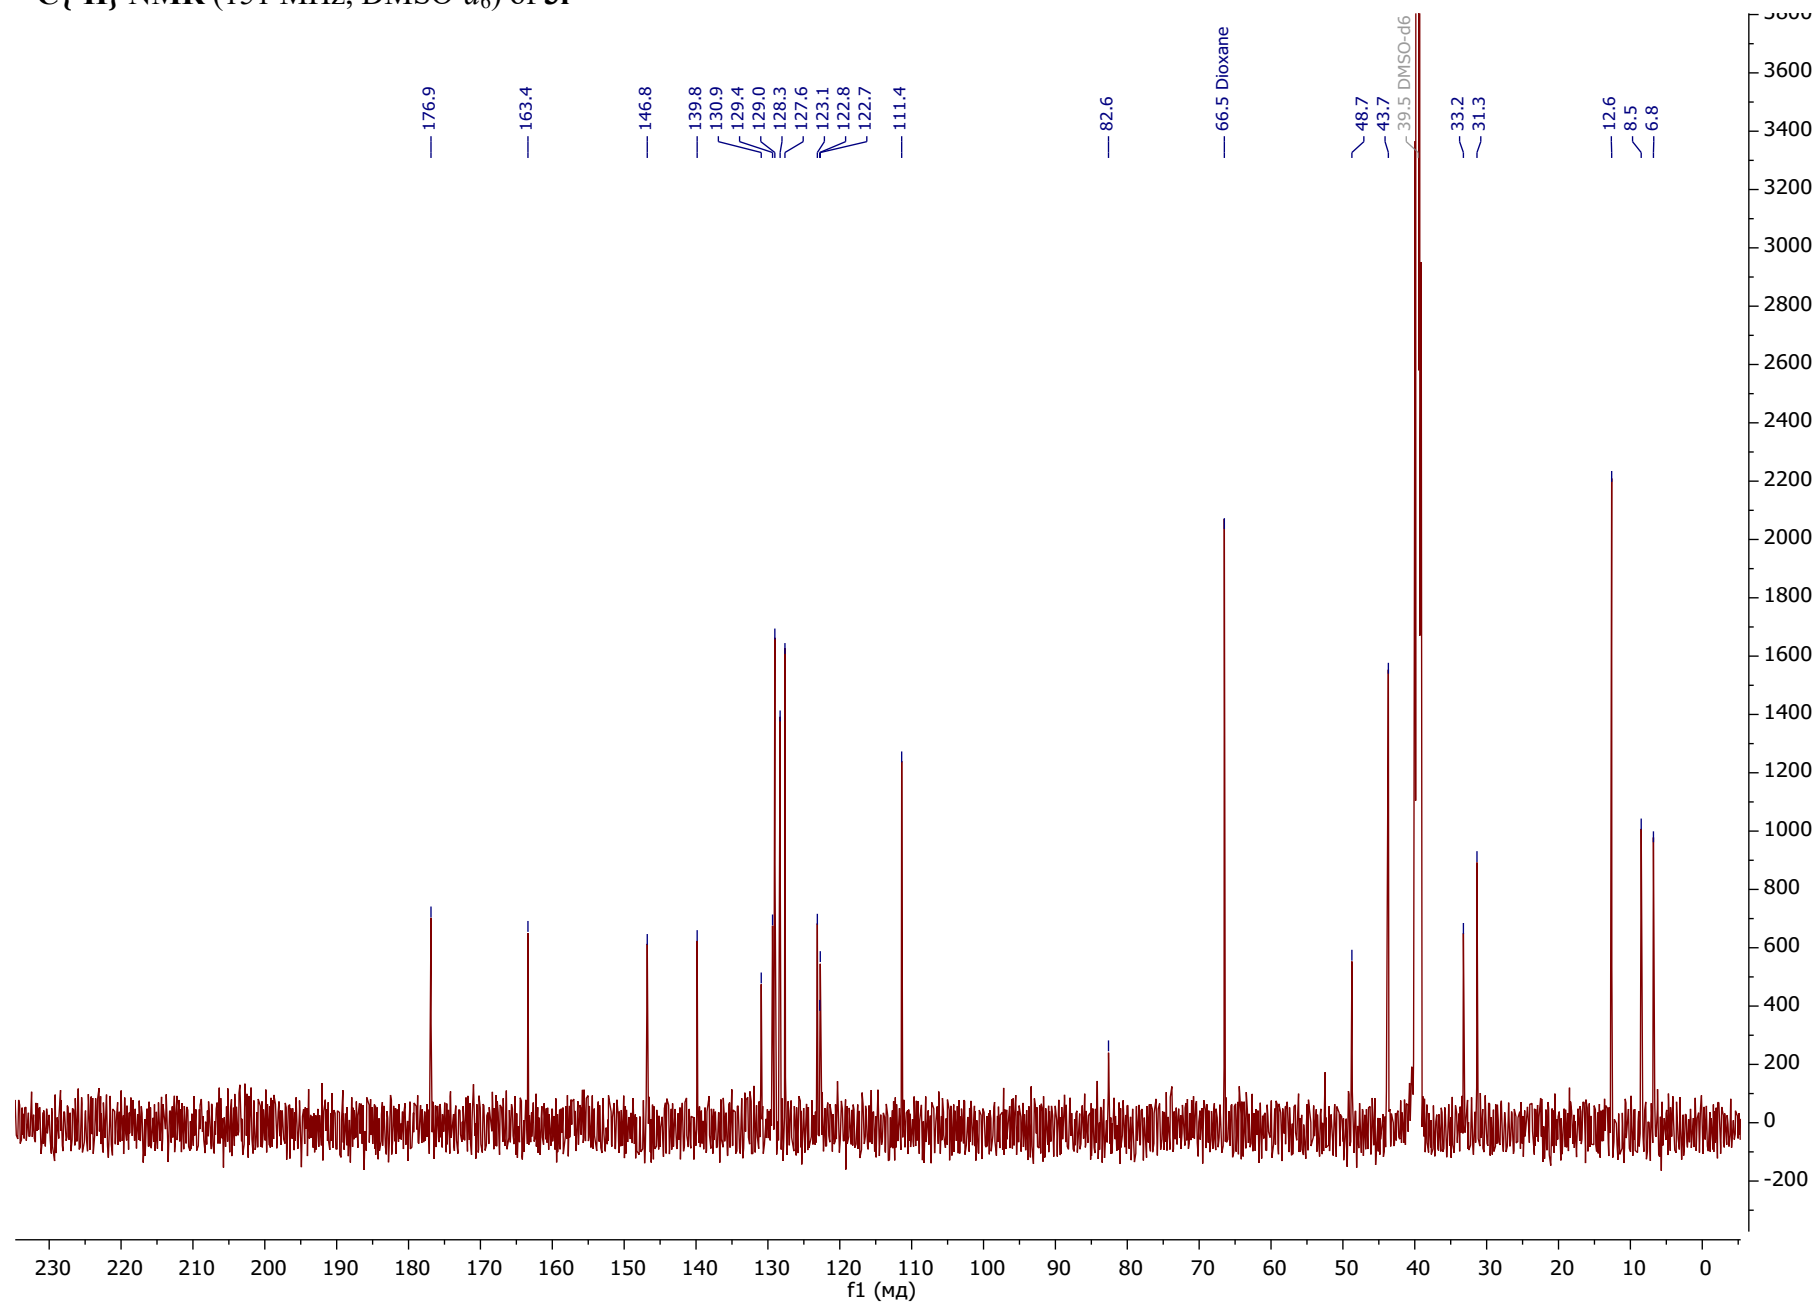

<sup>1</sup>H NMR (300 MHz, DMSO-d<sub>6</sub>) of **3m**

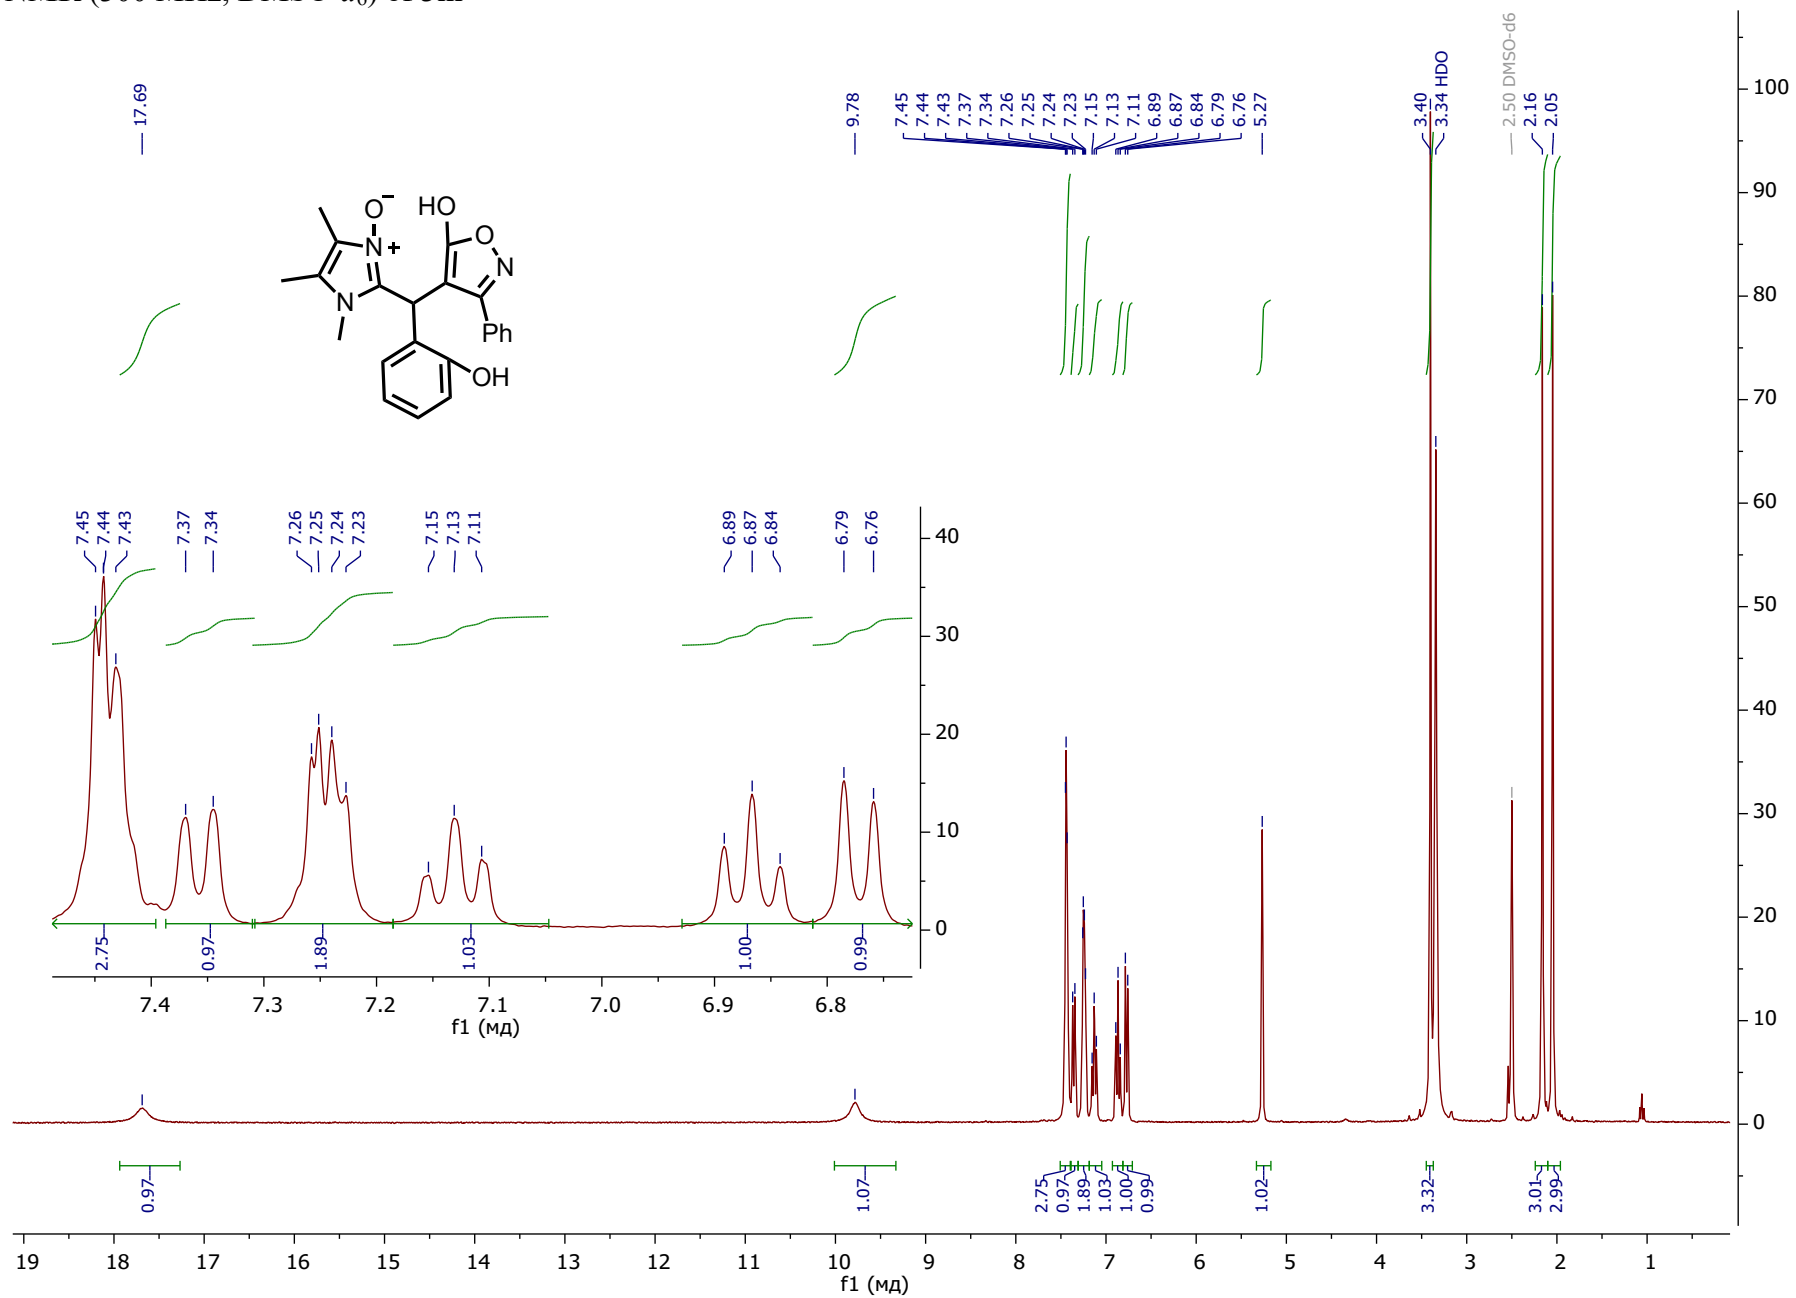

$^{13}\text{C}\{^1\text{H}\}$  NMR (151 MHz, DMSO- $d_6$ ) of **3m**

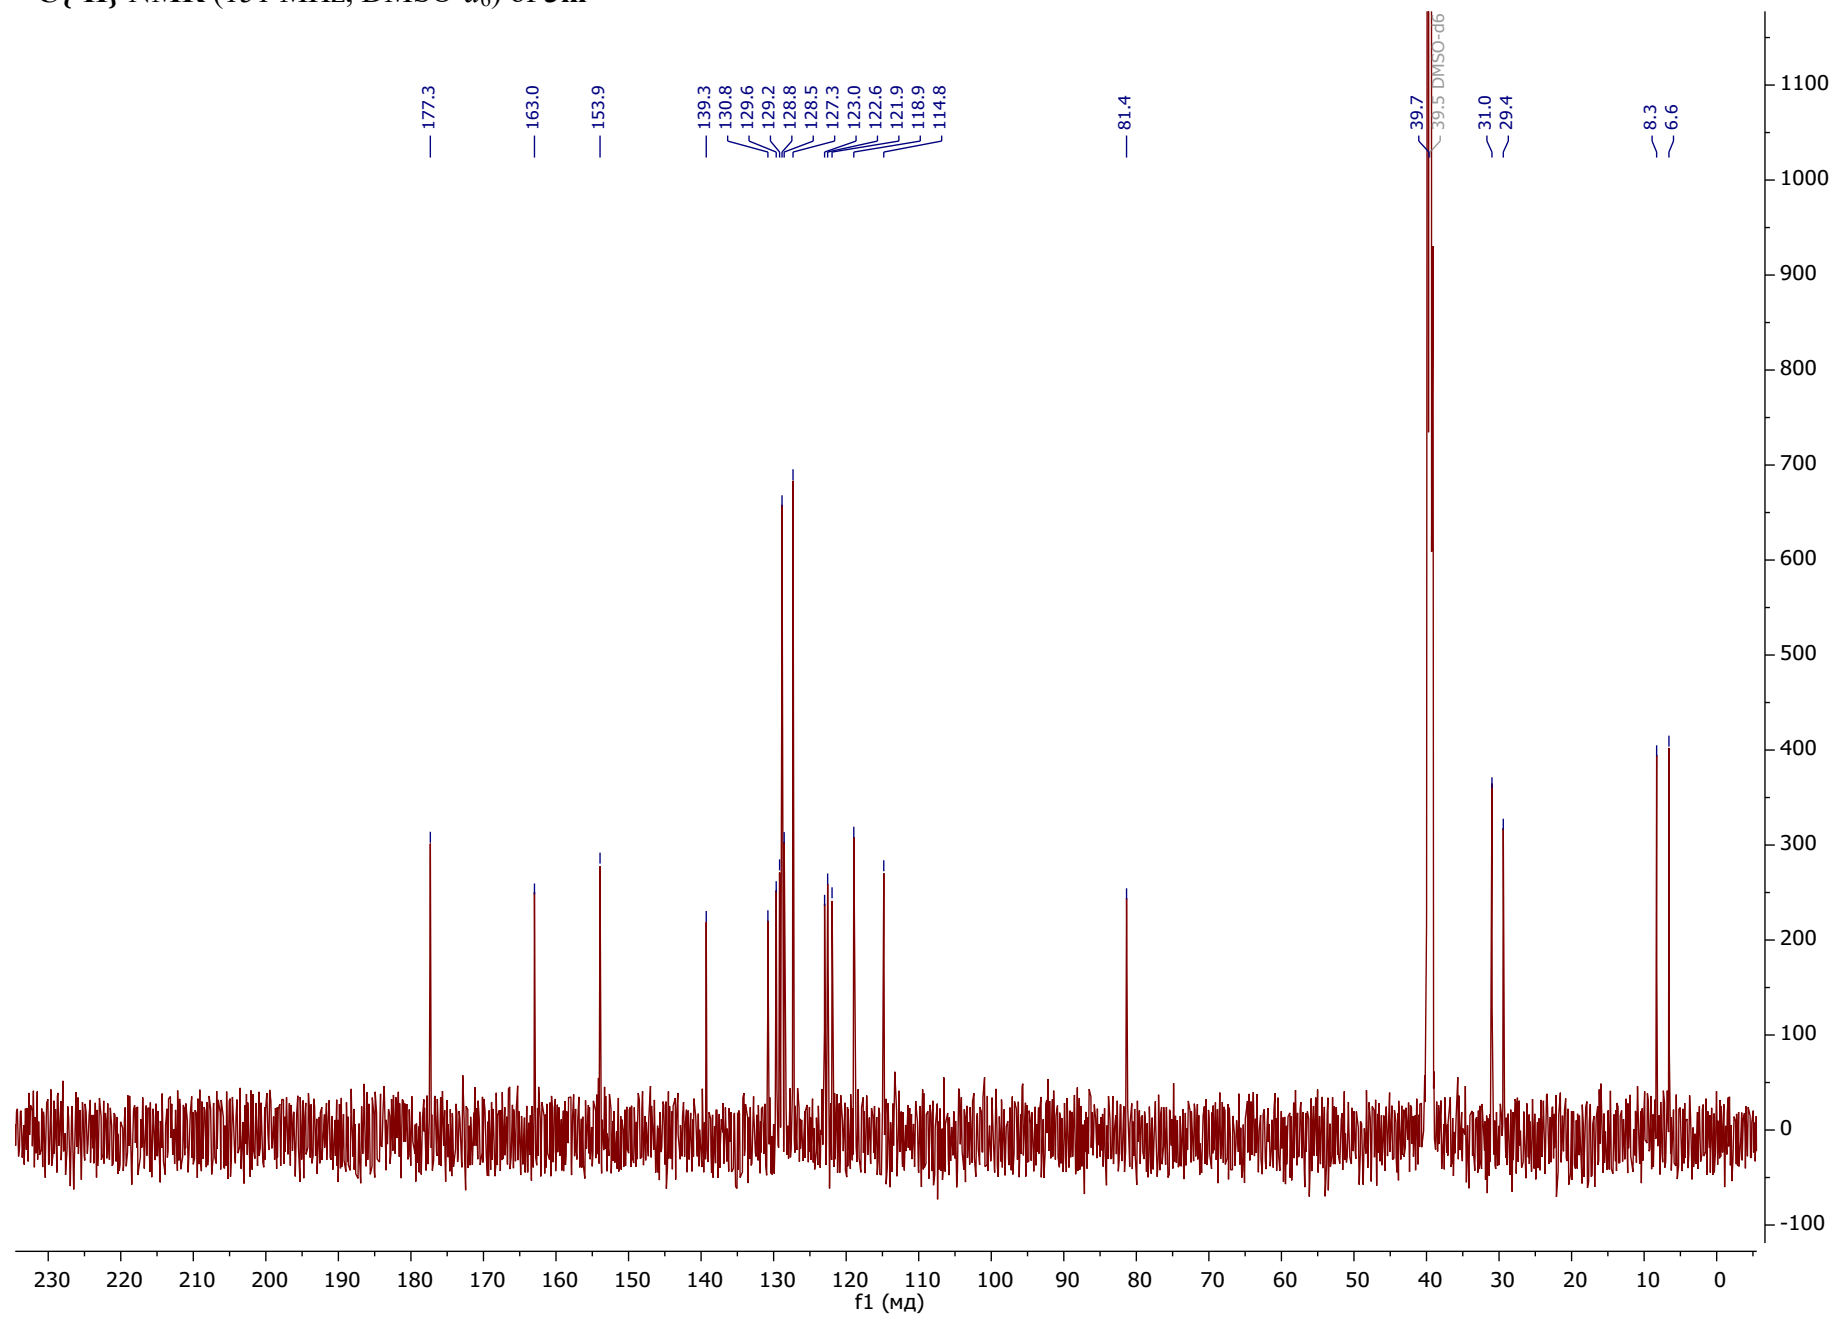

<sup>1</sup>H NMR (400 MHz, DMSO-d<sub>6</sub>) of **3n**

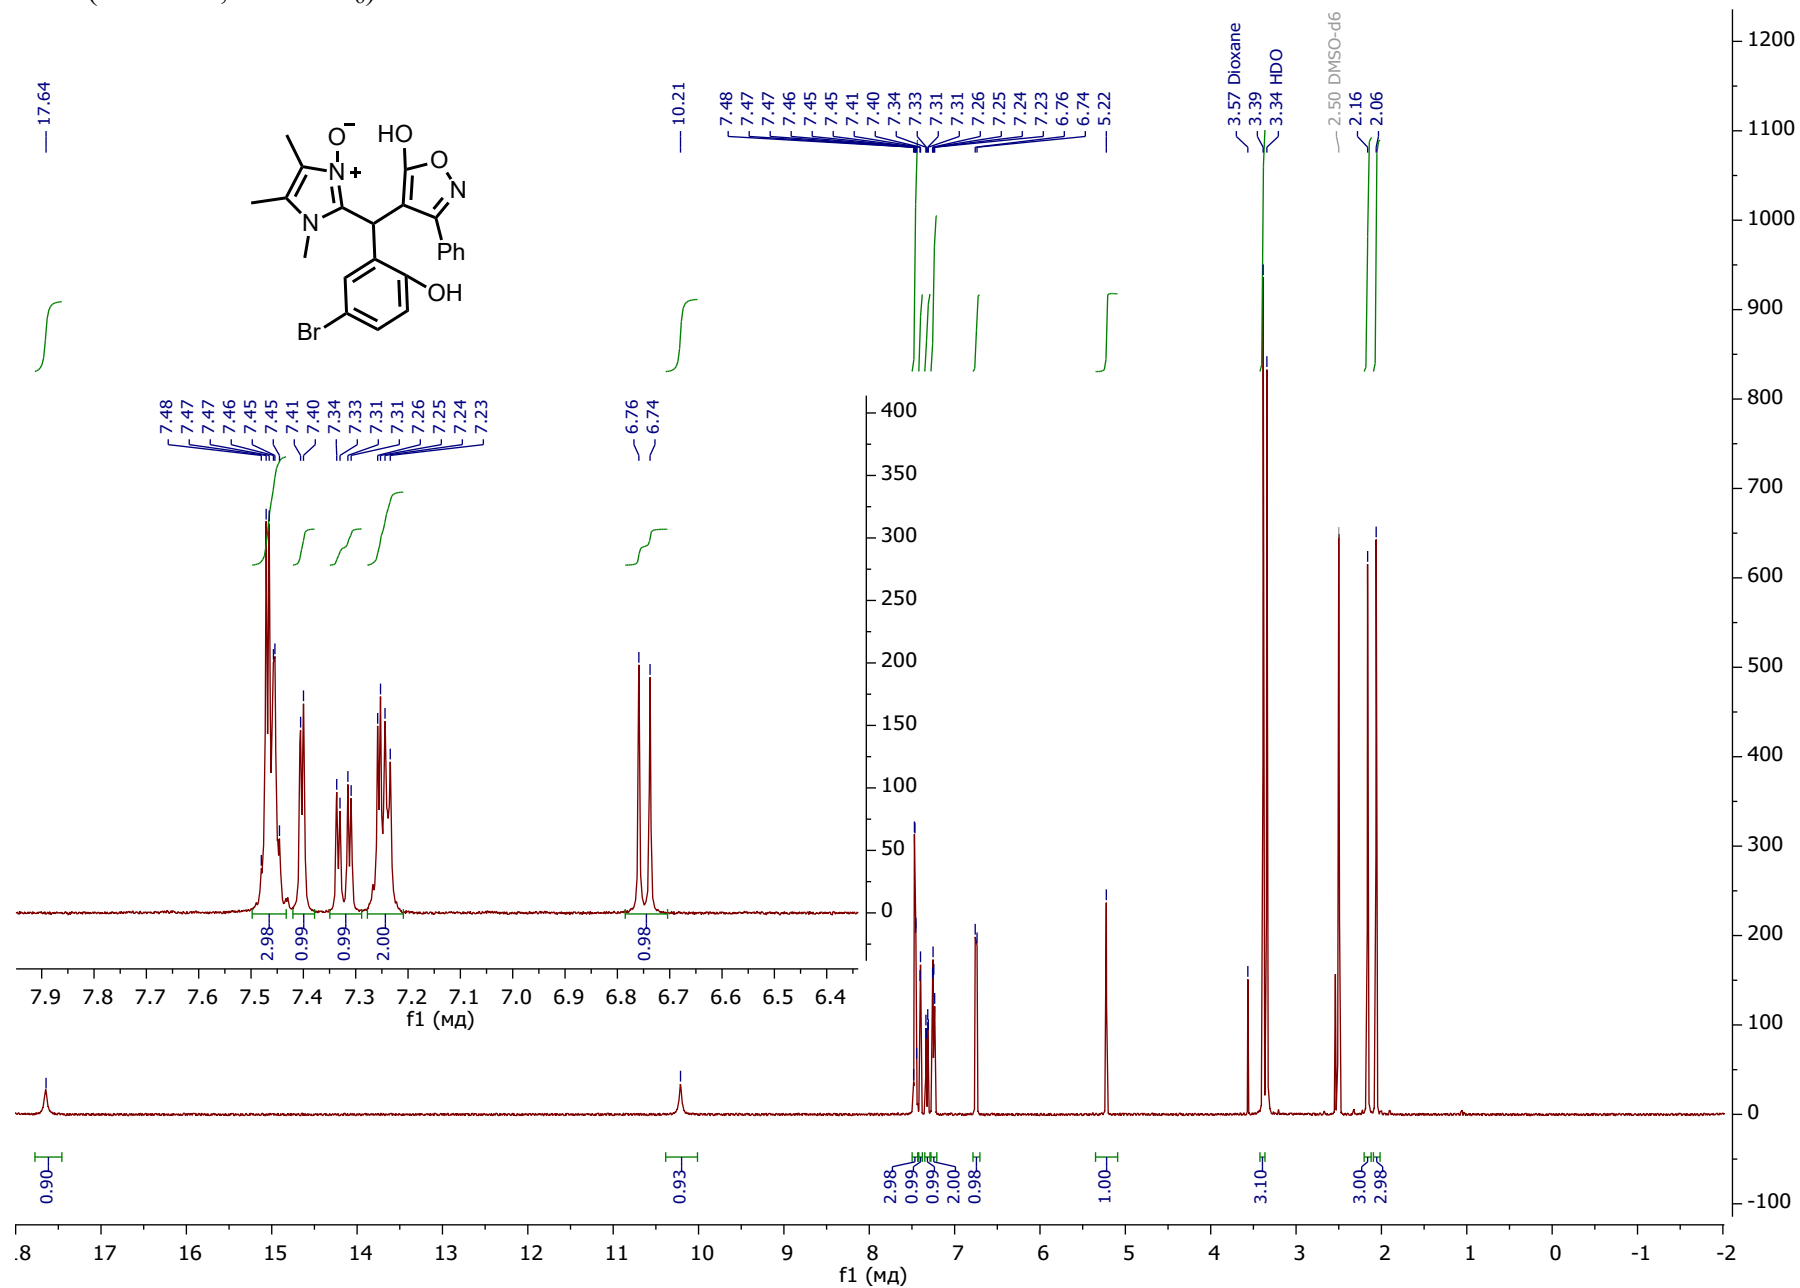

$^{13}\text{C}\{^1\text{H}\}$  NMR (151 MHz, DMSO- $d_6$ ) of **3n**

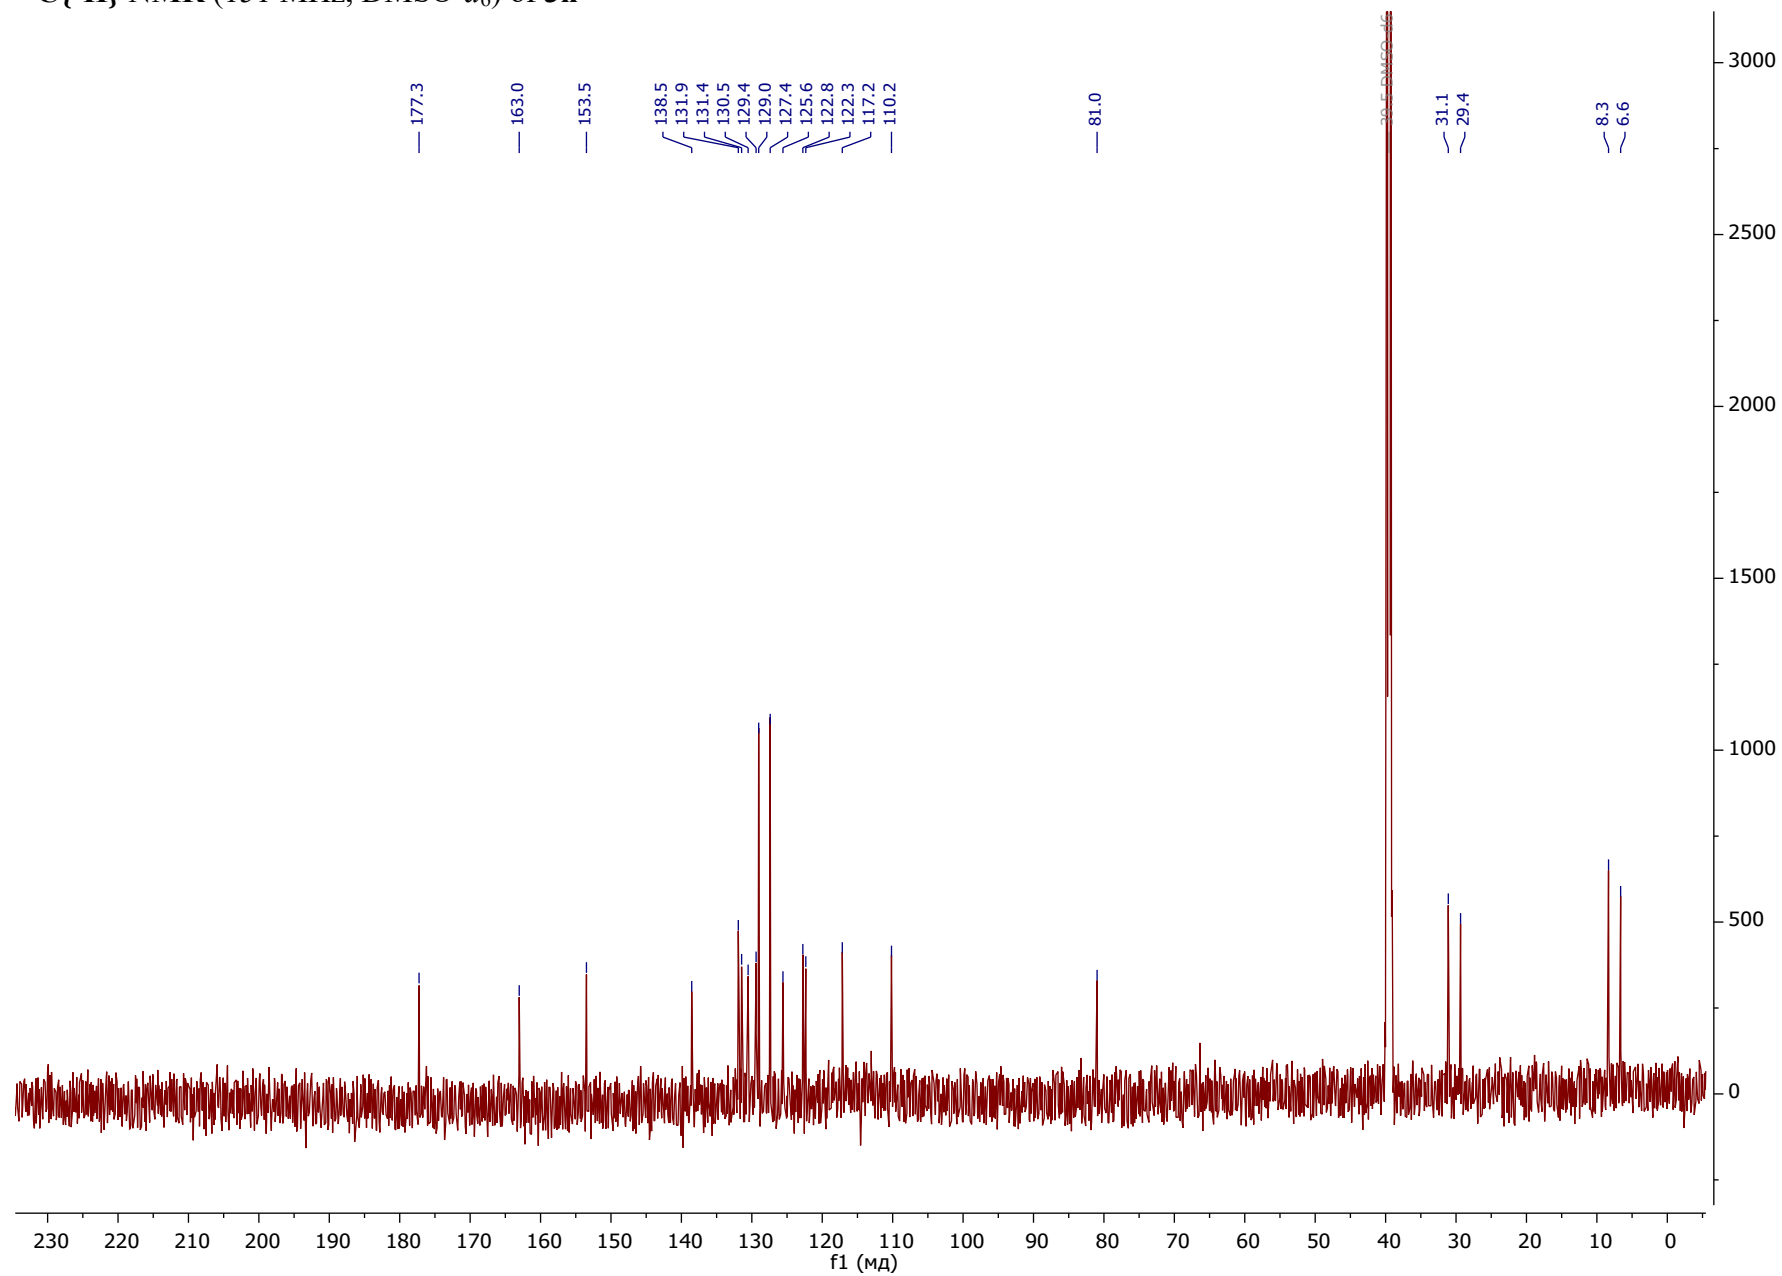

<sup>1</sup>H NMR (400 MHz, DMSO-d<sub>6</sub>) of **3o**

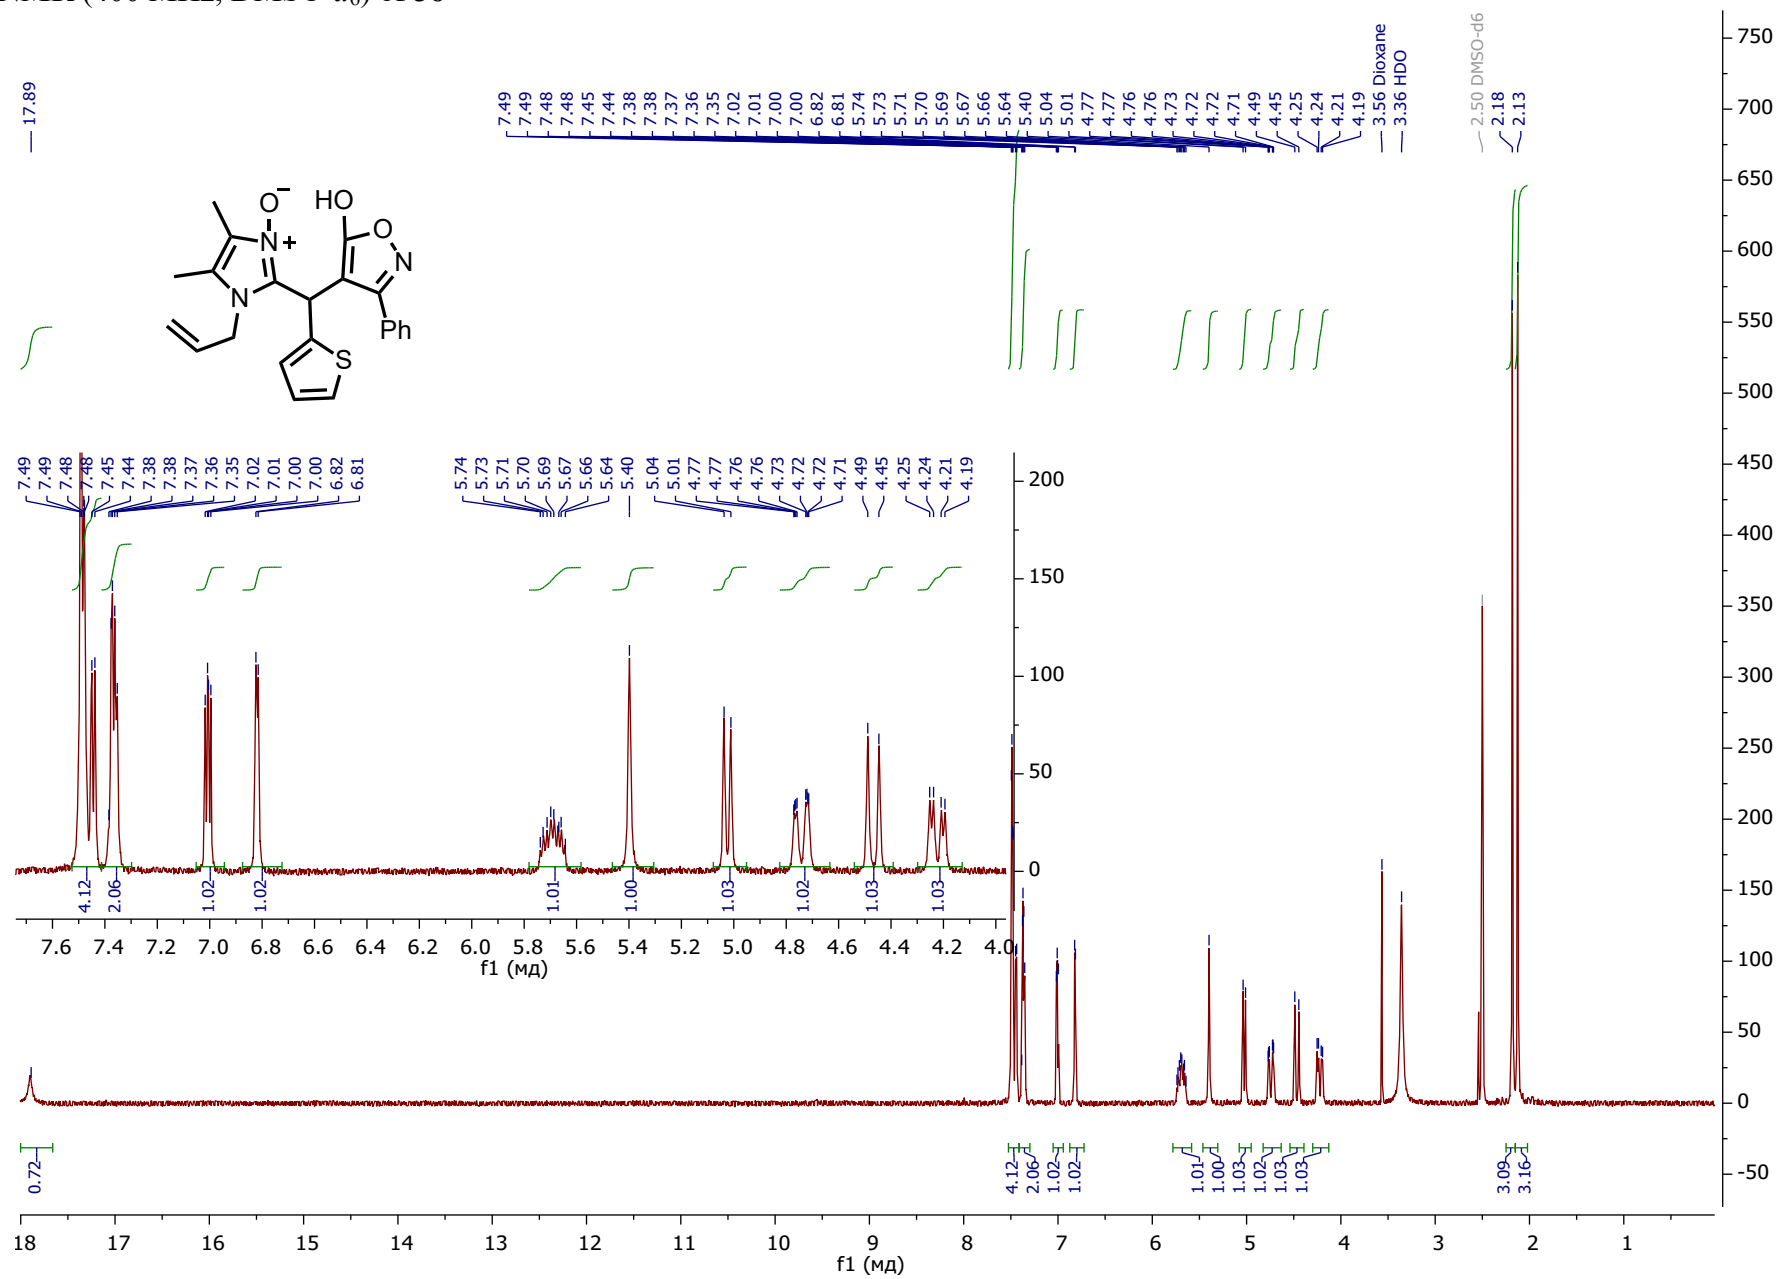

$^{13}\text{C}\{^1\text{H}\}$  NMR (101 MHz,  $\text{DMSO-}d_6$ ) of **3o**

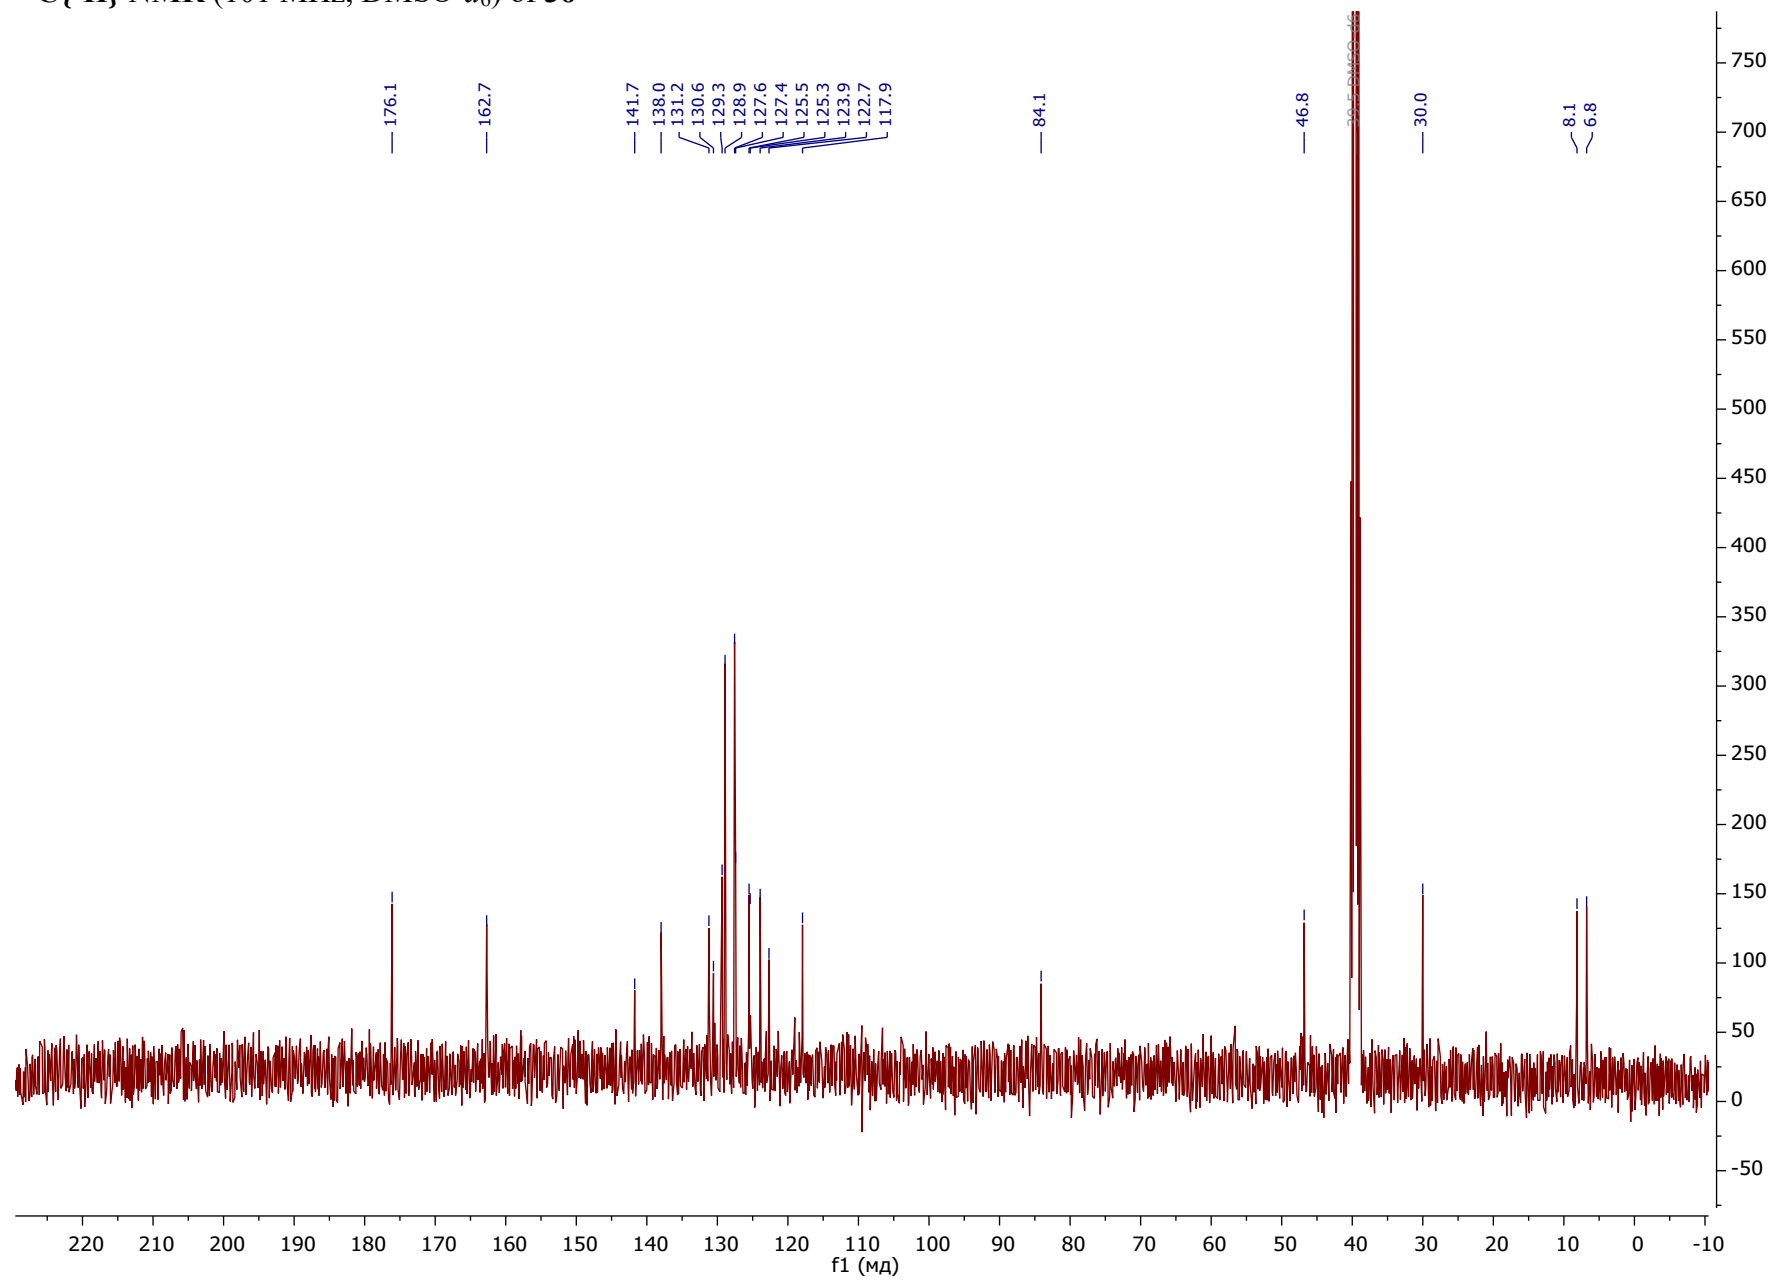



<sup>1</sup>H NMR (600 MHz, DMSO-d<sub>6</sub>) of **3p**

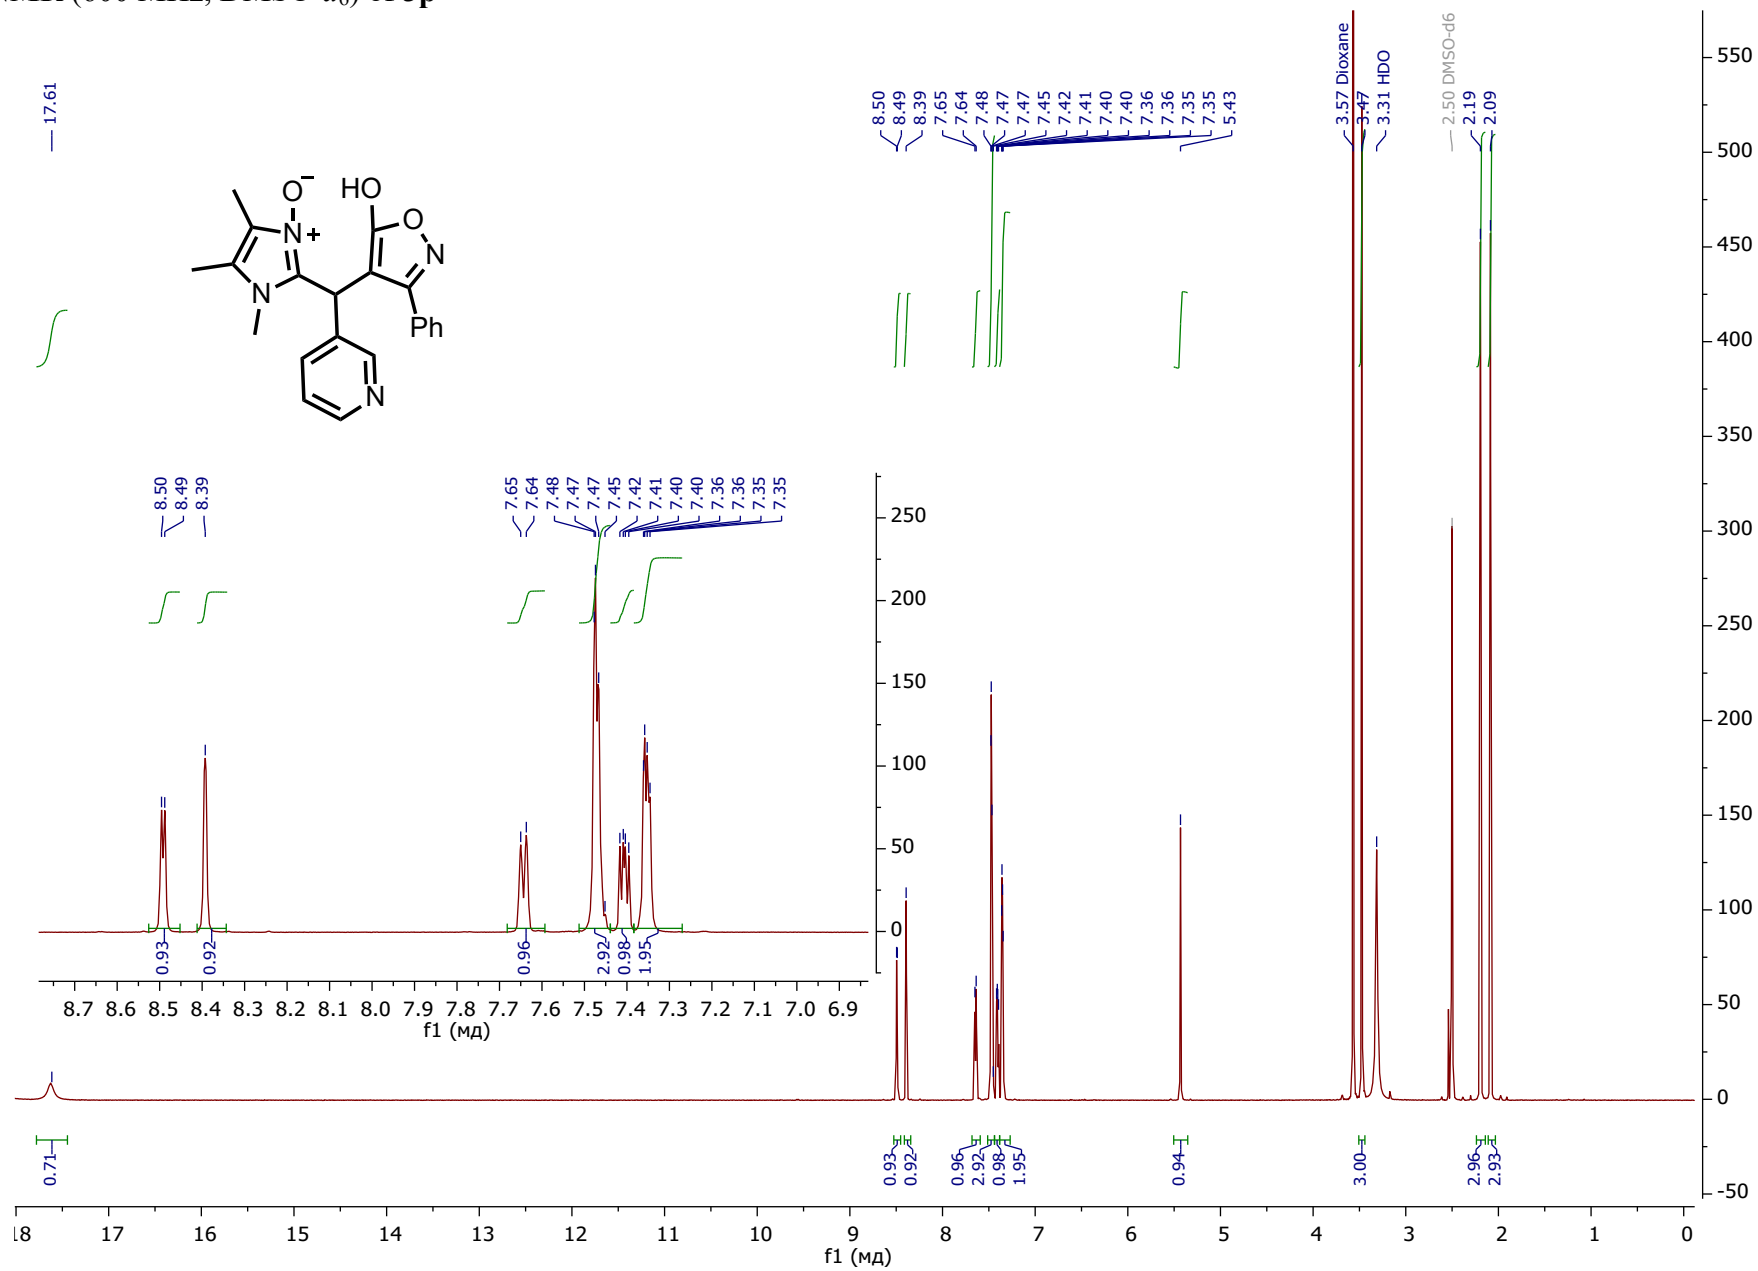

$^{13}\text{C}\{^1\text{H}\}$  NMR (151 MHz,  $\text{DMSO-}d_6$ ) of **3p**

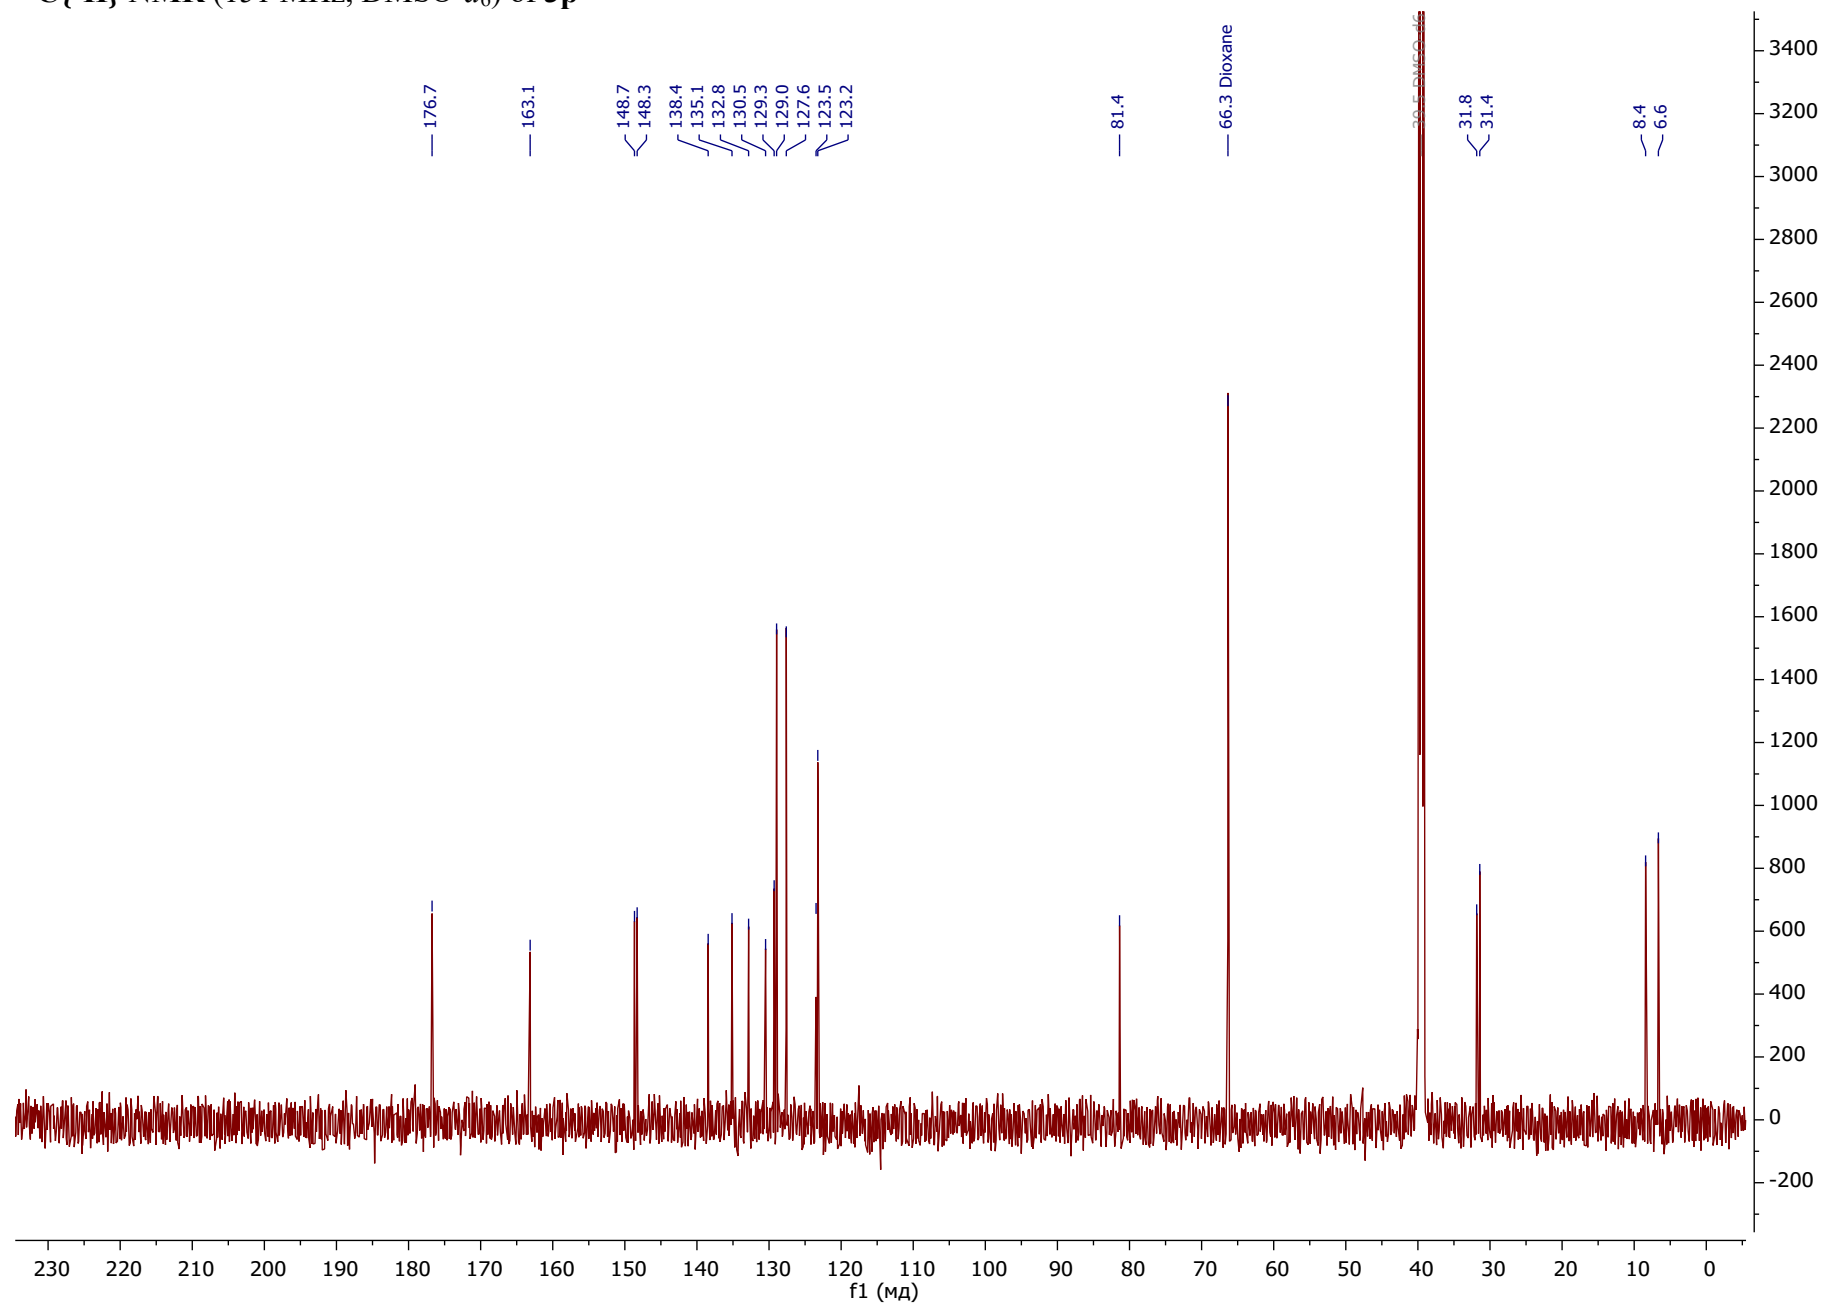

<sup>1</sup>H NMR (300 MHz, DMSO-d<sub>6</sub>) of **3q**

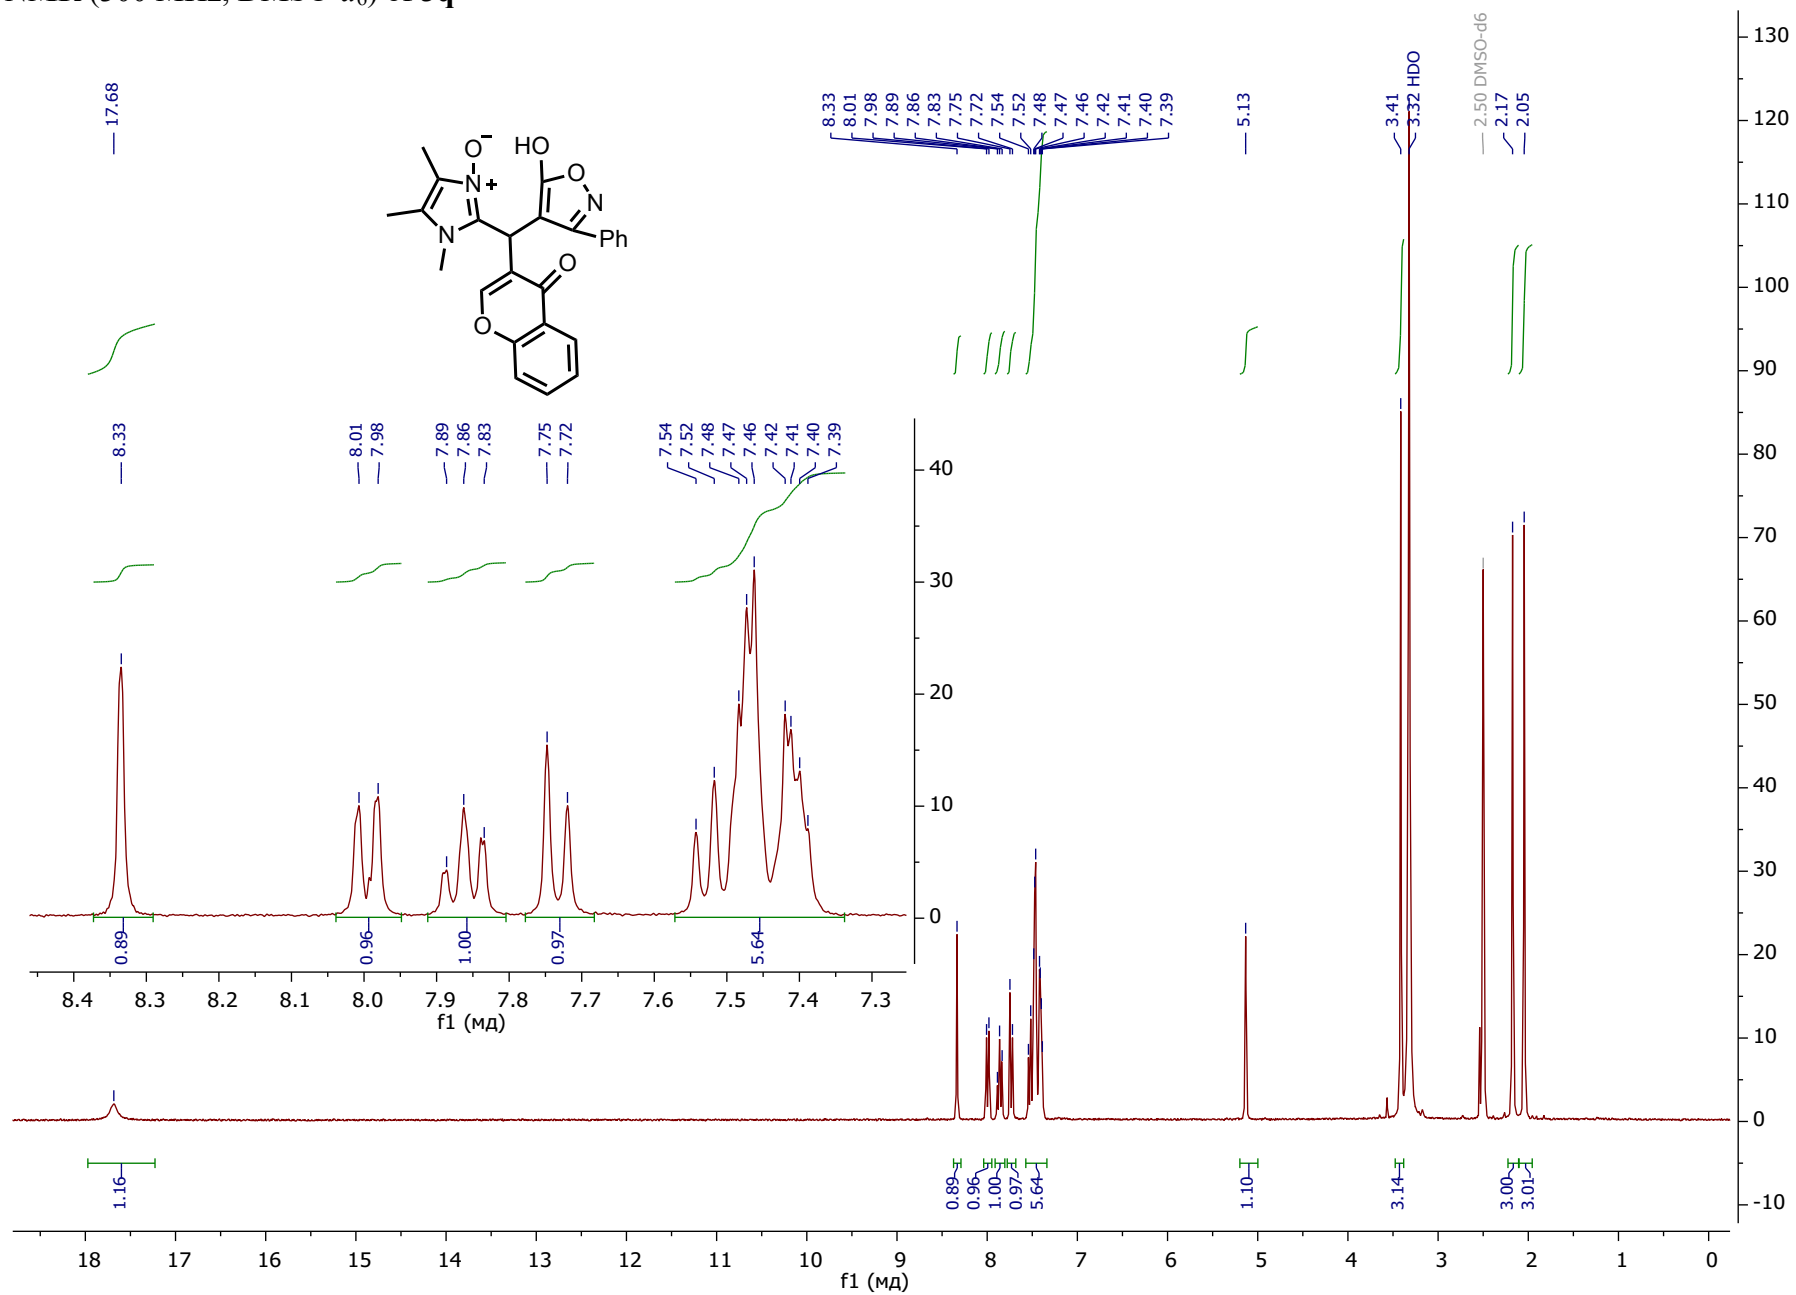

$^{13}\text{C}\{^1\text{H}\}$  NMR (151 MHz,  $\text{DMSO-}d_6$ ) of **3q**

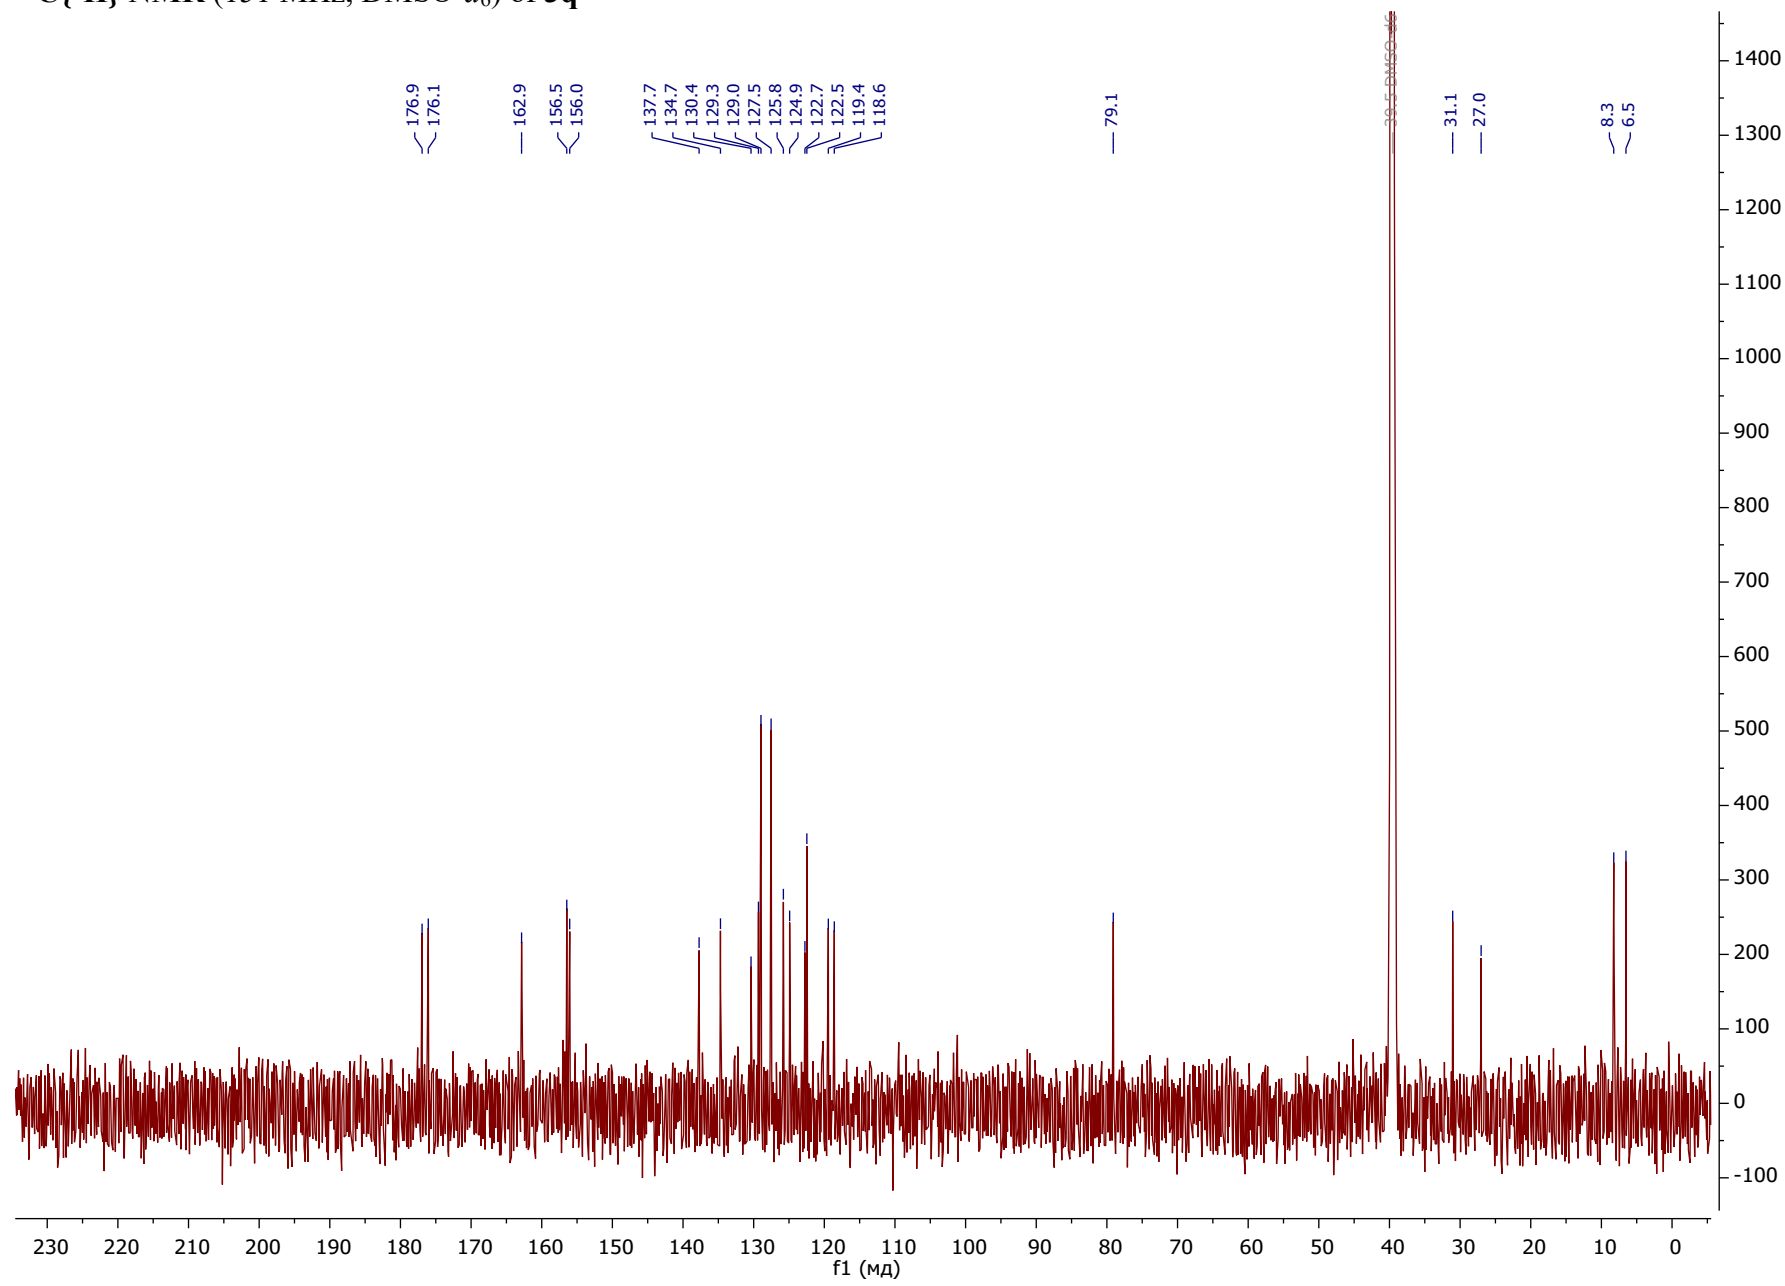

<sup>1</sup>H NMR (300 MHz, DMSO-d<sub>6</sub>) of **3r**

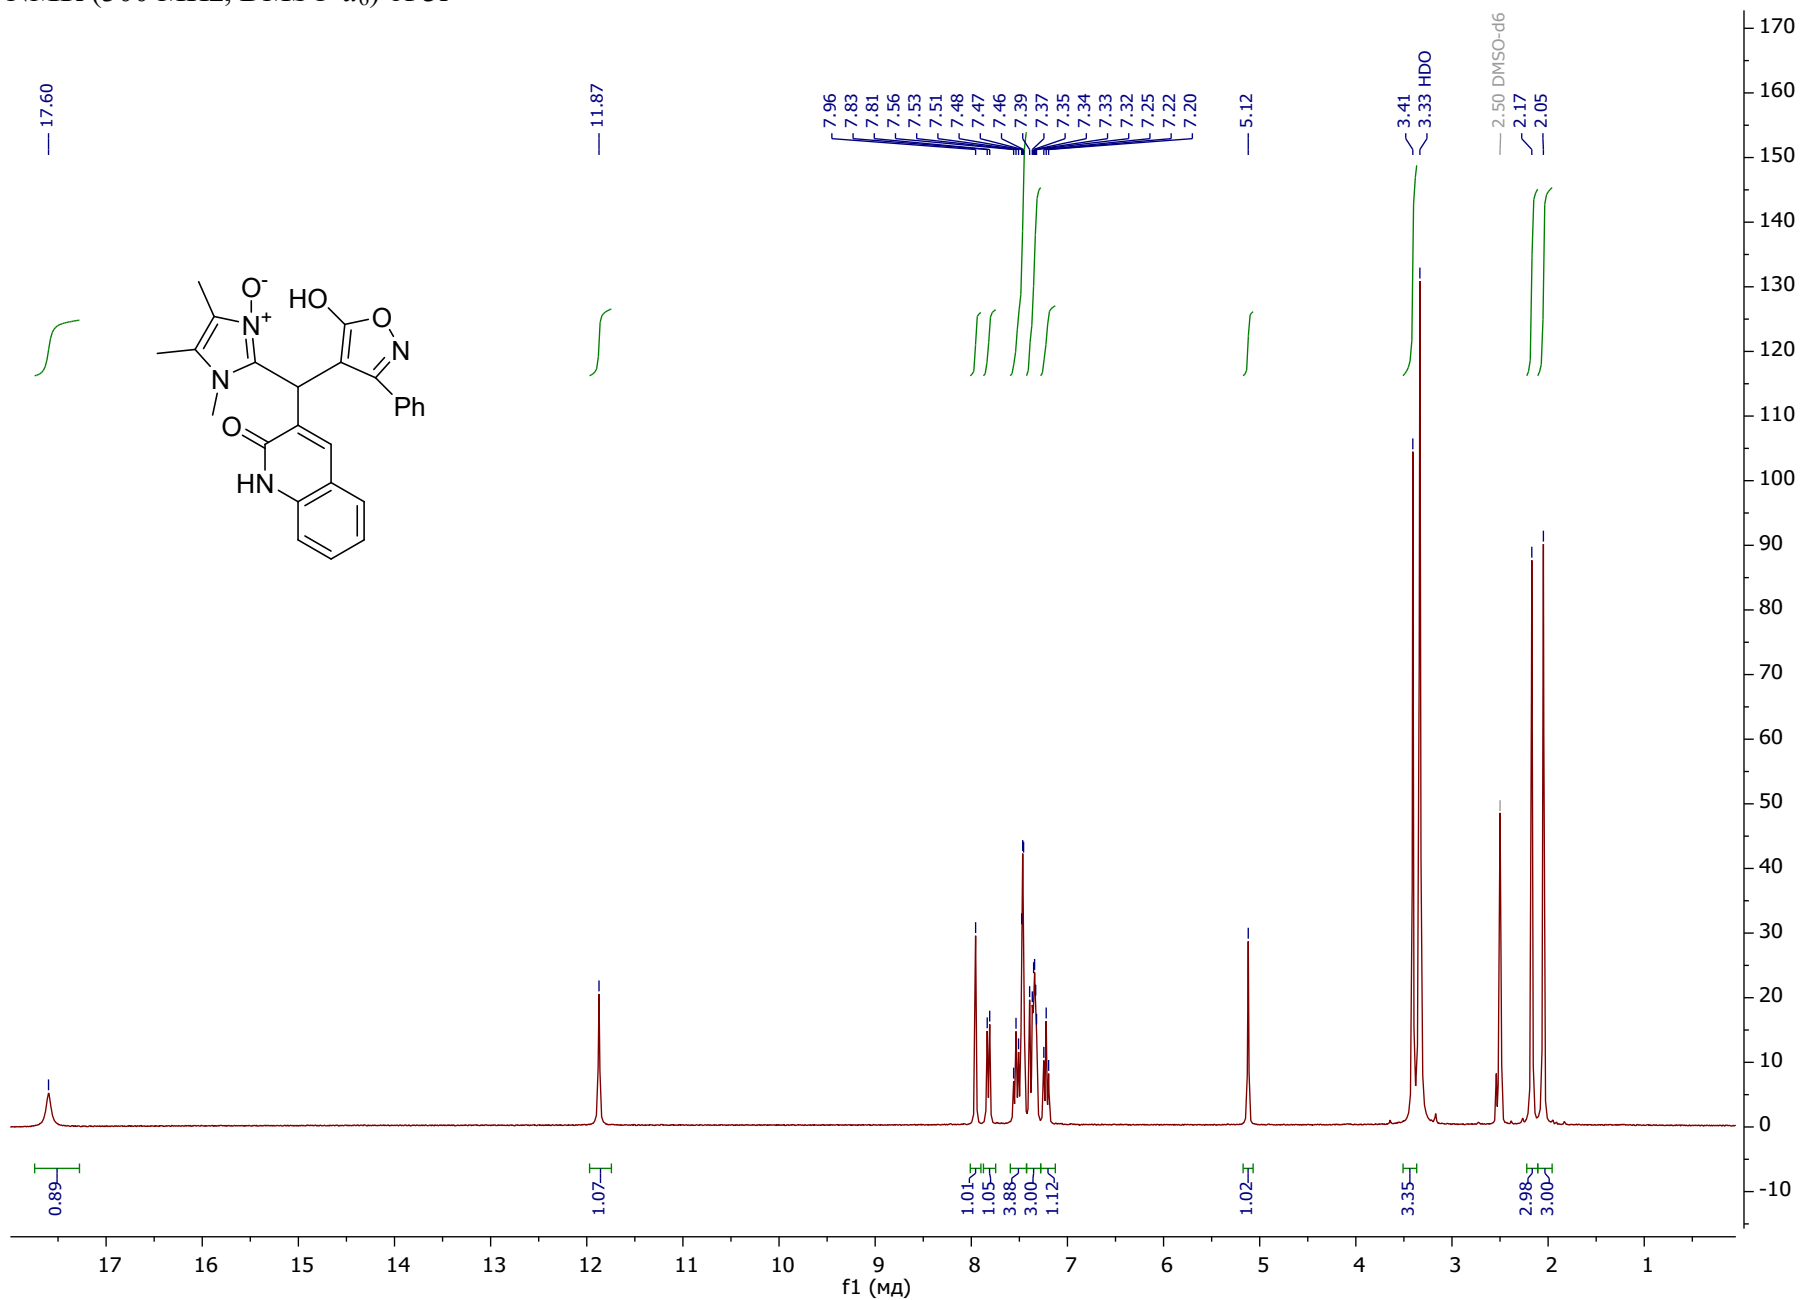

$^{13}\text{C}\{^1\text{H}\}$  NMR (151 MHz,  $\text{DMSO-}d_6$ ) of **3r**

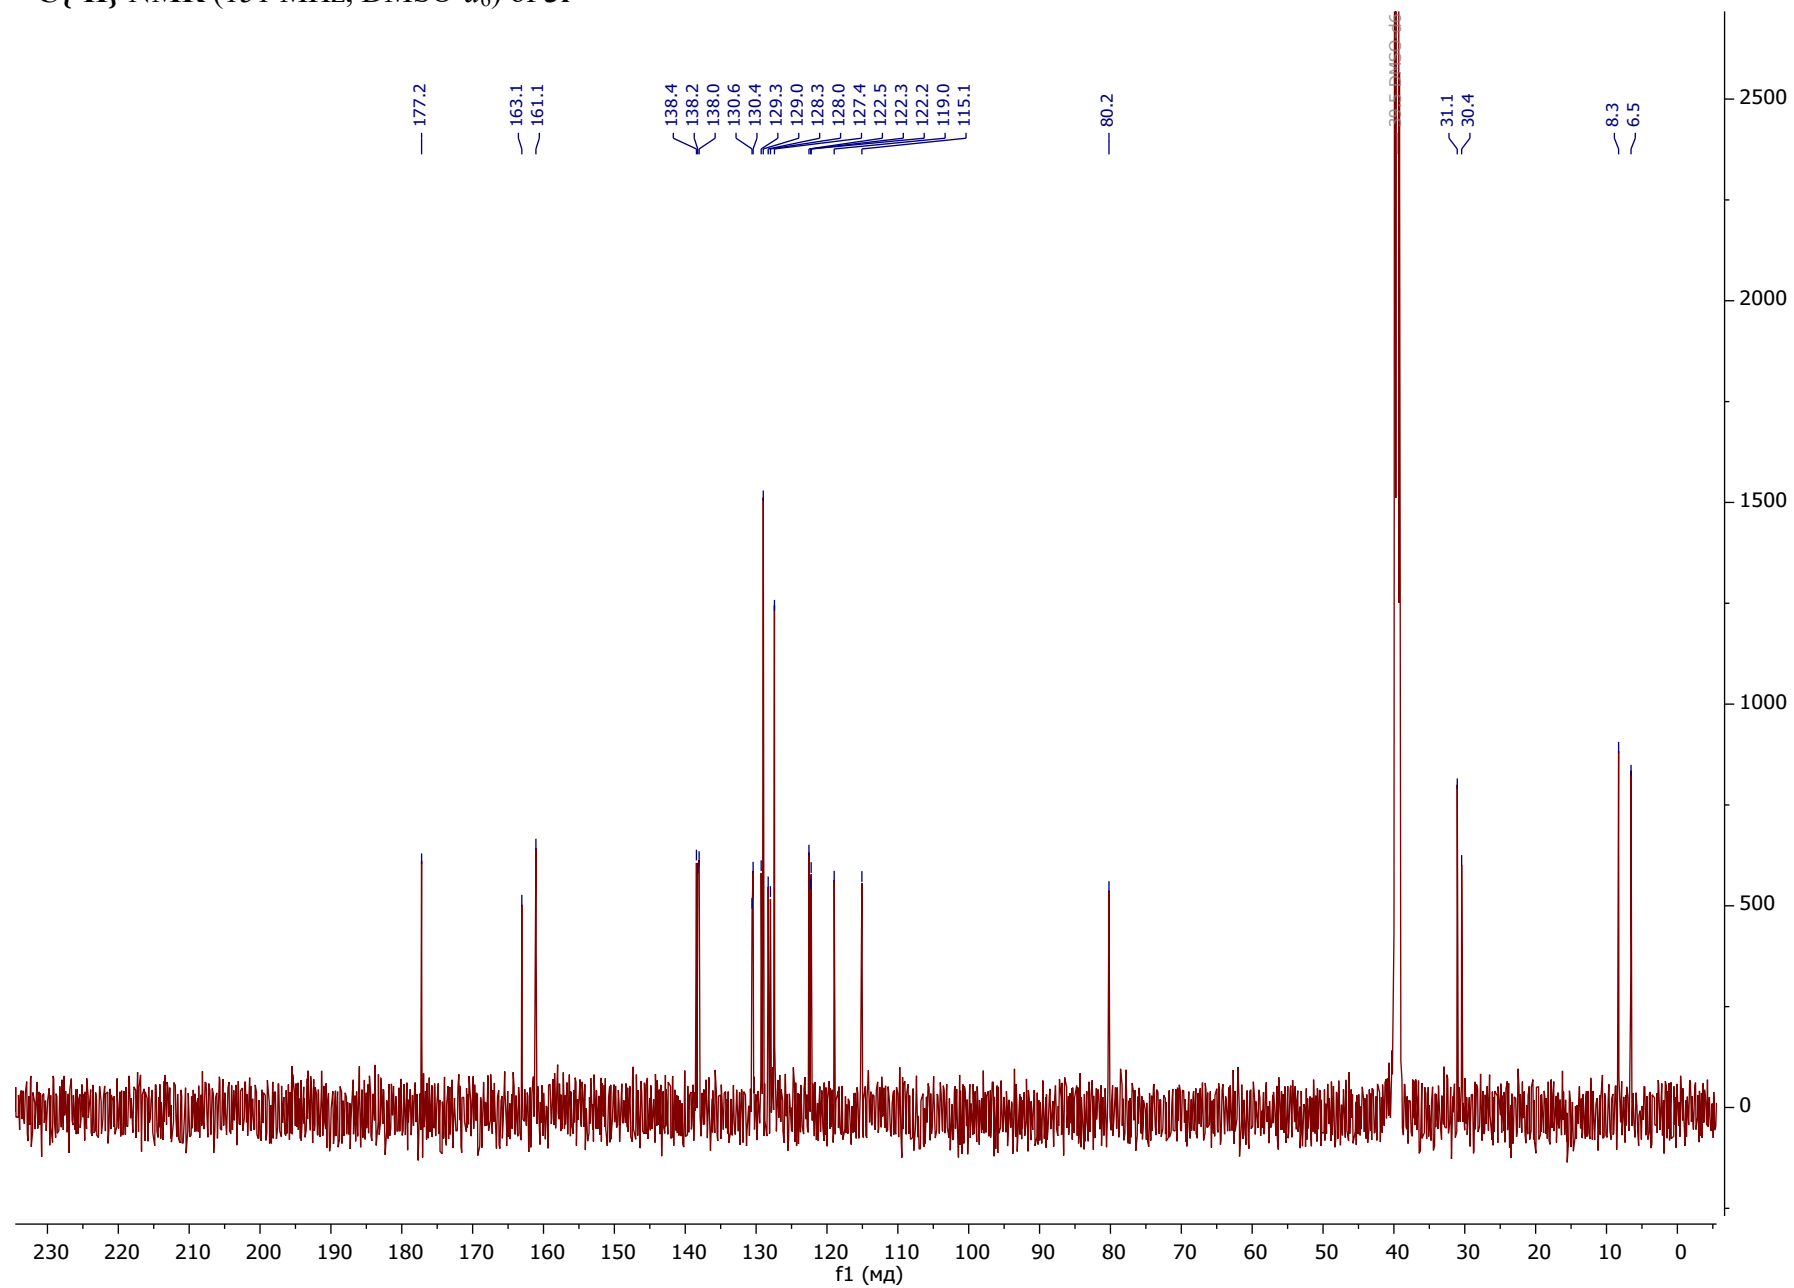

$^1\text{H}$  NMR (400 MHz,  $\text{DMSO-}d_6$ ) of **3s**

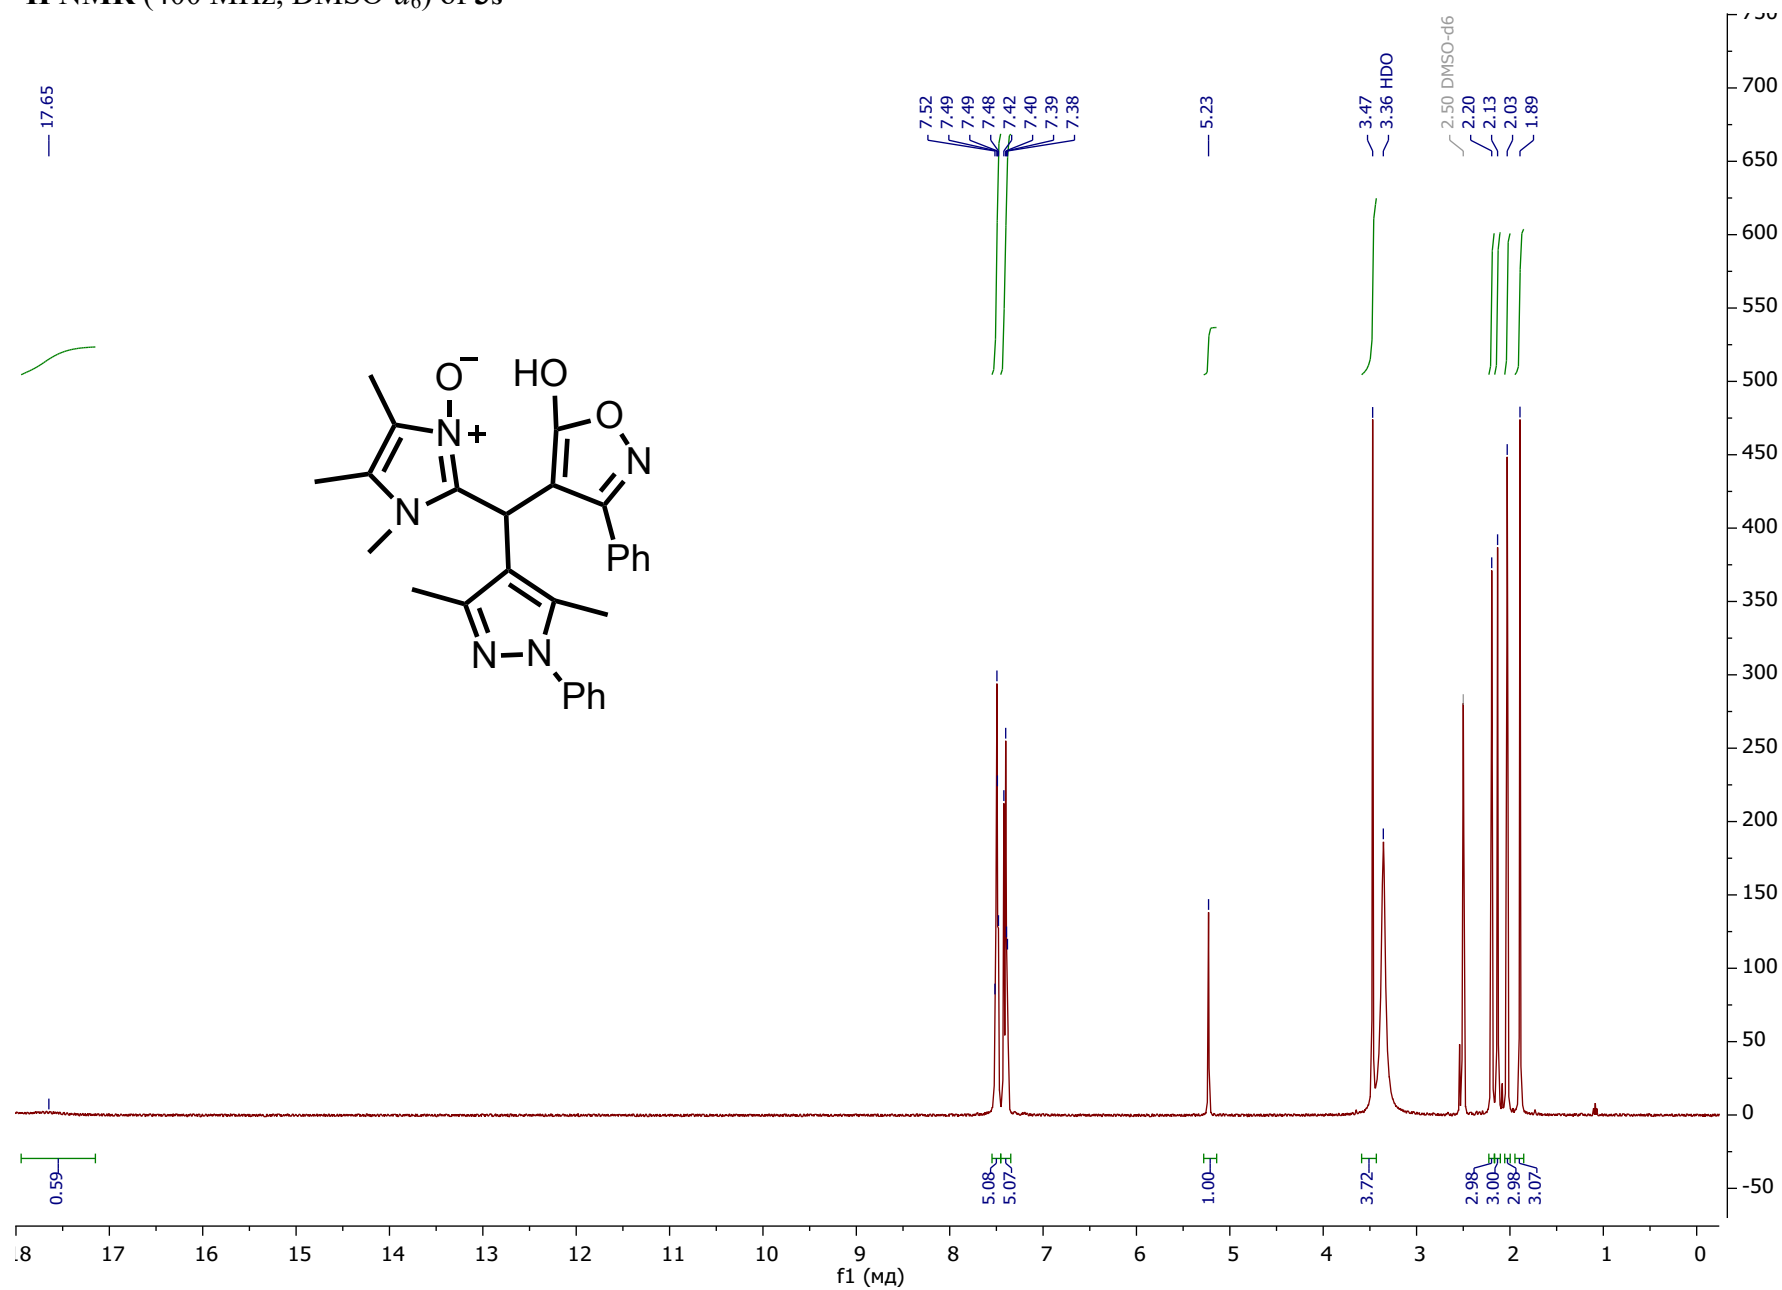

$^{13}\text{C}\{^1\text{H}\}$  NMR (101 MHz, DMSO- $d_6$ ) of **3s**

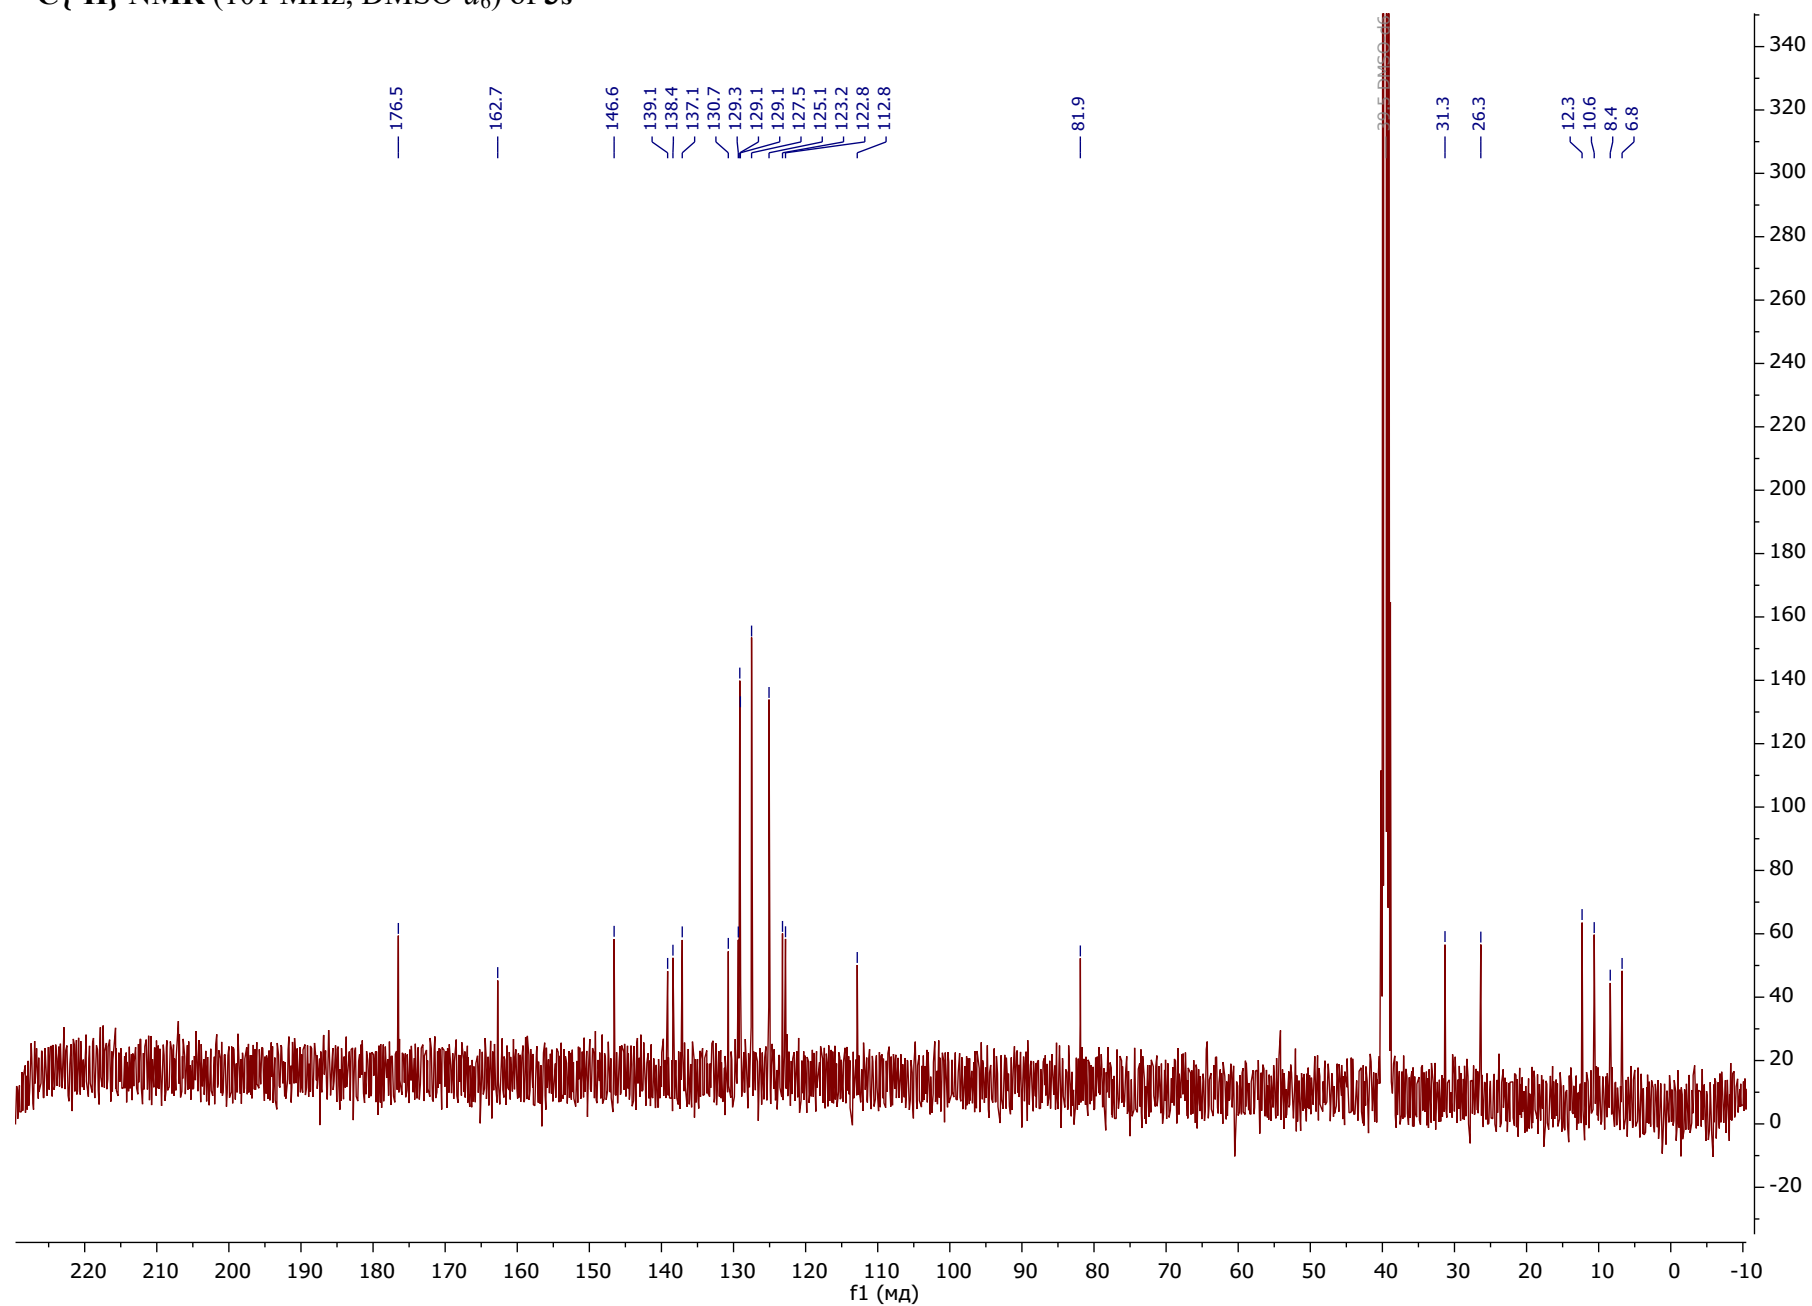



$^1\text{H}$  NMR (600 MHz, DMSO- $d_6$ ) of **3t**

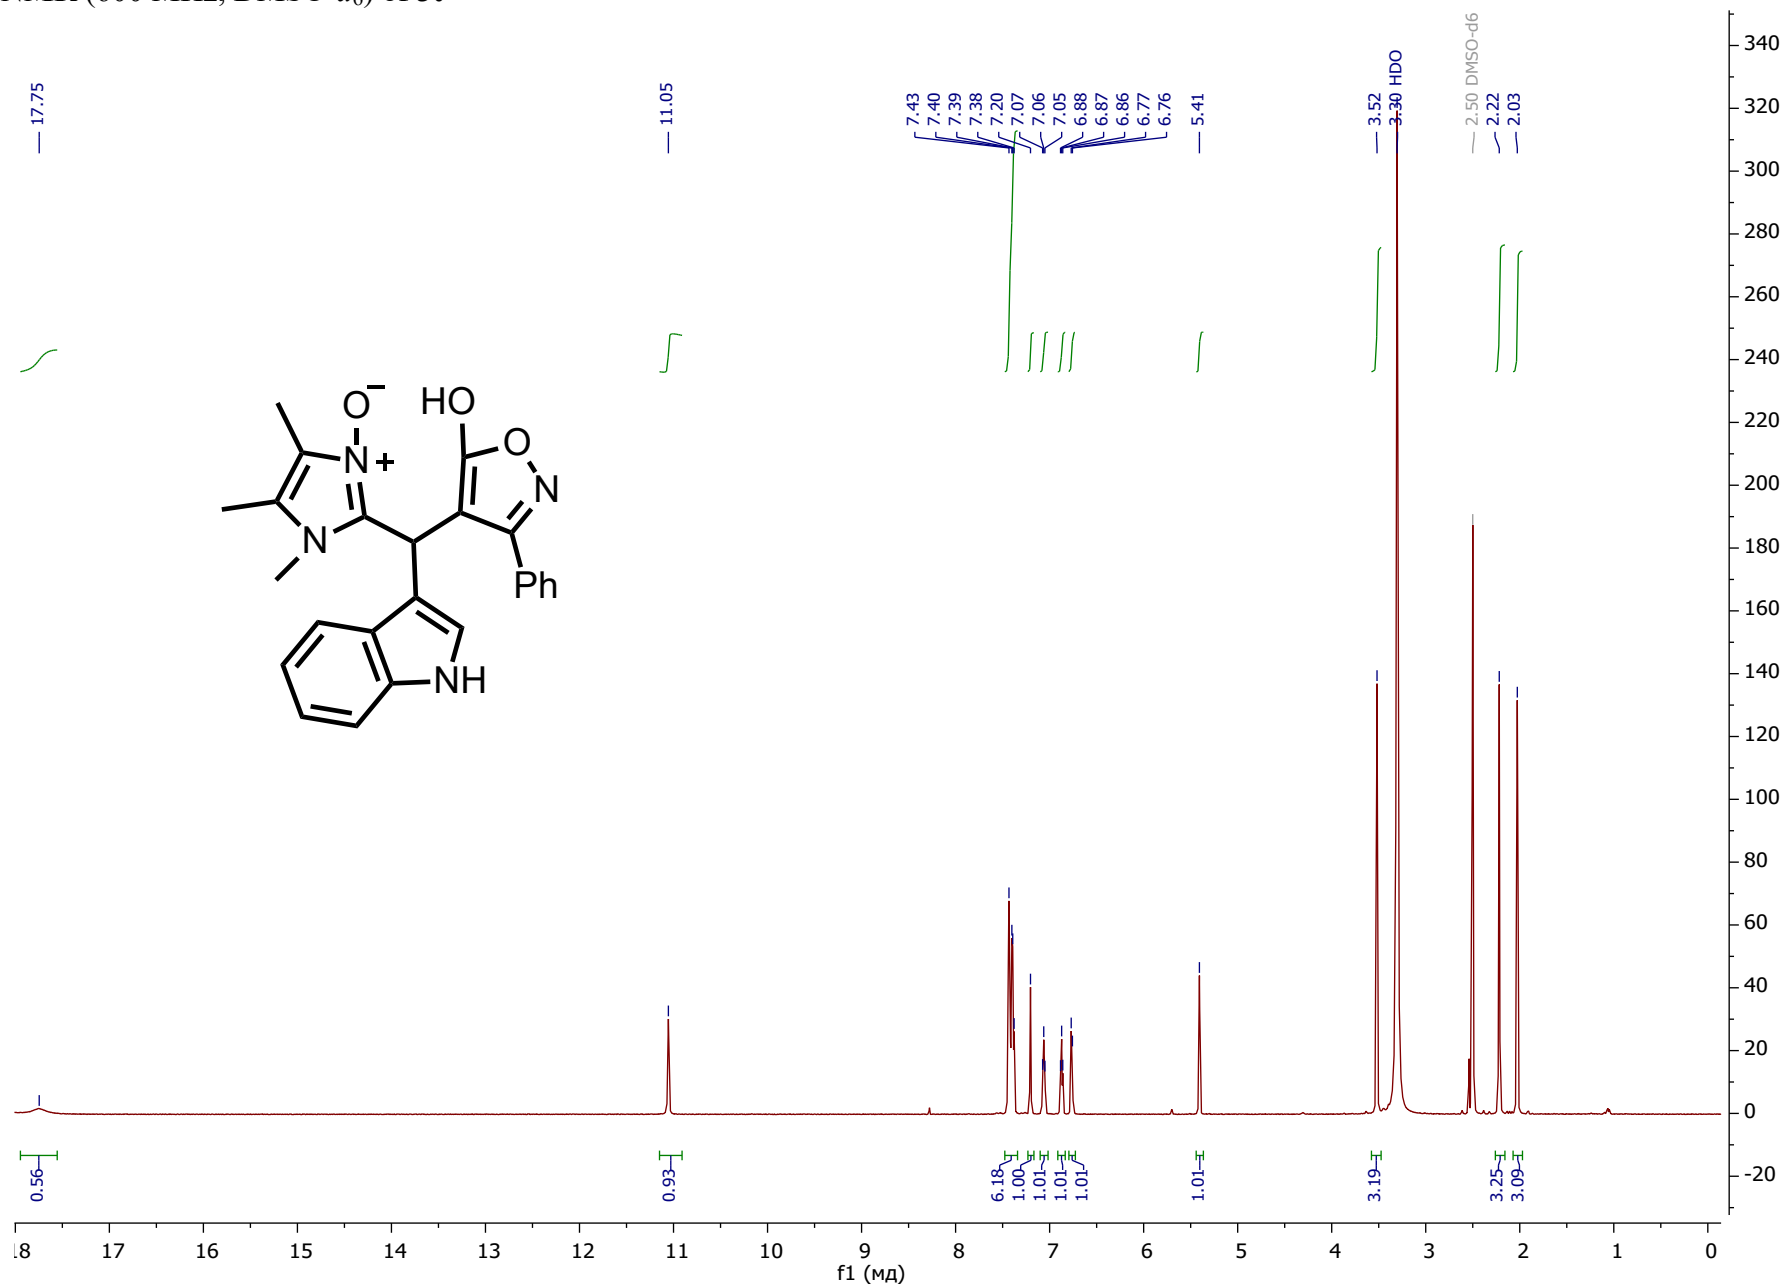

$^{13}\text{C}\{^1\text{H}\}$  NMR (151 MHz,  $\text{DMSO-}d_6$ ) of **3t**

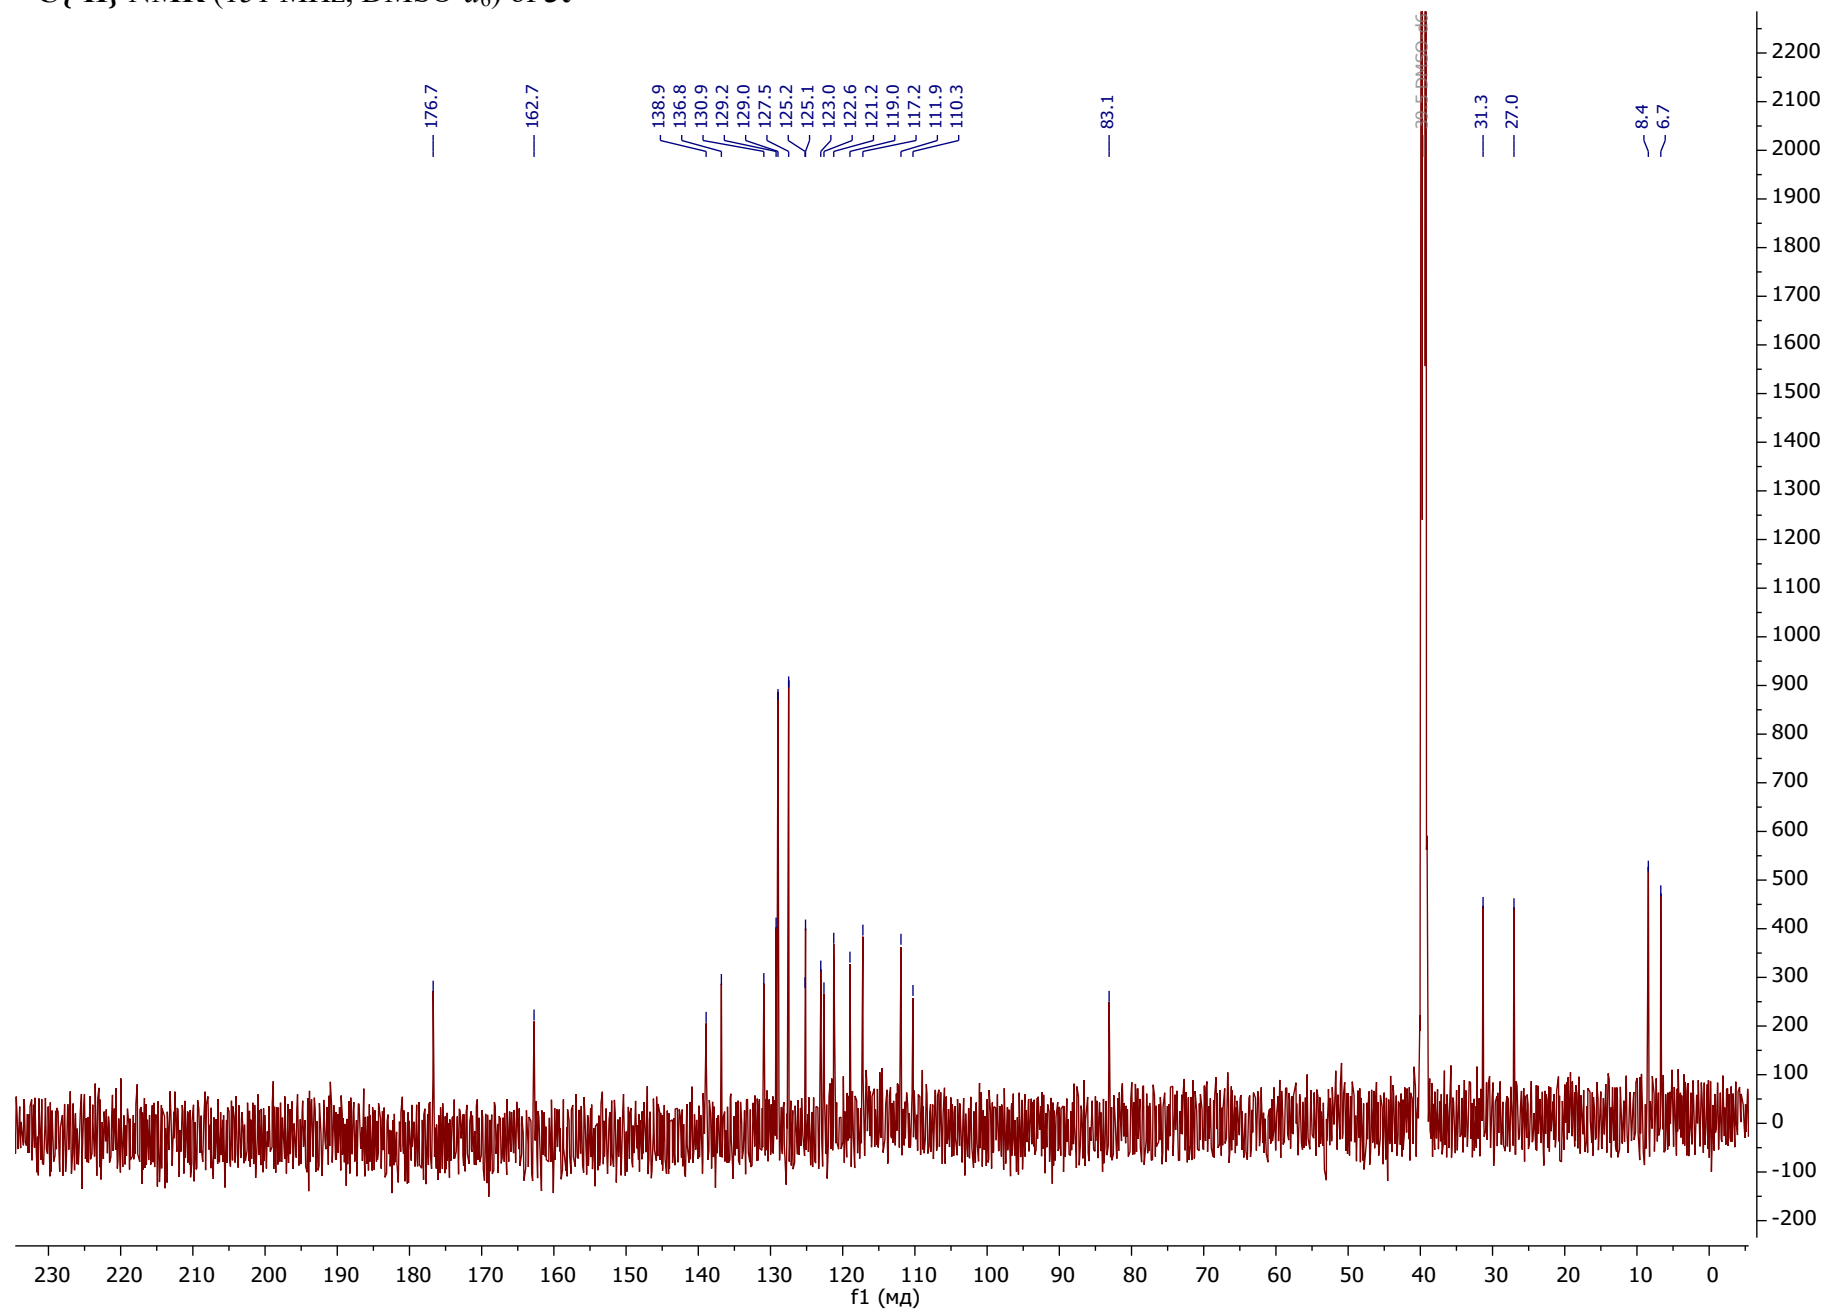

<sup>1</sup>H NMR (400 MHz, DMSO-d<sub>6</sub>) of **4a**

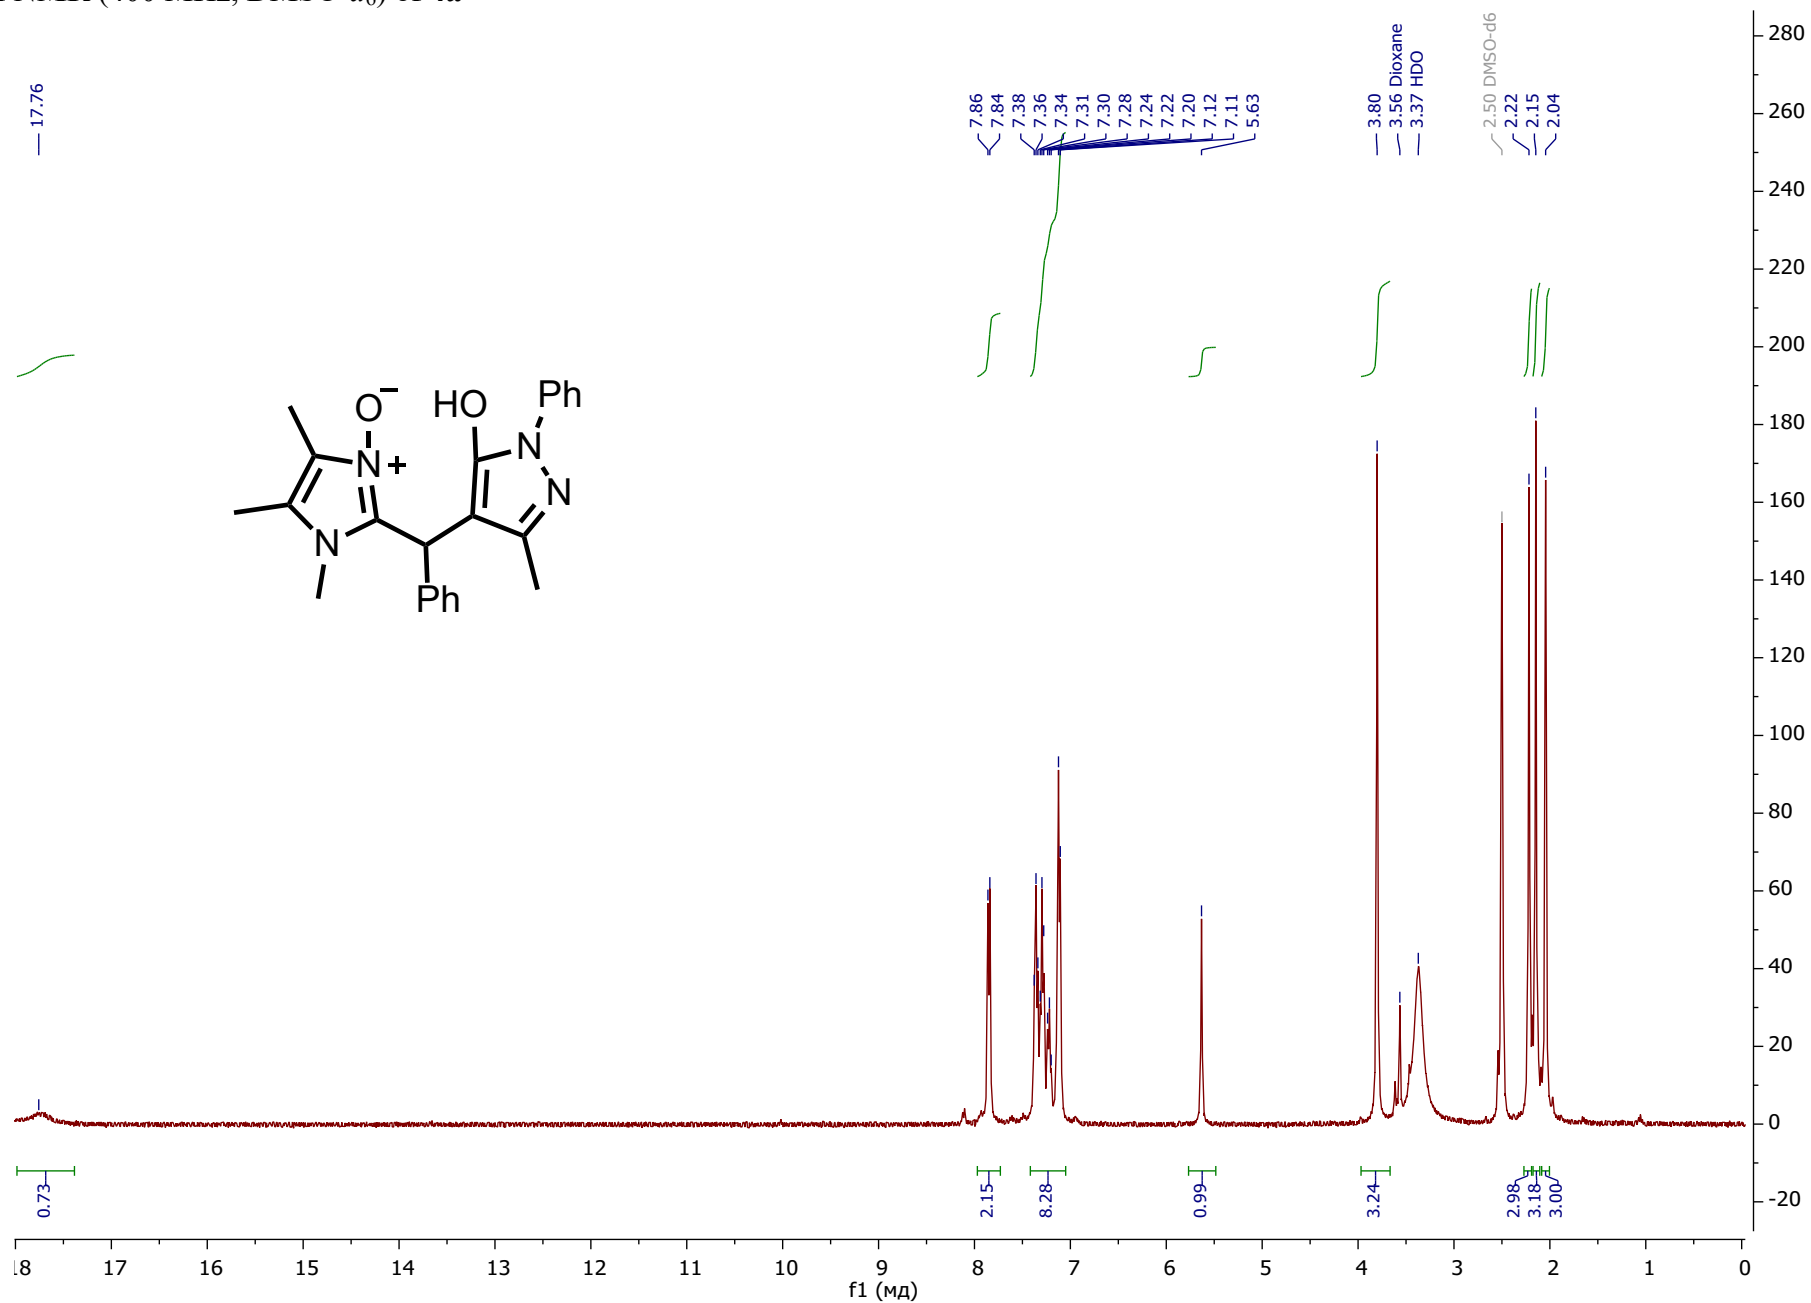

$^{13}\text{C}\{^1\text{H}\}$  NMR (101 MHz, DMSO- $d_6$ ) of **4a**

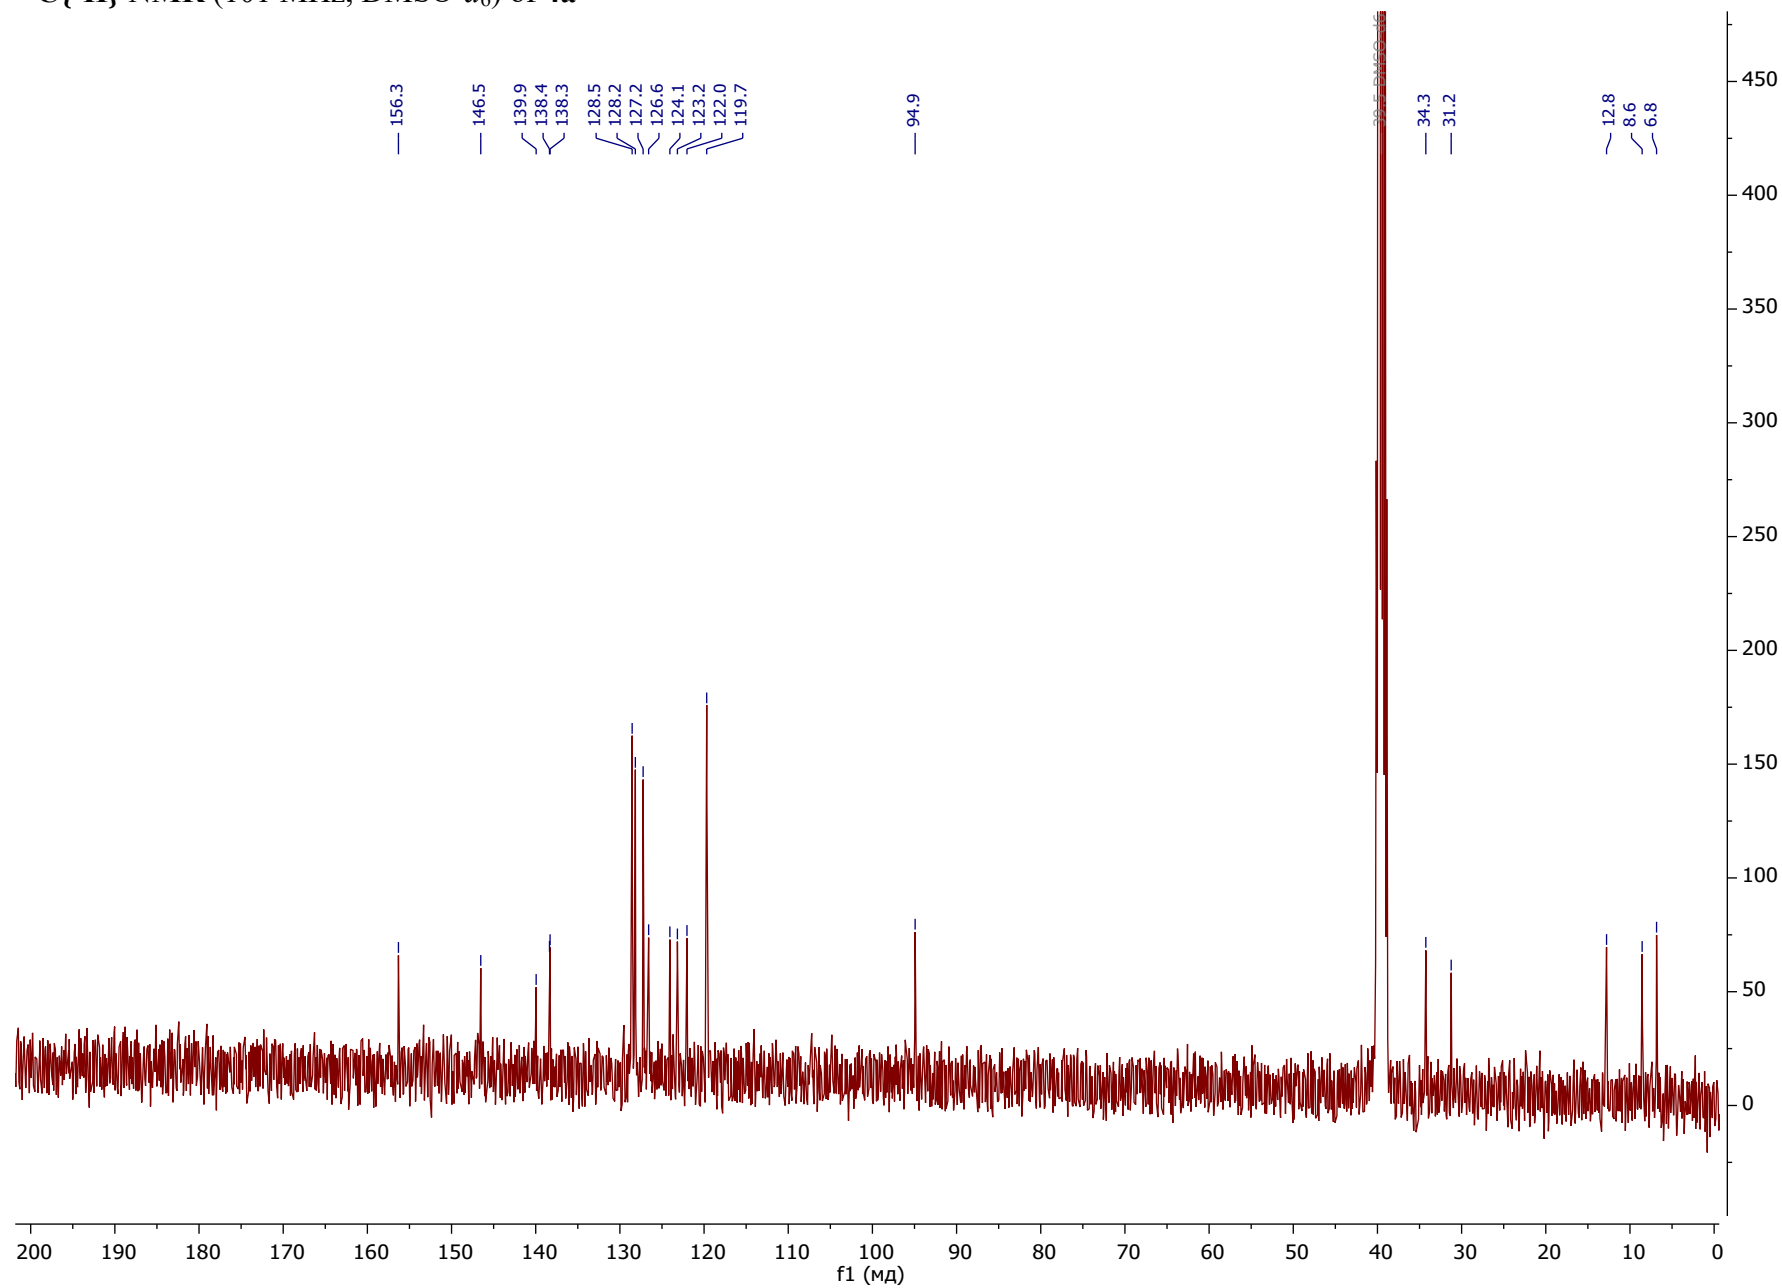

<sup>1</sup>H NMR (400 MHz, DMSO-d<sub>6</sub>) of **4b**

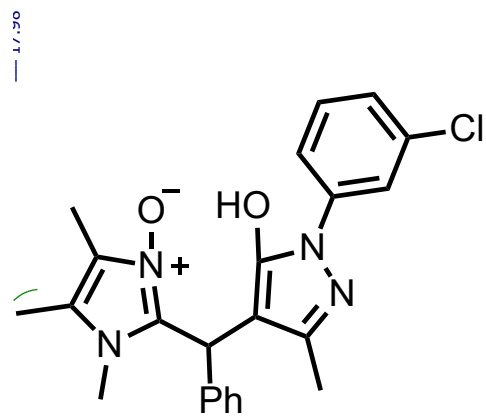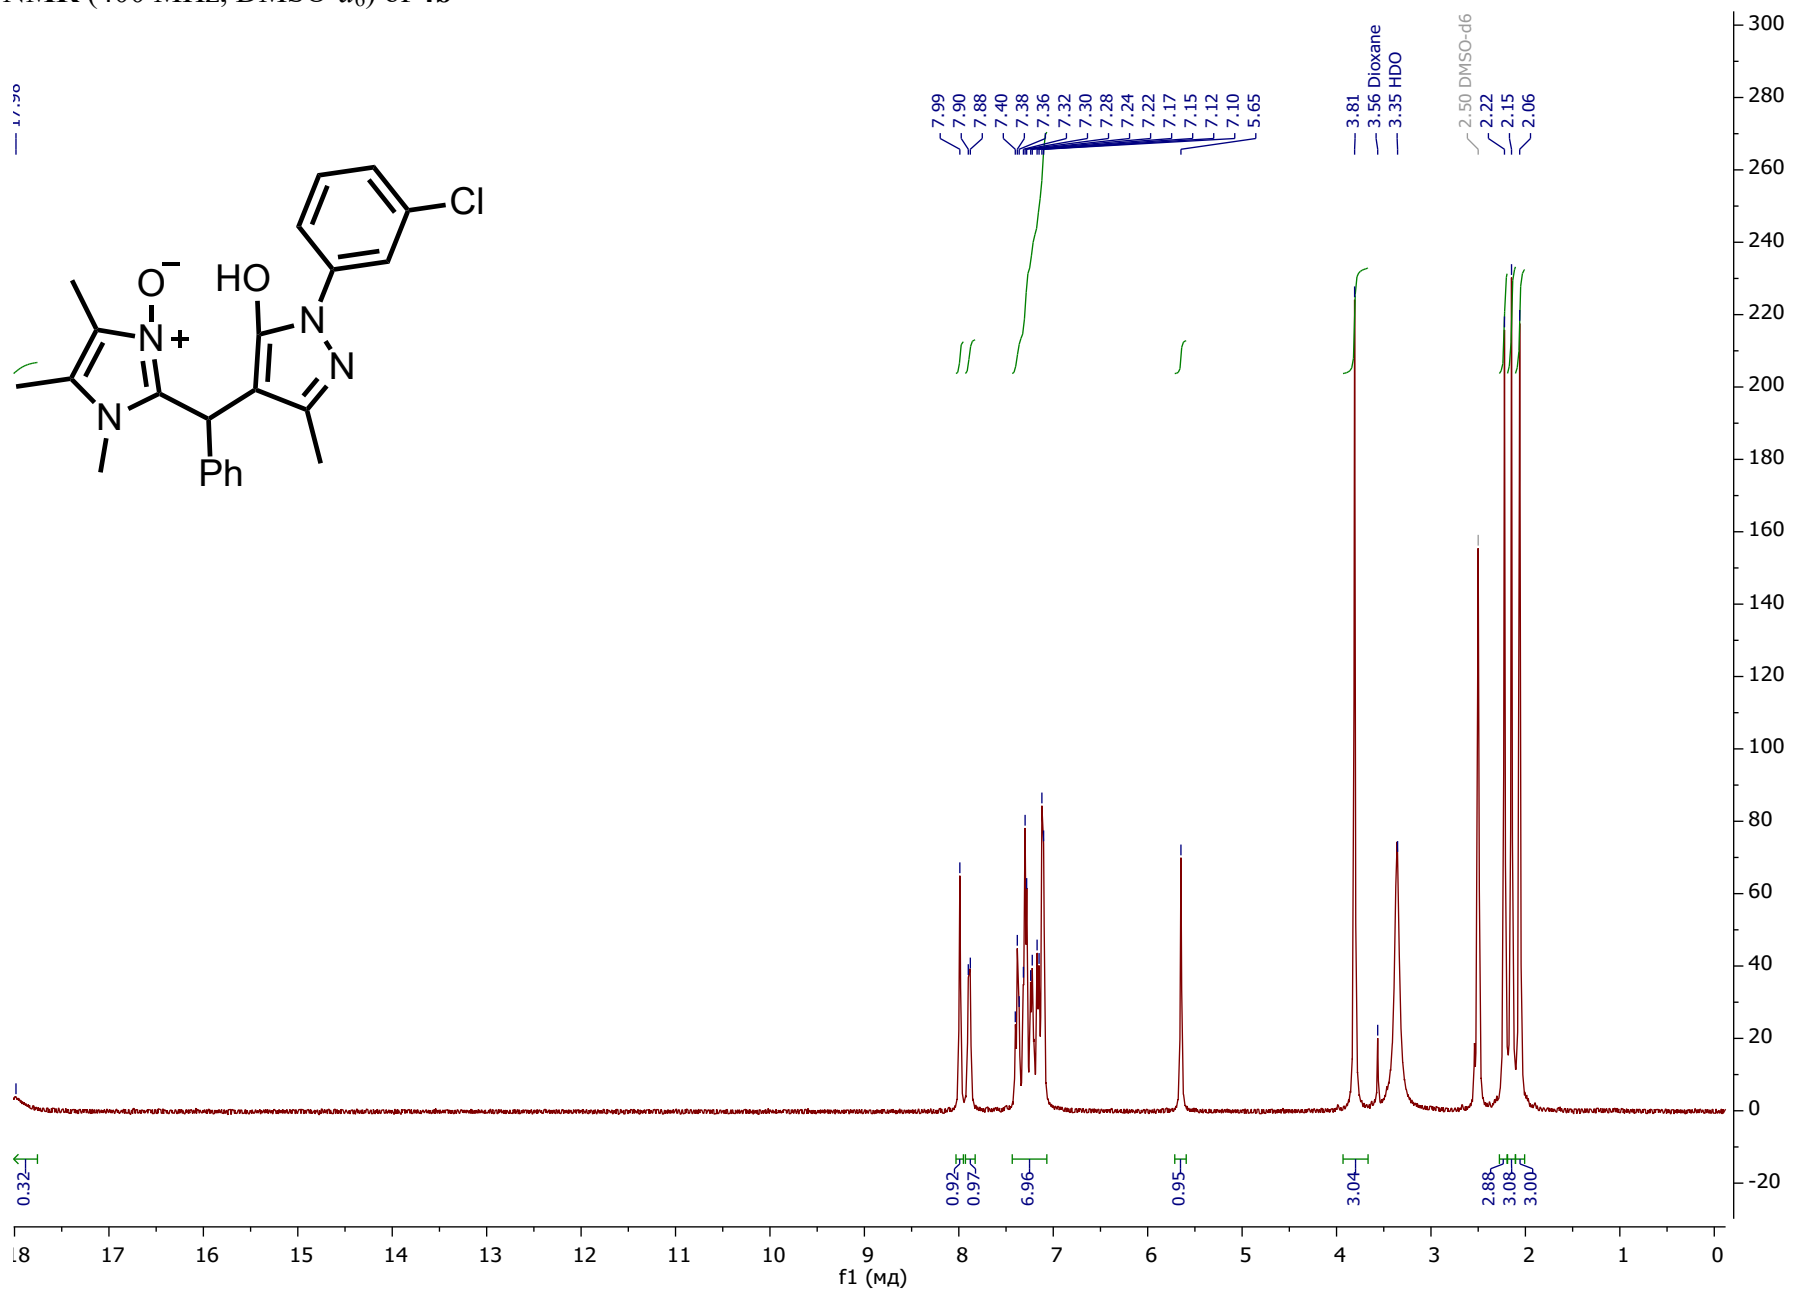

$^{13}\text{C}\{^1\text{H}\}$  NMR (151 MHz, DMSO- $d_6$ ) of **4b**

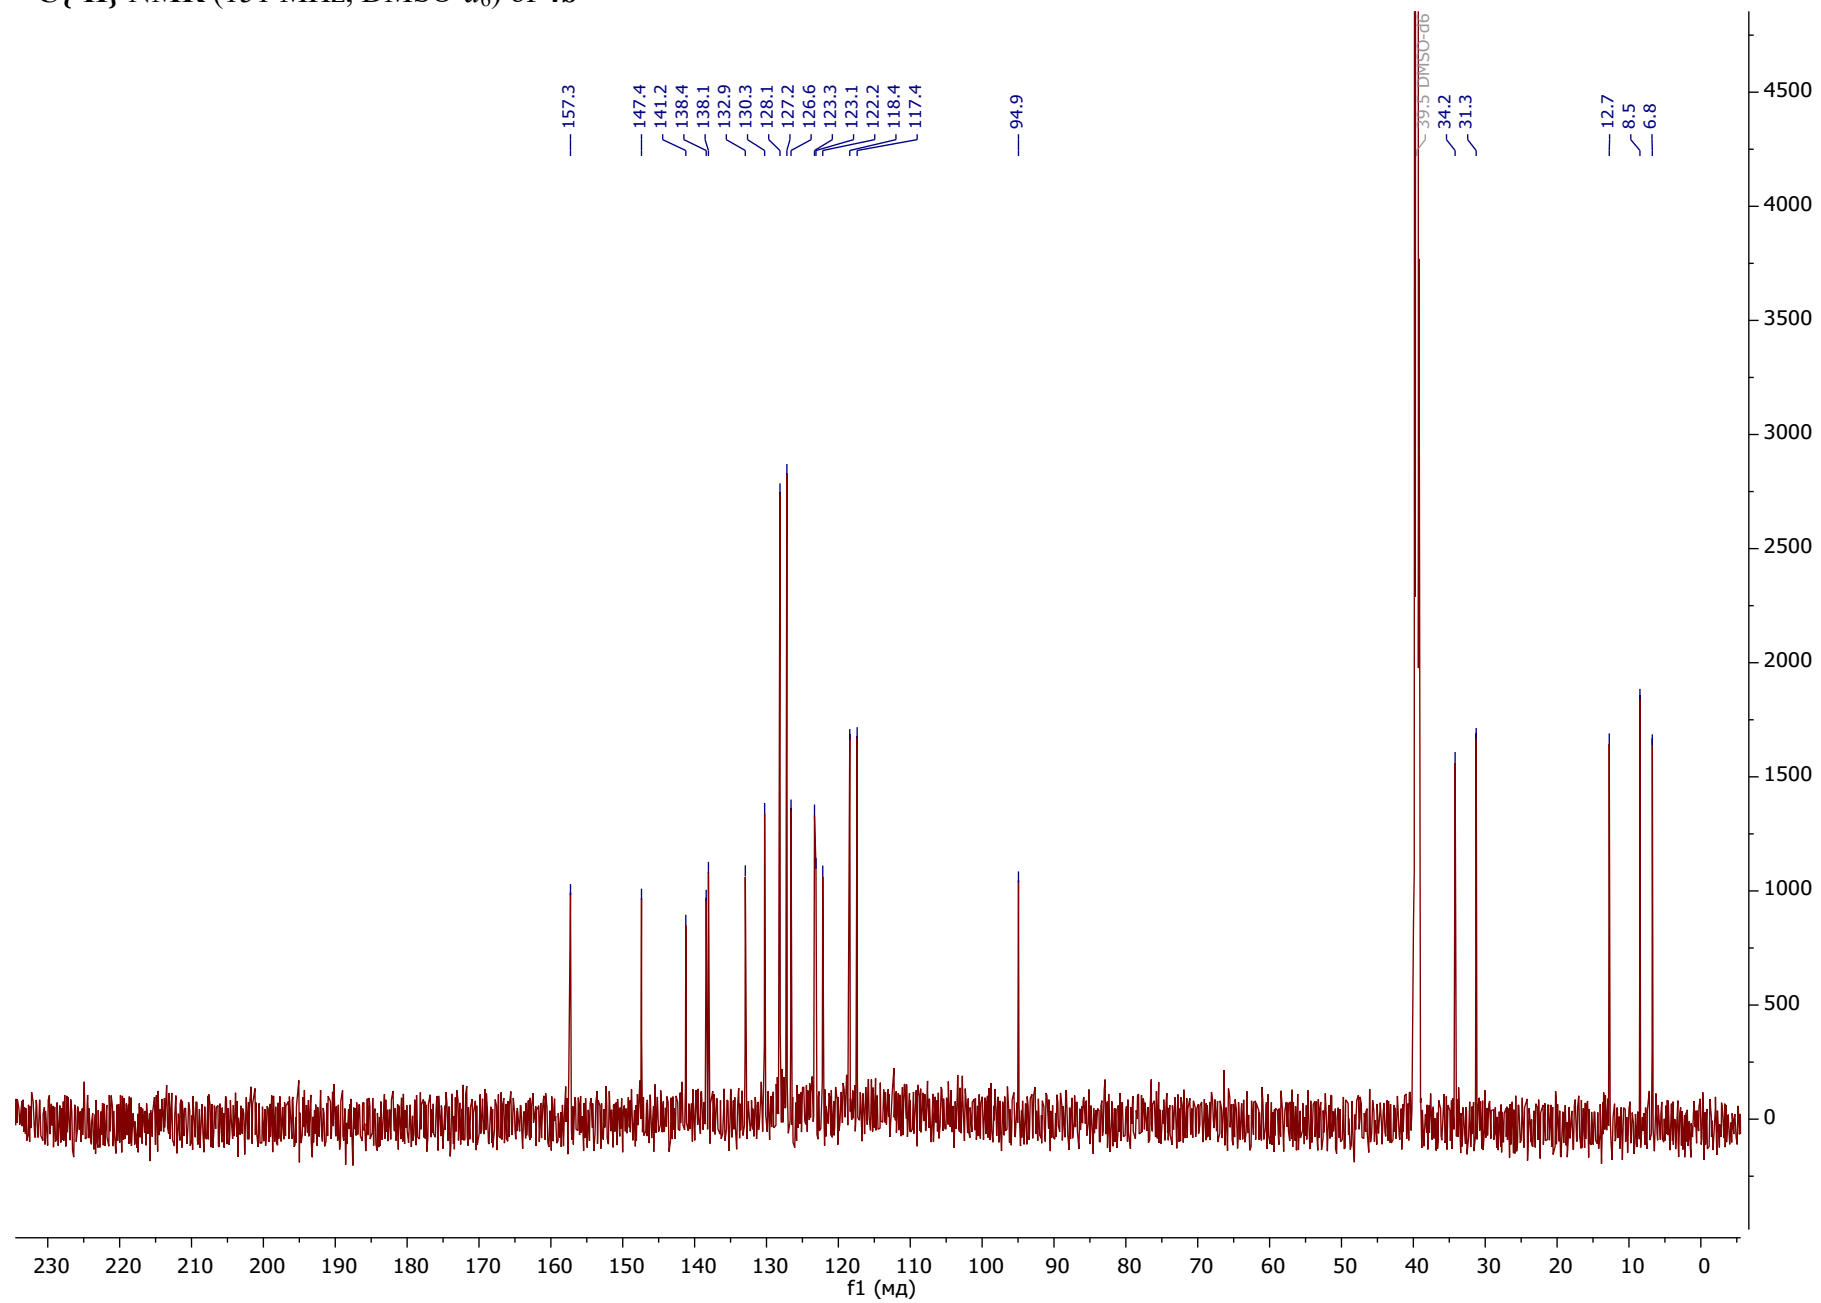

<sup>1</sup>H NMR (400 MHz, DMSO-d<sub>6</sub>) of **4c**

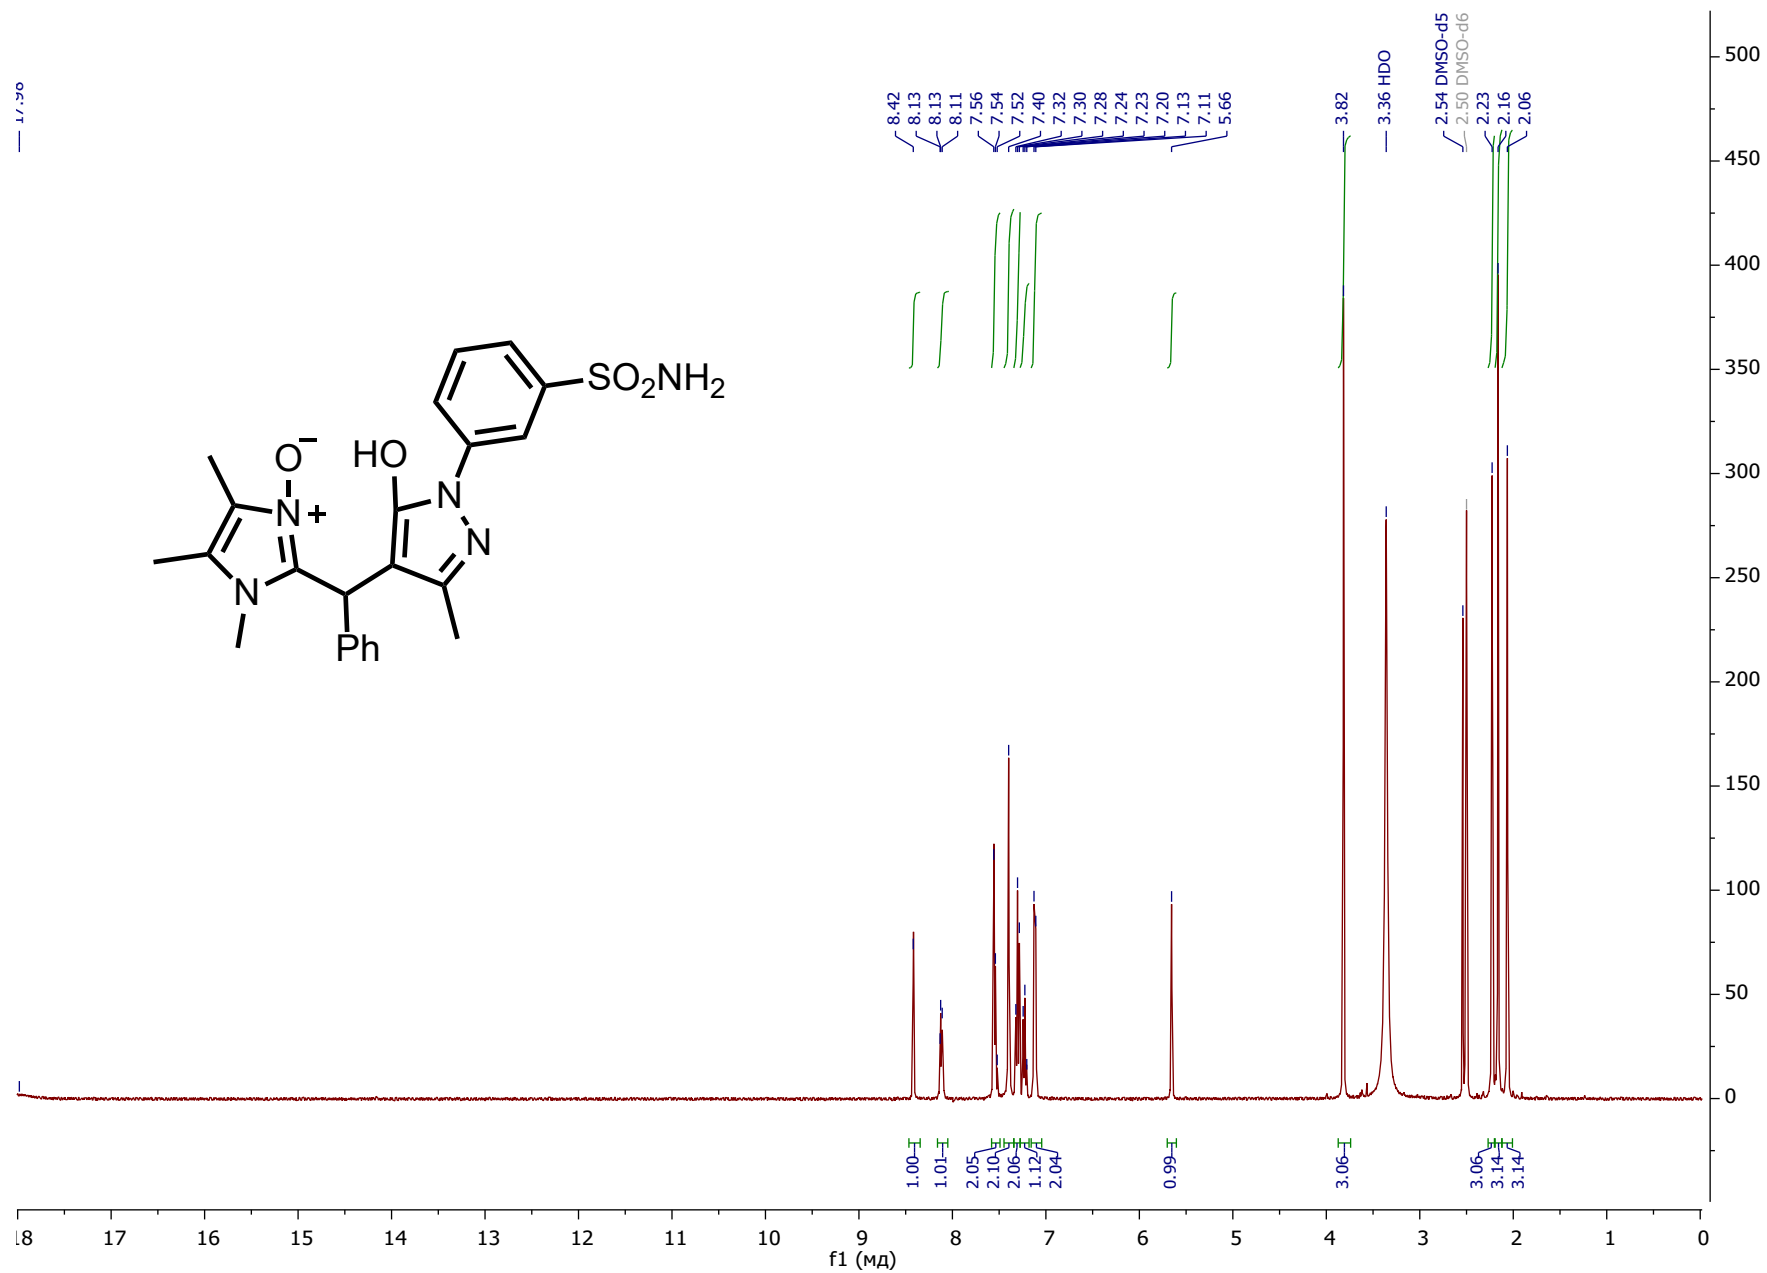

$^{13}\text{C}\{^1\text{H}\}$  NMR (151 MHz,  $\text{DMSO-}d_6$ ) of **4c**

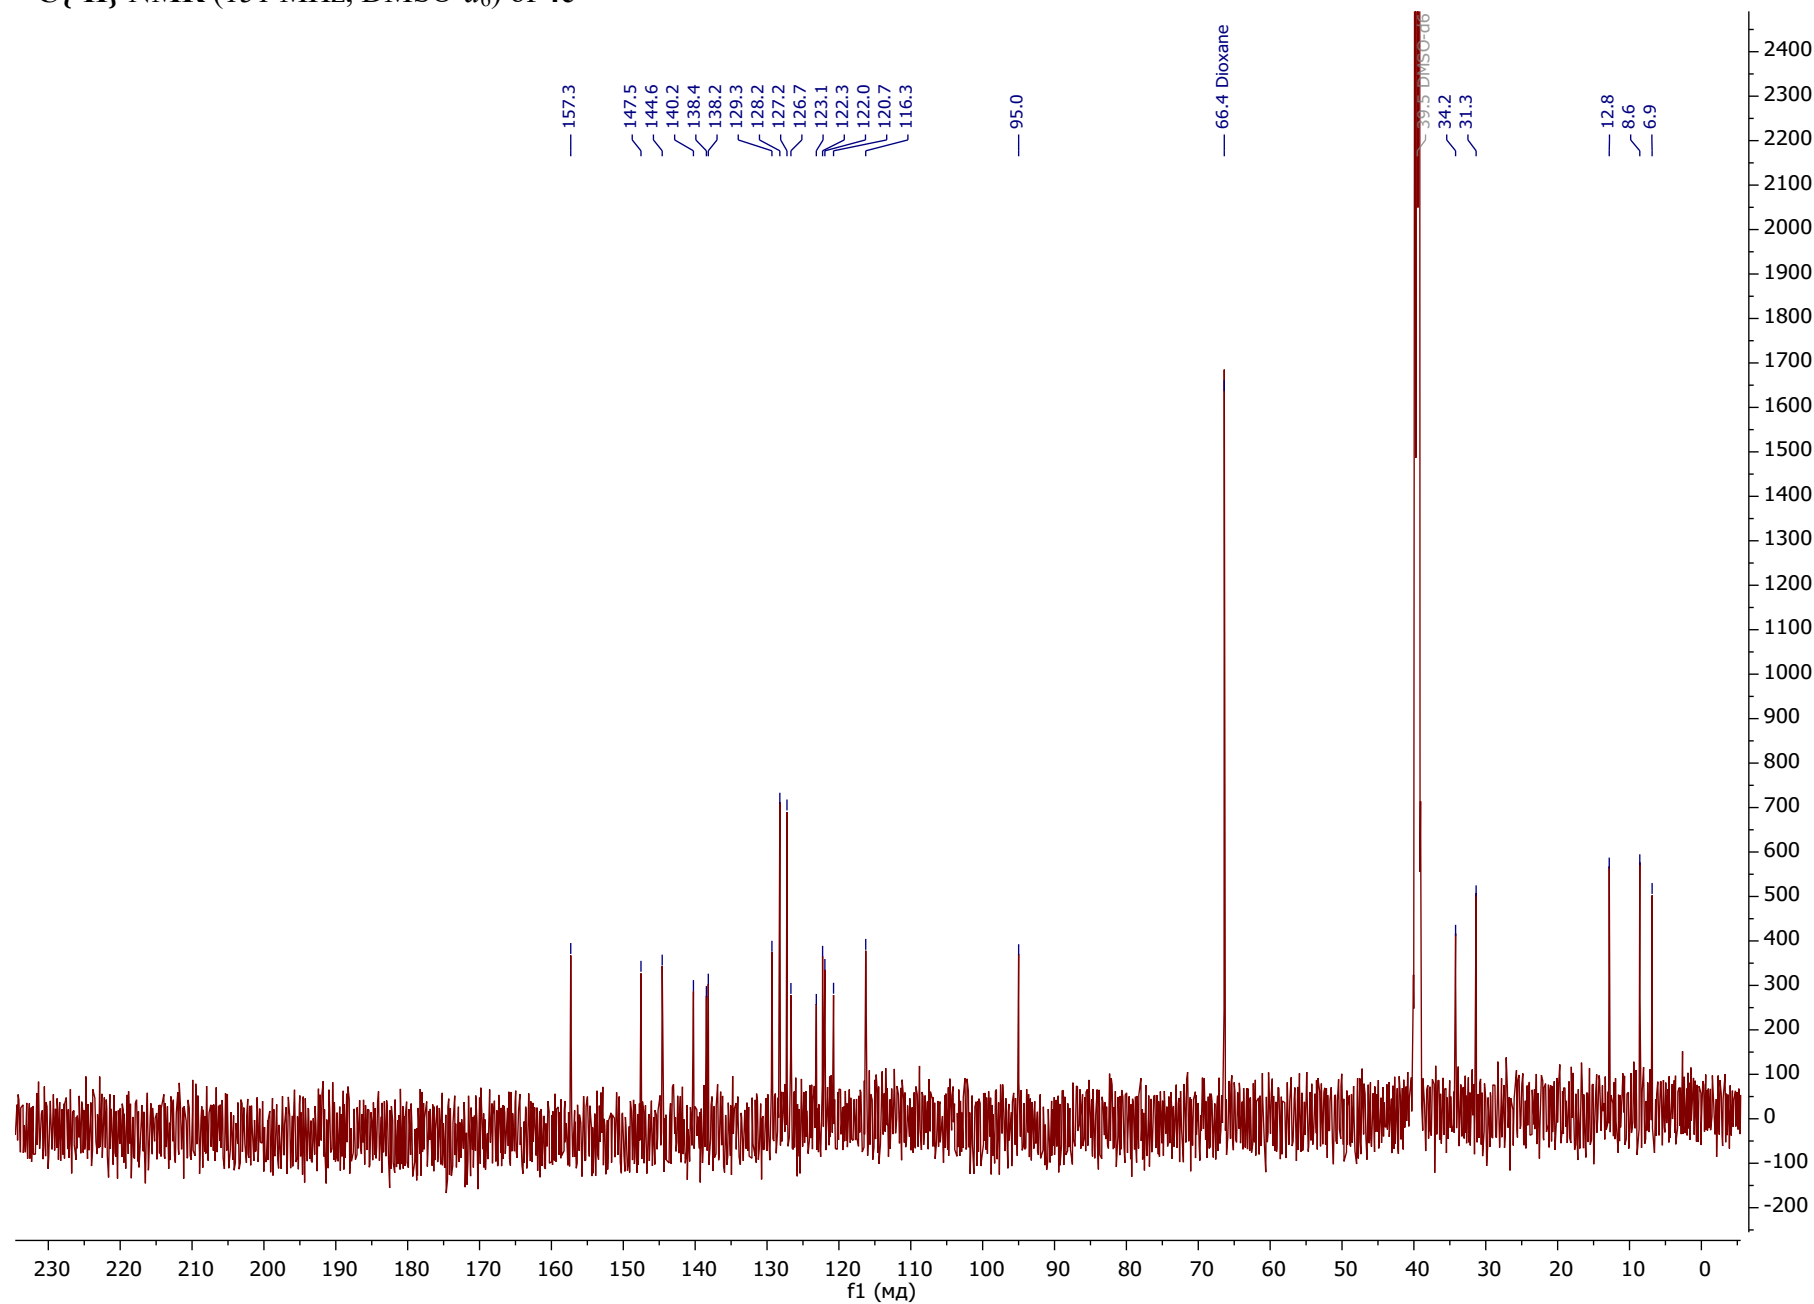



<sup>1</sup>H NMR (400 MHz, DMSO-d<sub>6</sub>) of **5**

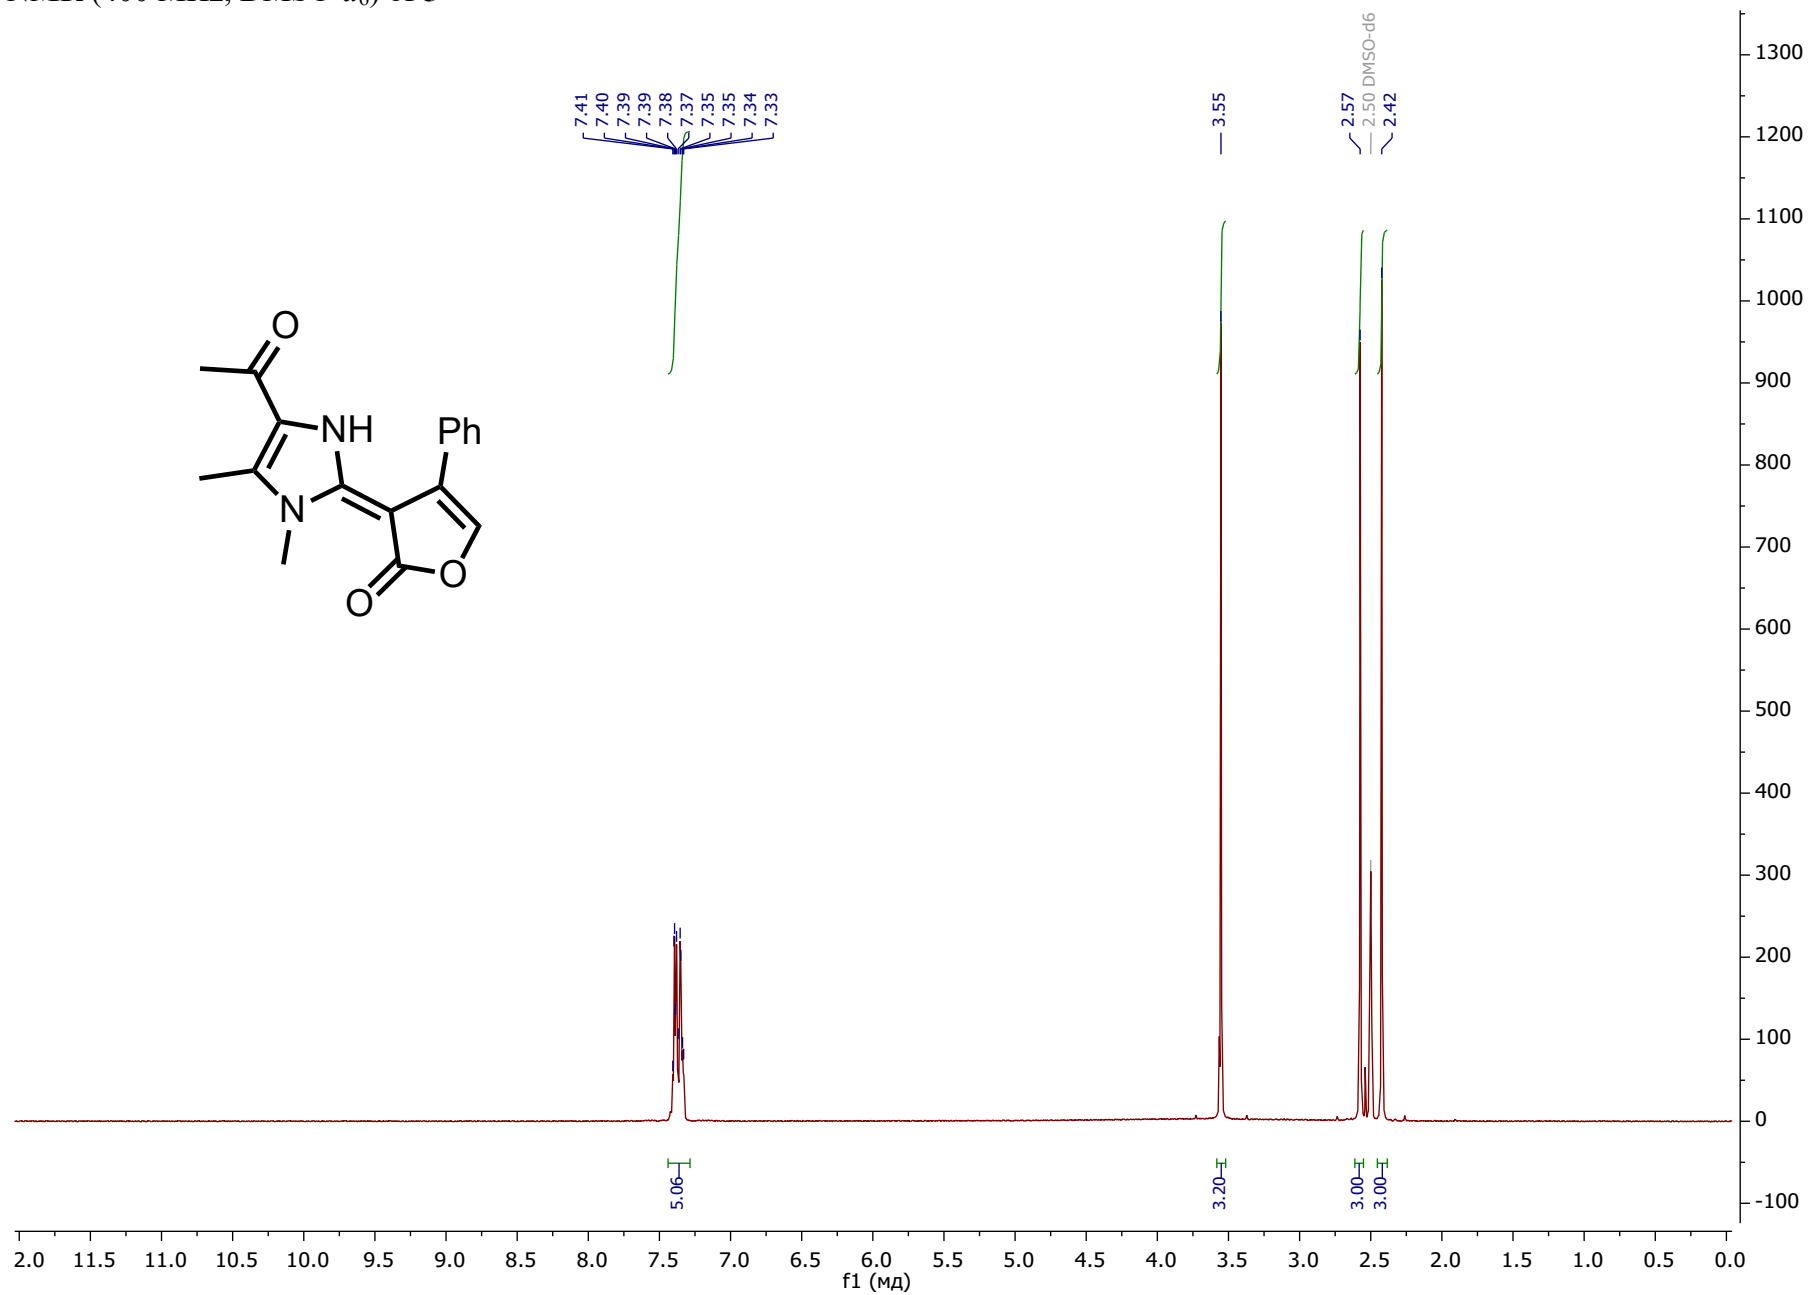

$^{13}\text{C}\{^1\text{H}\}$  NMR (151 MHz,  $\text{DMSO-}d_6$ ) of **5**

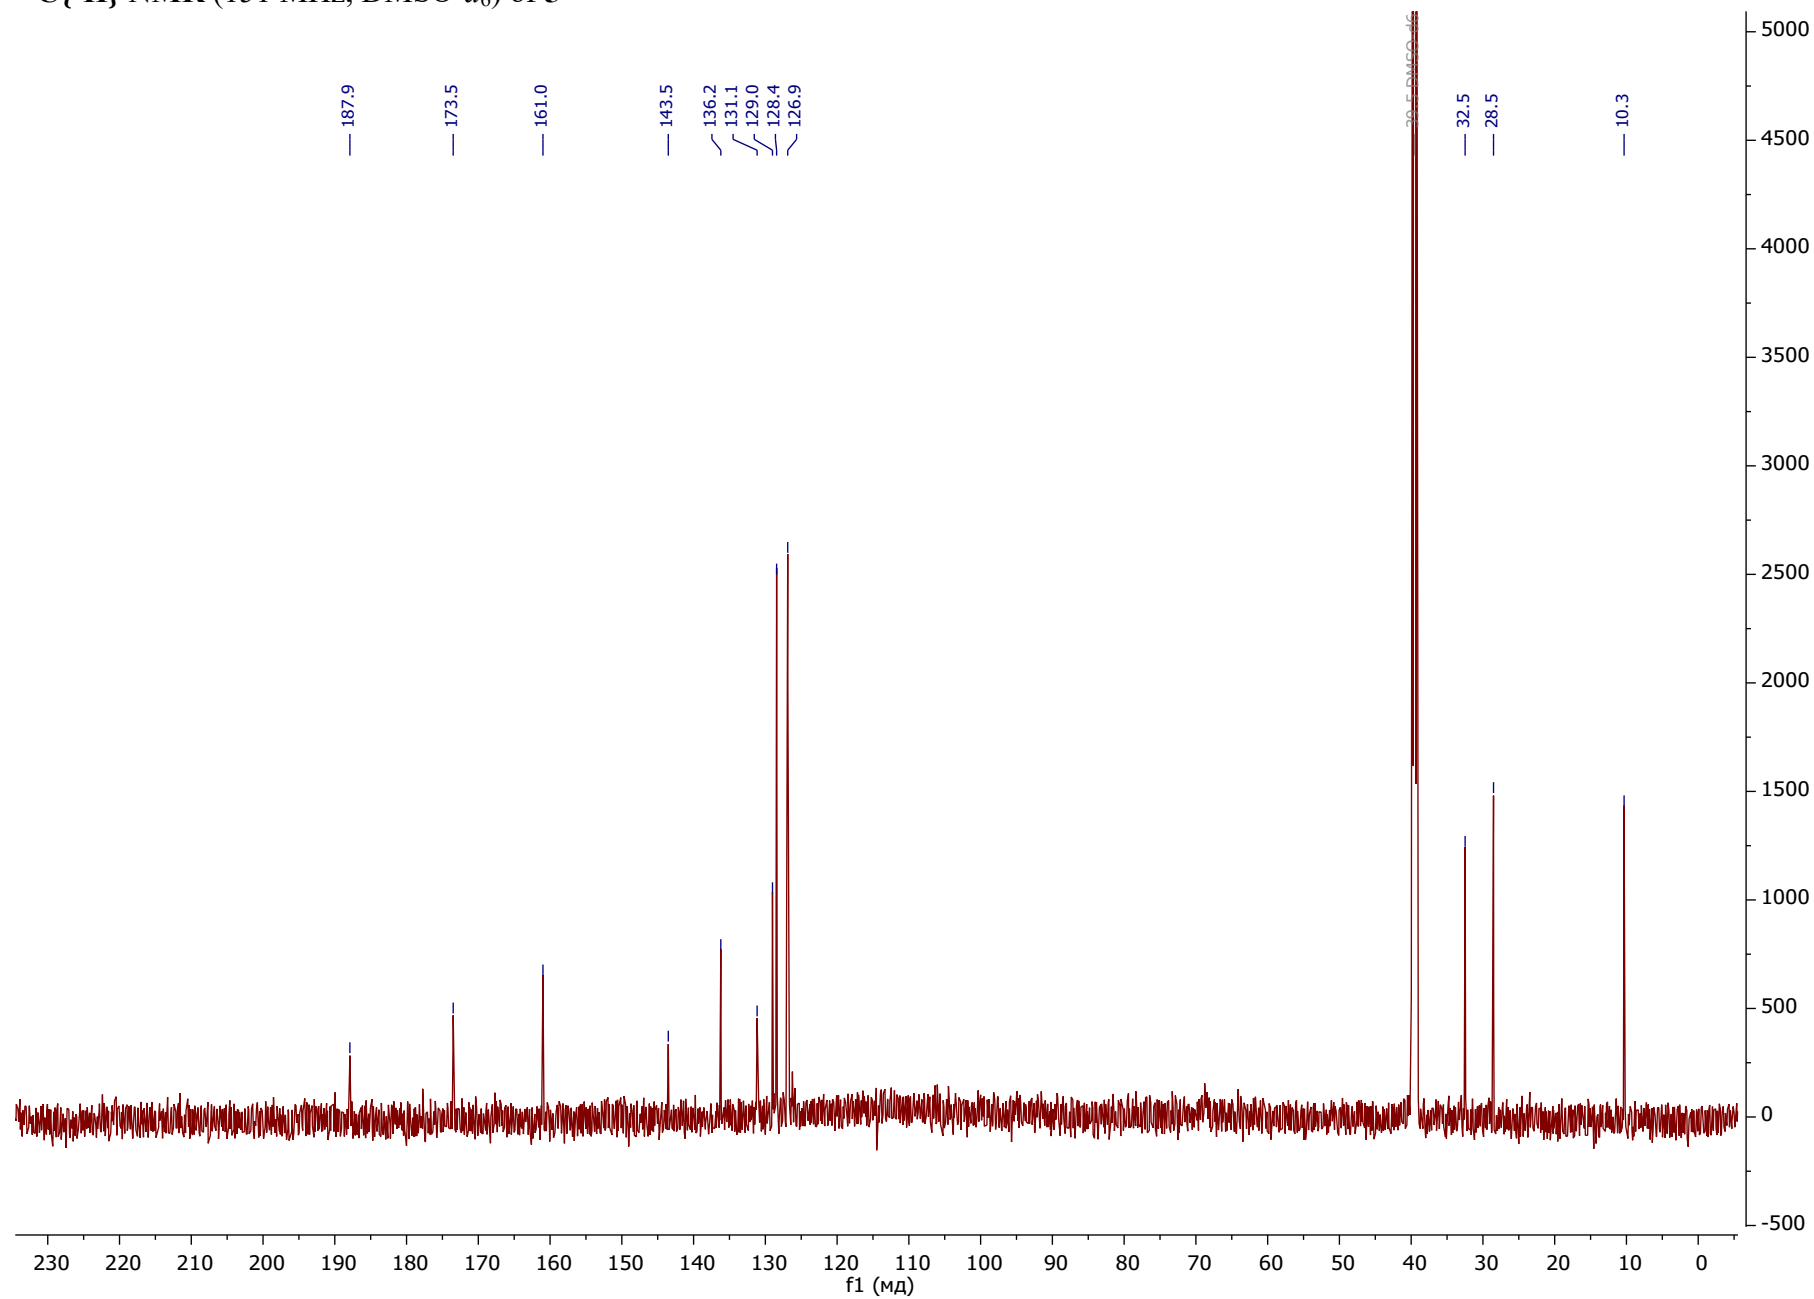

<sup>1</sup>H NMR (400 MHz, DMSO-d<sub>6</sub>) of 6a

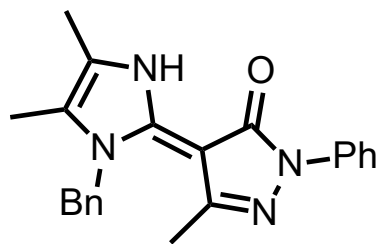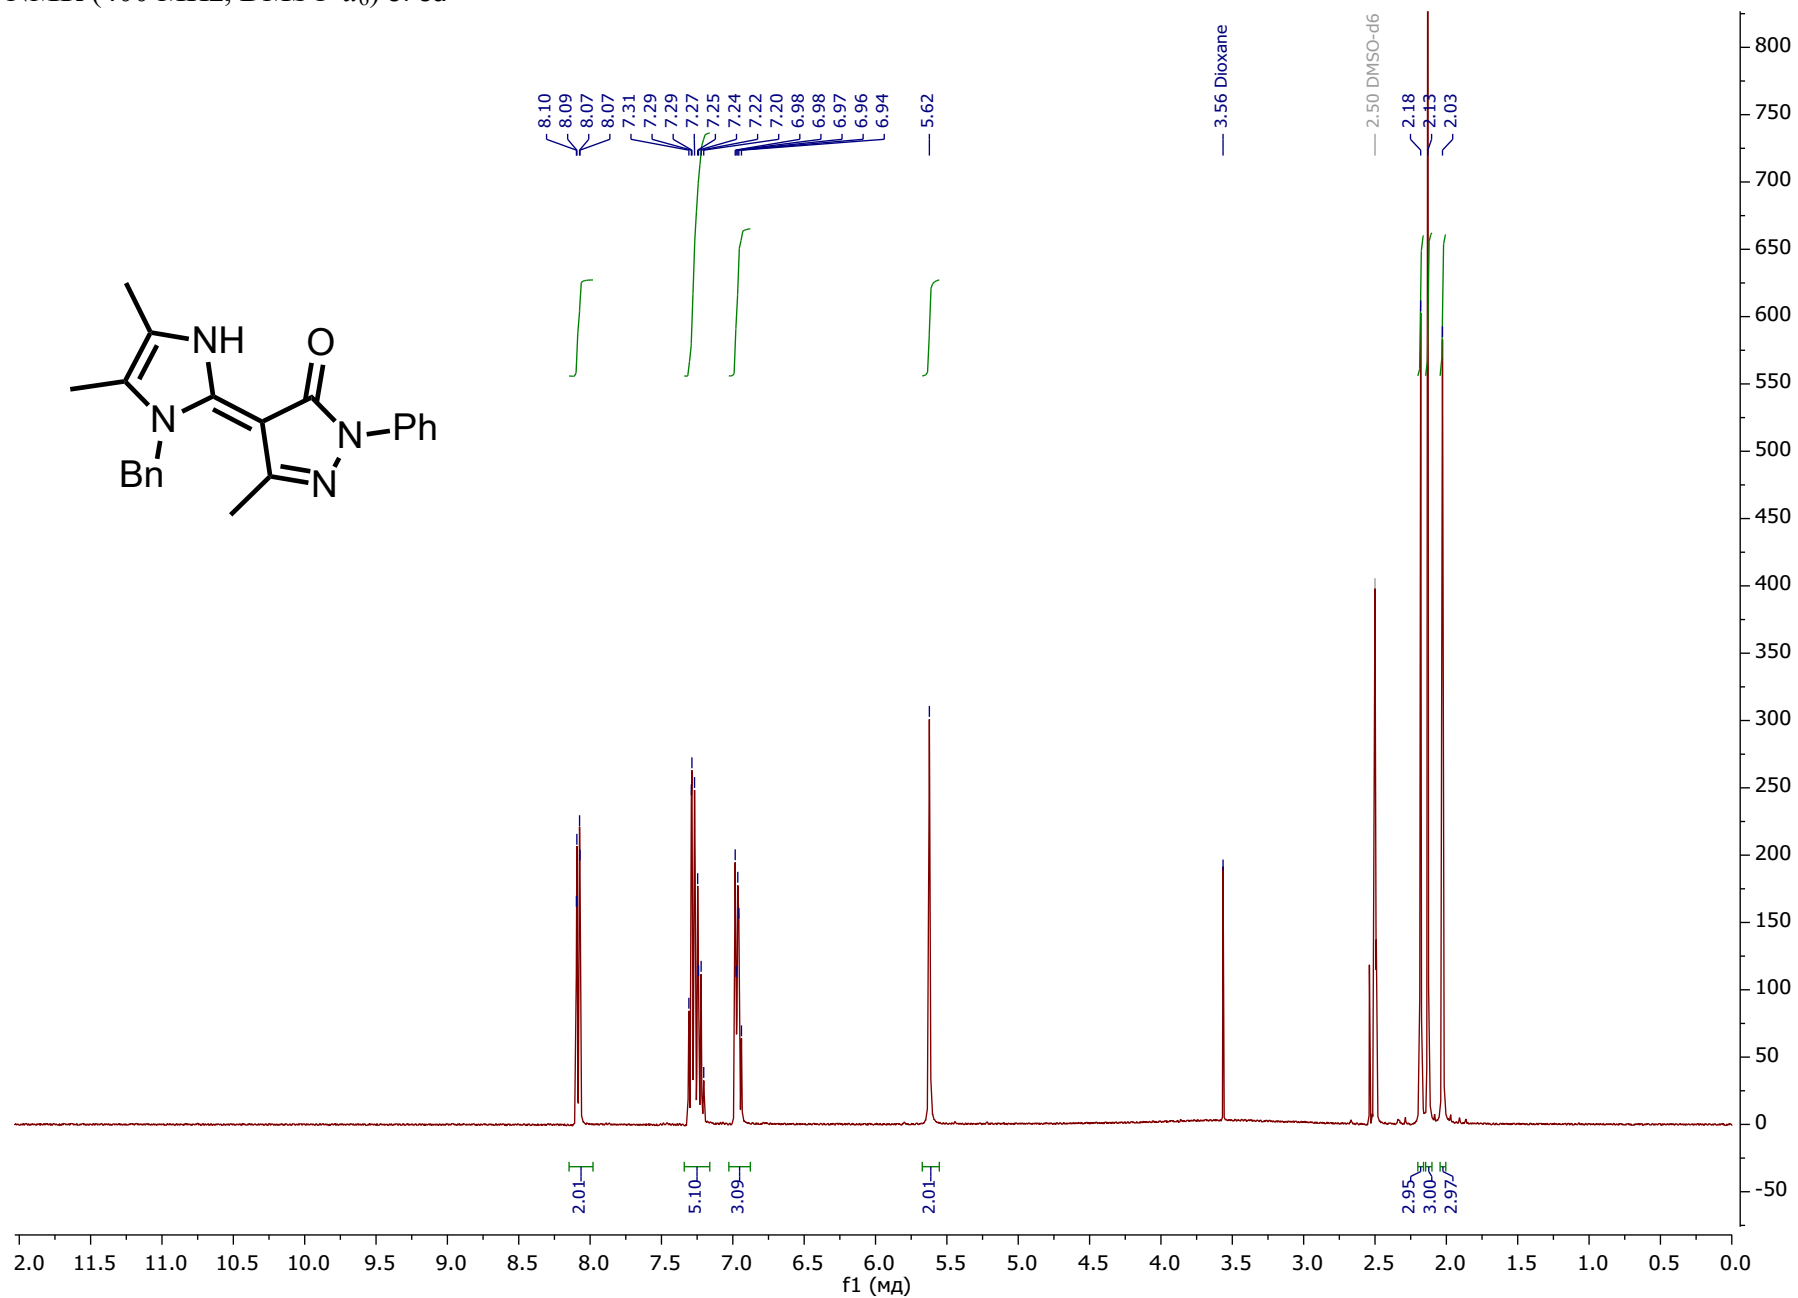

$^{13}\text{C}\{^1\text{H}\}$  NMR (151 MHz, DMSO- $d_6$ ) of **6a**

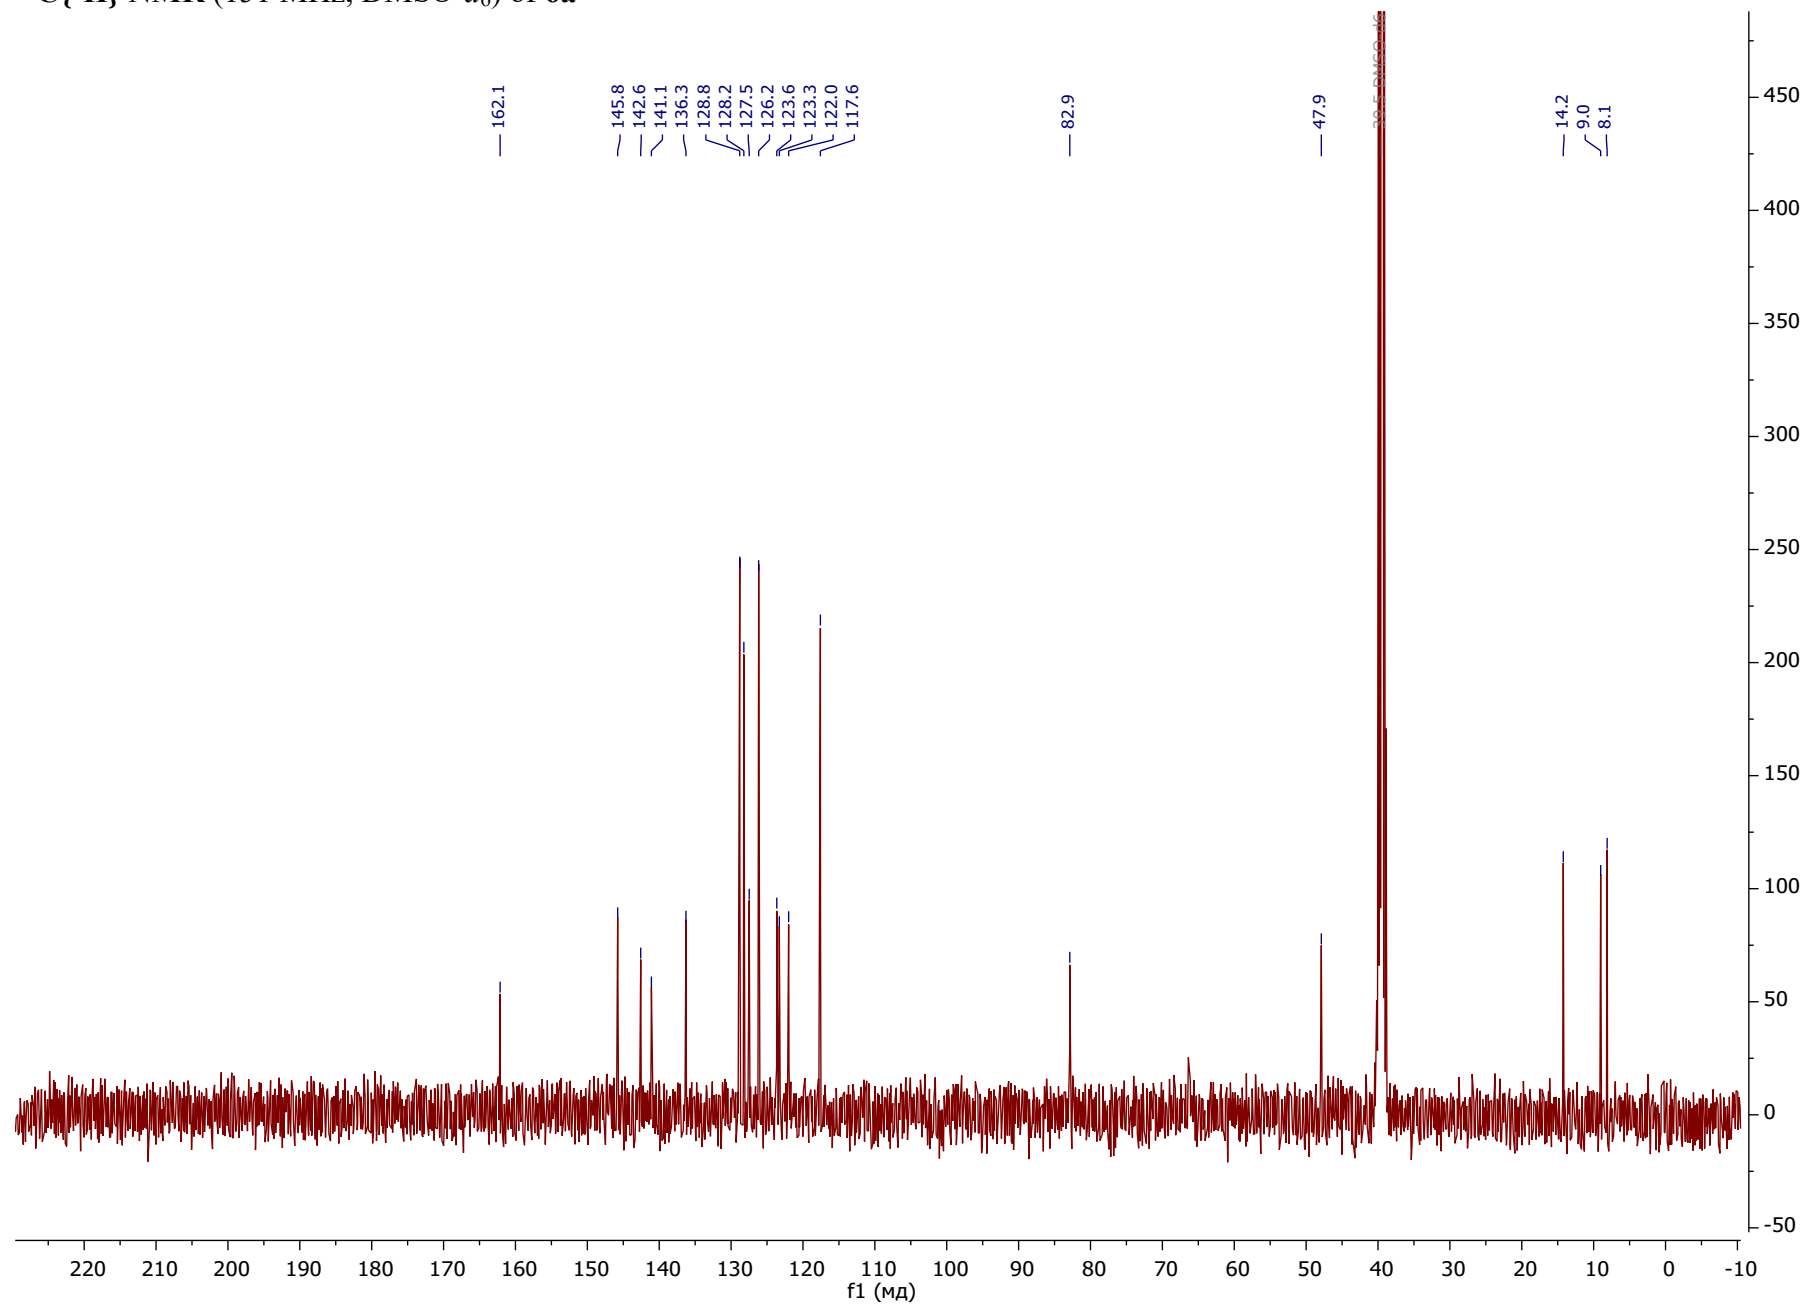

<sup>1</sup>H NMR (400 MHz, DMSO-d<sub>6</sub>) of **6b**

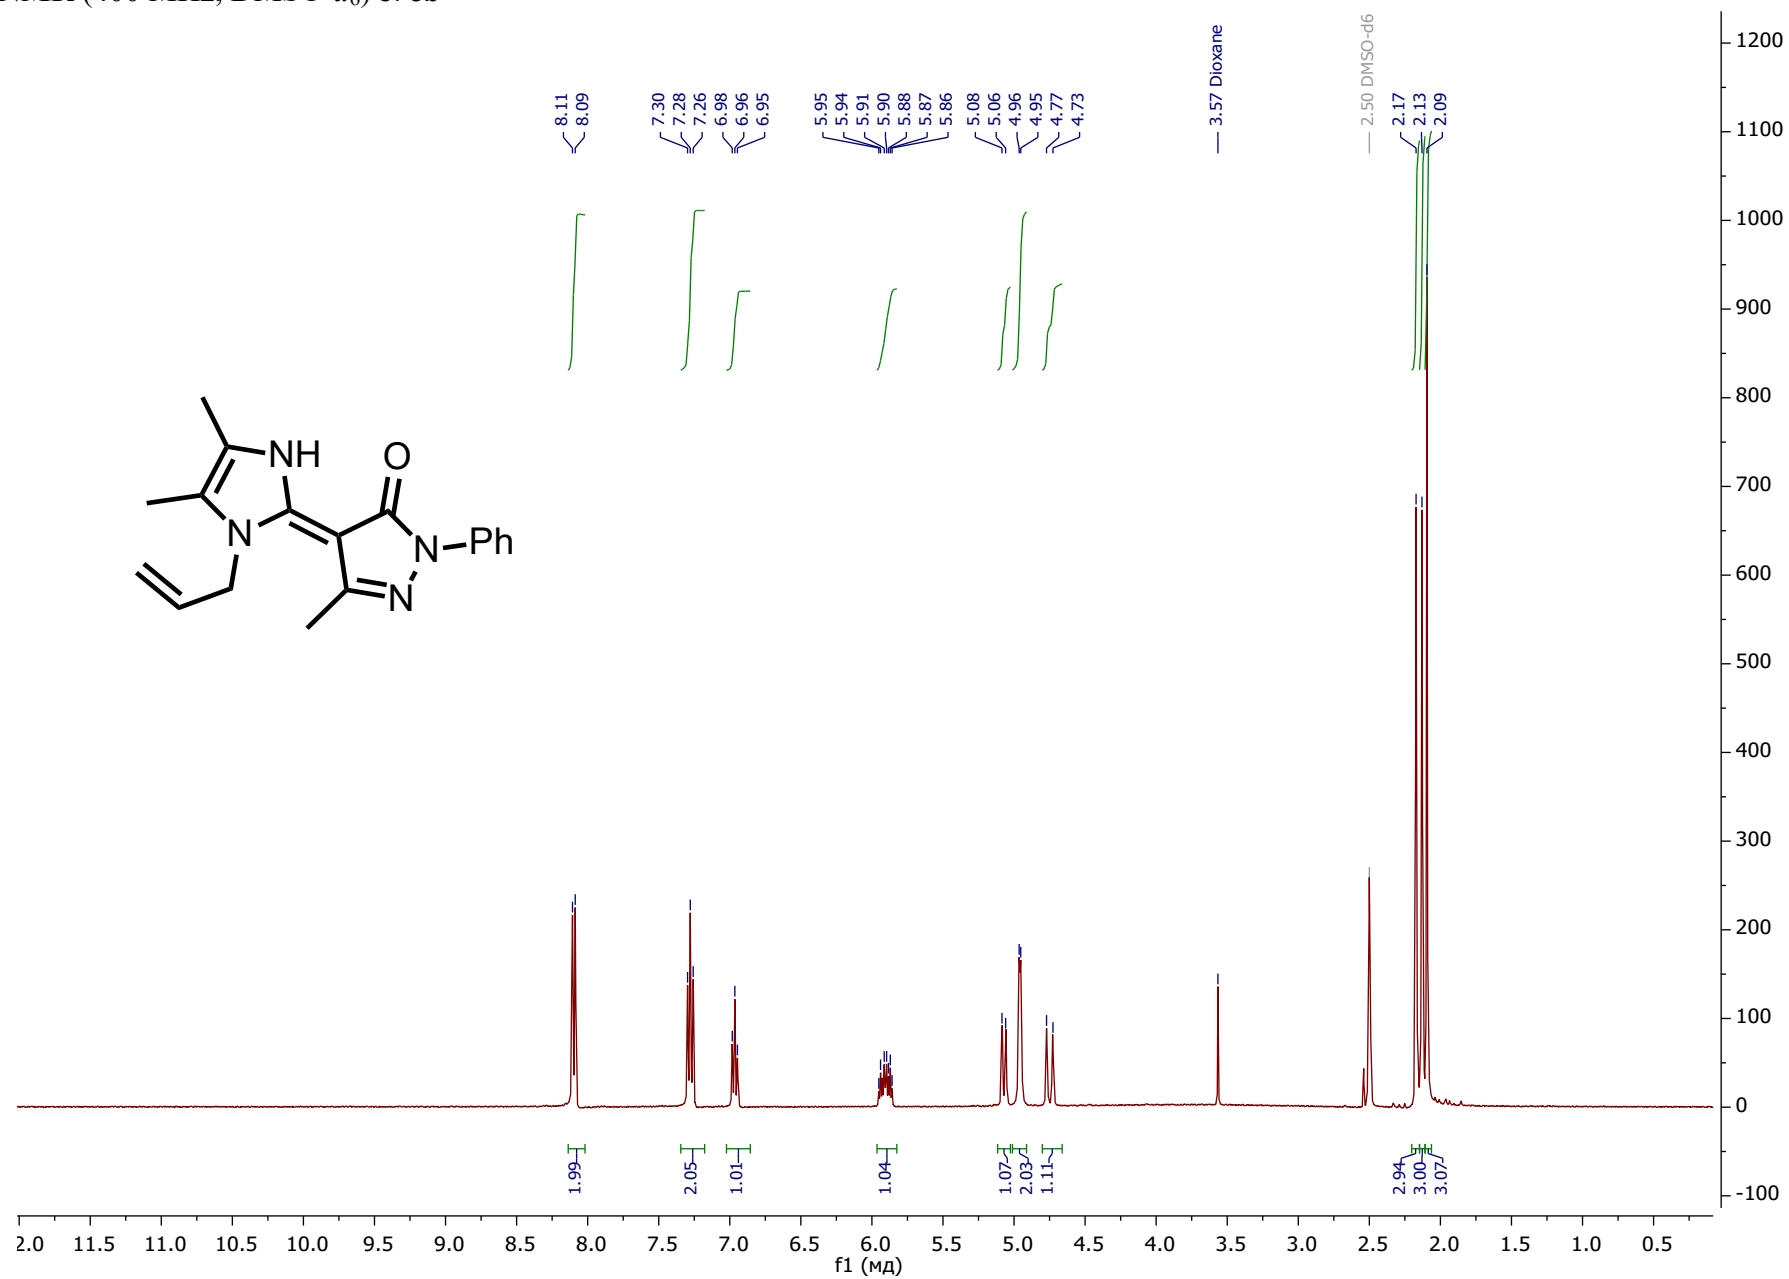

$^{13}\text{C}\{^1\text{H}\}$  NMR (151 MHz,  $\text{DMSO-}d_6$ ) of **6b**

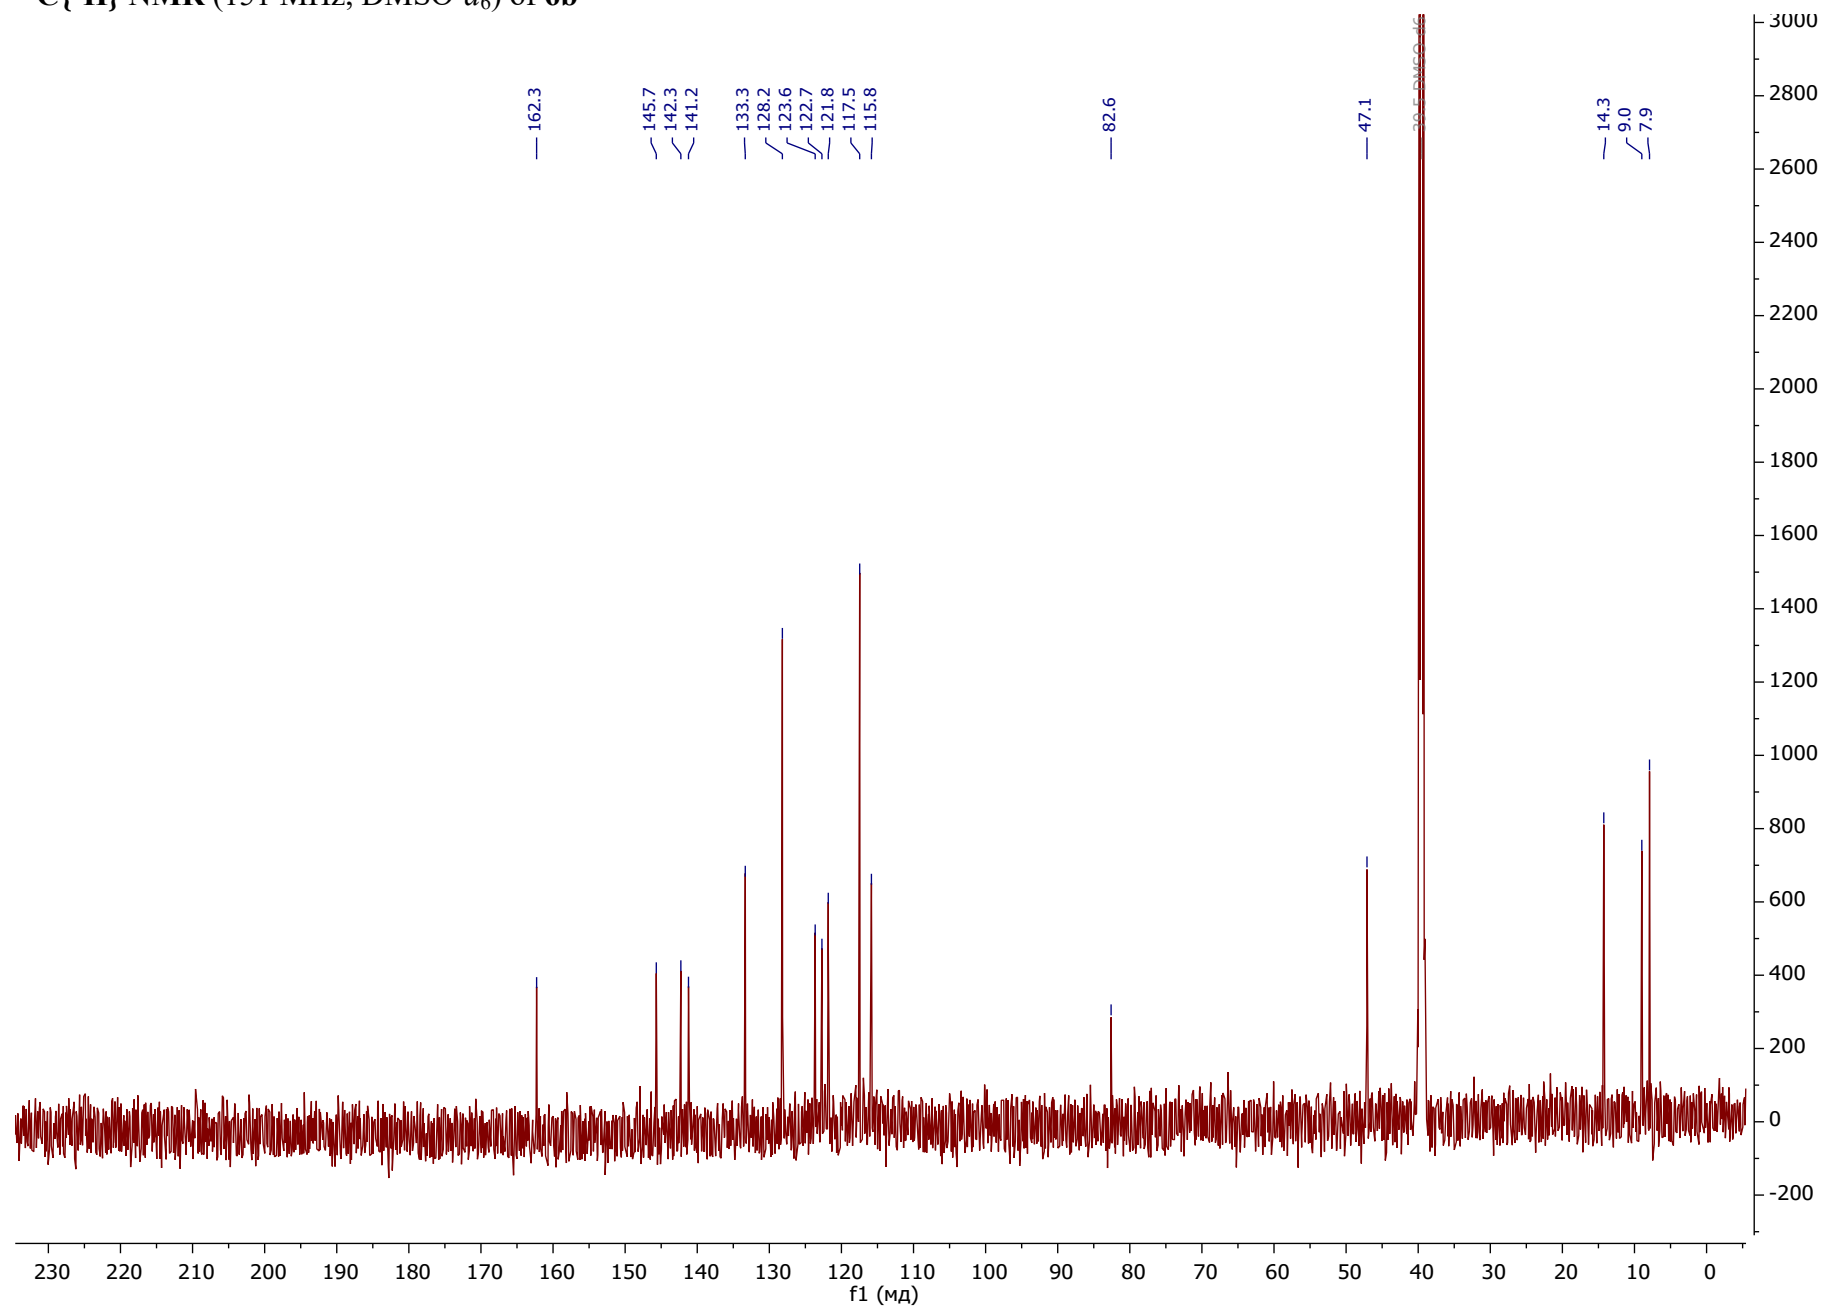

**X-ray crystallography.** X-ray diffraction data for **5**, **3c**, **3h** and **3j** were collected at 100 K with a Bruker Quest D8 CMOS diffractometer, using graphite monochromated Mo-K $\alpha$  radiation ( $\lambda = 0.71073$  Å). Using Olex2,<sup>1</sup> the structures were solved with the ShelXT<sup>2</sup> structure solution program using Intrinsic Phasing and refined with the XL<sup>3</sup> refinement package using Least-Squares minimization against F<sup>2</sup> in anisotropic approximation for non-hydrogen atoms. Hydrogen atoms of NH group in **5** and those of OH groups in **3c**, **3h** and **3j** were located from difference Fourier synthesis while the positions of other hydrogen atoms were calculated, and they all were refined in isotropic approximation within the riding model. Crystal data and structure refinement parameters are given in Table 1. CCDC 2210062, 2210061, 2210576 and 2210575 contain the supplementary crystallographic data for **5**, **3c**, **3h** and **3j**, respectively.

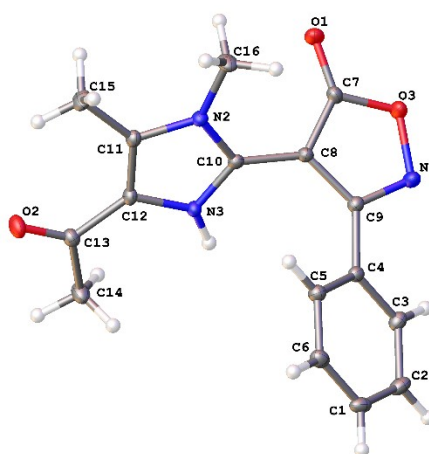

**Fig. 1.** General view of **5** in representation of atoms *via* thermal ellipsoids at 50% probability level.

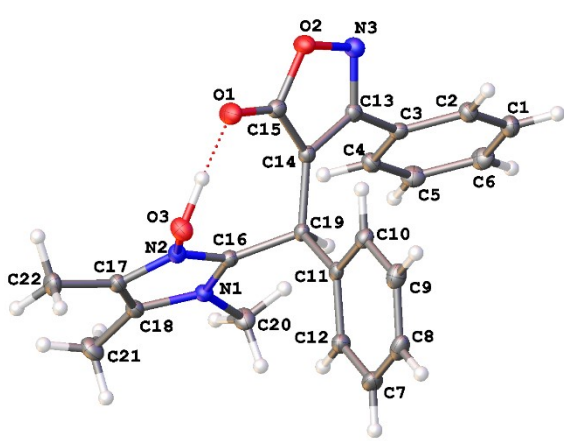

**Fig. 2.** General view of **3c** in representation of atoms *via* thermal ellipsoids at 50% probability level.

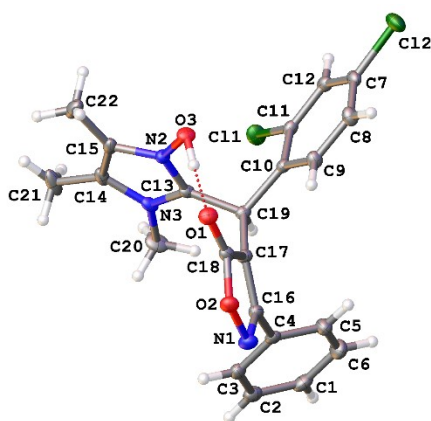

**Fig. 3.** General view of **3h** in representation of atoms *via* thermal ellipsoids at 50% probability level.

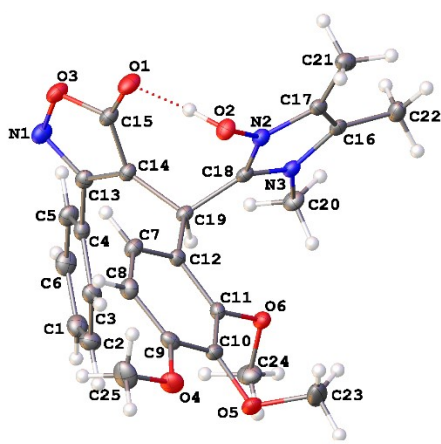

**Fig. 4.** General view of **3j** in representation of atoms *via* thermal ellipsoids at 50% probability level.

**Table 1.** Crystal data and structure refinement parameters for **5**, **3c**, **3h** and **3j**.

|                   | <b>5</b>                                                      | <b>3c</b>                                                     | <b>3h</b>                                                                     | <b>3j</b>                                                     |
|-------------------|---------------------------------------------------------------|---------------------------------------------------------------|-------------------------------------------------------------------------------|---------------------------------------------------------------|
| Empirical formula | C <sub>16</sub> H <sub>15</sub> N <sub>3</sub> O <sub>3</sub> | C <sub>22</sub> H <sub>21</sub> N <sub>3</sub> O <sub>3</sub> | C <sub>22</sub> H <sub>19</sub> Cl <sub>2</sub> N <sub>3</sub> O <sub>3</sub> | C <sub>25</sub> H <sub>27</sub> N <sub>3</sub> O <sub>6</sub> |
| Formula weight    | 297.316                                                       | 375.430                                                       | 444.320                                                                       | 465.510                                                       |
| T, K              | 100                                                           | 100                                                           | 100                                                                           | 100                                                           |
| Crystal system    | Orthorhombic                                                  | Monoclinic                                                    | Monoclinic                                                                    | Triclinic                                                     |
| Space group       | Pna2 <sub>1</sub>                                             | P2 <sub>1</sub> /n                                            | P2 <sub>1</sub> /c                                                            | P-1                                                           |
| Z                 | 4                                                             | 4                                                             | 4                                                                             | 2                                                             |
| a, Å              | 8.0260(2)                                                     | 8.1378(1)                                                     | 7.7044(1)                                                                     | 8.3902(2)                                                     |
| b, Å              | 18.0409(4)                                                    | 24.1686(4)                                                    | 12.9589(2)                                                                    | 11.0278(2)                                                    |
| c, Å              | 10.1247(2)                                                    | 10.0882(2)                                                    | 20.3448(3)                                                                    | 14.1048(3)                                                    |
| α, °              | 90                                                            | 90                                                            | 90                                                                            | 70.487(1)                                                     |
| β, °              | 90                                                            | 111.523(1)                                                    | 92.514(1)                                                                     | 84.727(1)                                                     |



|                                                            |              |              |              |              |
|------------------------------------------------------------|--------------|--------------|--------------|--------------|
| $\alpha$ , °                                               | 90           | 90           | 90           | 72.340(1)    |
| V, Å <sup>3</sup>                                          | 1466.02(6)   | 1845.79(5)   | 2029.28(5)   | 1172.06(4)   |
| D <sub>calc</sub> (g cm <sup>-3</sup> )                    | 1.347        | 1.351        | 1.454        | 1.319        |
| $\beta$ , cm <sup>-1</sup>                                 | 0.95         | 0.92         | 3.5          | 0.95         |
| F(000)                                                     | 624          | 792          | 920          | 492          |
| 2 $\theta$ <sub>max</sub> , °                              | 58           | 58           | 58           | 58           |
| Reflections measured                                       | 27619        | 24713        | 26626        | 15851        |
| Independent reflections                                    | 3887         | 4899         | 5389         | 6209         |
| Observed reflections [I > 2 $\sigma$ (I)]                  | 3337         | 4028         | 4673         | 4844         |
| Parameters                                                 | 203          | 256          | 274          | 313          |
| R1                                                         | 0.0304       | 0.0421       | 0.0335       | 0.0450       |
| wR2                                                        | 0.0729       | 0.1092       | 0.0865       | 0.1111       |
| GOF                                                        | 1.022        | 1.024        | 1.027        | 1.019        |
| $\Delta\rho_{\max}/\Delta\rho_{\min}$ (e Å <sup>-3</sup> ) | 0.225/-0.230 | 0.396/-0.357 | 0.370/-0.302 | 0.302/-0.291 |

## References

- 1 O. V. Dolomanov, L. J. Bourhis, R. J. Gildea, J. A. K. Howard and H. Puschmann, *J. Appl. Crystallogr.*, 2009, **42**, 339–341.
- 2 G. M. Sheldrick, *Acta Crystallogr. Sect. A Found. Adv.*, 2015, **71**, 3–8.
- 3 G. M. Sheldrick, *Acta Crystallogr. Sect. A Found. Crystallogr.*, 2008, **64**, 112–122.
